# Supplementary material for: Host effects on the optically active 4f and 5d levels of Ce3+ in garnets
Source: Royal Society of Chemistry journal article supplement (doi:10.1039/c3cp53465k), 2013-01-01
Supplement: c3cp53465k.ecp [file c3cp53465k.ecp]

********************************************************************************
*         E.7. Garnets
********************************************************************************
*
*         E.7.X. Y3Al5O12 (YAG)
*         E.7.X. Gd3Al5O12 (GdAG)
*         E.7.X. Er3Al5O12 (ErAG)
*         E.7.X. Yb3Al5O12 (YbAG)
*         E.7.X. Lu3Al5O12 (LuAG)
*         E.7.X. Y3Ga5O12 (YGG)
*         E.7.X. Nd3Ga5O12 (NdGG)
*         E.7.X. Sm3Ga5O12 (SmGG)
*         E.7.X. Gd3Ga5O12 (GdGG)
*         E.7.X. Tb3Ga5O12 (TbGG)
*         E.7.X. Dy3Ga5O12 (DyGG)
*         E.7.X. Ho3Ga5O12 (HoGG)
*         E.7.X. Yb3Ga5O12 (YbGG)
*         E.7.X. Lu3Ga5O12 (LuGG)
*         E.7.X. Mg3Al2Si3O12 (Pyrope)
*         E.7.X. Ca3Al2Si3O12 (Grossular)
*         E.7.X. Mn3Al2Si3O12 (Spessartine)
*         E.7.X. Fe3Al2Si3O12 (Almandine)
*         E.7.X. Ca3Fe2Si3O12 (Andradite)
*         E.7.X. Ca3Sc2Si3O12 
*         E.7.X. Lu2CaMg2Si3O12 
*
********************************************************************************
*         E.7.X. Y3Al5O12 (YAG)
********************************************************************************
*           E.7.X.a. Y3Al5O12
*             Structure:
*                    F.Euler, J.A.Bruce, Acta Cryst. (1965) 19, 971
*                    (Ia-3d; a=12.000A, x=-0.0306, =0.0512, z=0.1500)
*             Embedding potentials:
*                    L.Seijo, Z.Barandiaran, to be published
*                    Out of SCEI DKH-HF calculations
*             /Y.ECP.Seijo.0s.0s.0e-AIMP-Y3Al5O12-Y.
*             /Al.ECP.Seijo.0s.0s.0e-AIMP-Y3Al5O12-Al(oct).
*             /Al.ECP.Seijo.0s.0s.0e-AIMP-Y3Al5O12-Al(tet).
*             /Al.ECP.Seijo.11s8p.1s1p.0e-AIMP-Y3Al5O12-Al(tet).
*             /O.ECP.Seijo.0s.0s.0e-AIMP-Y3Al5O12-O.
********************************************************************************
/Y.ECP.Seijo.0s.0s.0e-AIMP-Y3Al5O12-Y.          
Embedding AIMP of Y(3+) in Y3Al5O12 
made feb 2012
   3.000    0
    0    0
*
* External AIMP: 
* Local Pot. Param. : (ECP convention)
*                      A(AIMP)=-Zeff*A(ECP)
*
M1
   13
  388070.0000      64784.00000      16202.00000      4773.900000    
  1549.300000      543.0700000      201.2600000      87.22300000    
  30.64200000      11.17220000      4.954500000      1.488000000    
 0.7859700000    
 0.9959940948E-01 0.1121543269     0.1999511662     0.3465216865    
 0.5476304414     0.6161757923     0.9253843245      1.619946117    
  1.064944586      3.283461932     0.9918829773      1.365455742    
 0.8268914979    
M2
    0
COREREP
   1.000
PROJOP
    2
   16    4    2    2    2    2
  1231.827580      171.1832608      29.13033963      3.889624562    
  22535.50000      3394.400000      769.3080000      207.1720000    
  309.4710000      35.23740000      14.99810000      27.48500000    
  4.753340000      2.129620000      3.441250000     0.6778690000    
 0.2881100000     0.3732010000     0.5311200000E-01 0.2174400000E-01
 -0.016450622887 -0.005235405027 -0.002155981358  0.000800126785
 -0.118754808361 -0.039875308437 -0.016570121970  0.006161688751
 -0.410184464382 -0.157737517544 -0.066445796124  0.024737908581
 -0.442089434944 -0.220095179495 -0.095784908373  0.035699120857
 -0.097580663135 -0.087727113500 -0.042130928171  0.016187688212
 -0.368549779523  0.723463911438  0.422381837373 -0.162720817715
 -0.126108056419  0.469858283827  0.306611292993 -0.118860243430
  0.403539638843 -0.069686811784  0.135707480518 -0.075746288269
  0.133364027124 -0.037099973650 -1.040633340034  0.507299977703
  0.059063998127 -0.035141787440 -0.509474032238  0.276156525417
 -0.155239581199  0.076408247735  0.241460620039  0.173353381989
 -0.020926323447  0.014466783720  0.046667274092 -0.945437549153
 -0.017294011276  0.012545858564  0.052704527723 -0.463038766779
  0.029217692869 -0.021004475407 -0.086680770412  0.077653151829
  0.000777434263 -0.000588800329 -0.002258643987  0.038391934537
 -0.000304429245  0.000232310992  0.000885625410 -0.011365490253
   10    3    6    6    6
  155.9319927      23.33275830      2.129580085    
  987.0300000      232.0540000      72.33480000      24.87860000    
  11.45280000      4.717860000      2.027620000      1.093910000    
 0.4690800000     0.1901090000    
 -0.025905077634 -0.011034372127 -0.003810947431
 -0.170588913248 -0.076457980032 -0.026592739490
 -0.493620235398 -0.238468539120 -0.084090221216
 -0.453731204167 -0.209712752335 -0.072326967602
 -0.012460241278  0.359498961982  0.159285483934
 -0.045428609466  0.610054558164  0.310826849293
  0.034709974805  0.221016748863  0.064766765833
 -0.023304909805 -0.005407608751 -0.431146533375
  0.008455322564  0.007247073064 -0.649199342983
 -0.002292867421 -0.001794709379 -0.082711554965
    7    1   10
  12.79405387    
  93.48480000      26.40650000      8.826900000      2.931690000    
  1.301810000     0.3877800000     0.1036240000    
 -0.049043414602
 -0.253215963461
 -0.532085551226
 -0.391809167574
 -0.027057874459
 -0.016042212058
  0.004261478279
*
Spectral Representation Operator
Core primitive basis
Exchange
End of Spectral Representation Operator
 

/Al.ECP.Seijo.0s.0s.0e-AIMP-Y3Al5O12-Al(oct).       
Embedding AIMP of Alo(3+) in Y3Al5O12 
made feb 2012
   3.000    0
    0    0
*
* External AIMP: 
* Local Pot. Param. : (ECP convention)
*                      A(AIMP)=-Zeff*A(ECP)
*
M1
   12
  372971.1700      57385.37550      13169.30800      3619.437590    
  1148.006930      394.6778150      149.5069970      60.26483830    
  23.41066380      9.773332000      4.340800000      1.918320000    
 0.2198396561E-01 0.2664649099E-01 0.4917698520E-01 0.8352965447E-01
 0.1414147658     0.2358767843     0.3162764399     0.3088107353    
 0.3504151209     0.7585280647     0.8198342843     0.2208400419    
M2
    0
COREREP
   1.000
PROJOP
    1
   11    2    2    2
  116.9777773      9.729080356    
  5908.580000      885.1210000      200.7280000      56.13320000    
  17.16260000      29.59110000      2.997320000      1.069540000    
  1.307260000     0.1651860000     0.6055000000E-01
  0.005666371130  0.001486506195
  0.042199413679  0.011030434845
  0.190348383886  0.054794888632
  0.462112388398  0.144544700036
  0.382433145576  0.138661219352
  0.043210995863  0.073514006068
  0.051211616822 -0.603790575593
  0.066183999736 -0.528489198799
 -0.088877922282  0.018397912372
 -0.002568568829 -0.014521656893
  0.000991842024  0.010892406627
    8    1    6
  6.372830994    
  122.4420000      28.65160000      8.855250000      2.980410000    
  1.001540000     0.3105050000     0.1124240000     0.4102600000E-01
 -0.013939929844
 -0.091713664713
 -0.297452924072
 -0.500118535077
 -0.311270080010
 -0.012287074848
  0.005097063584
 -0.000383339073
*
Spectral Representation Operator
Core primitive basis
Exchange
End of Spectral Representation Operator
 

/Al.ECP.Seijo.0s.0s.0e-AIMP-Y3Al5O12-Al(tet).       
Embedding AIMP of Alt(3+) in Y3Al5O12 
made feb 2012
   3.000    0
    0    0
*
* External AIMP: 
* Local Pot. Param. : (ECP convention)
*                      A(AIMP)=-Zeff*A(ECP)
*
M1
   12
  373644.1700      57242.17550      13135.20800      3611.607590    
  1144.386930      393.3688150      148.8839970      59.87703830    
  23.20256380      9.711662000      4.325120000      1.924140000    
 0.2198296782E-01 0.2672891451E-01 0.4917923955E-01 0.8370143819E-01
 0.1416763226     0.2364146098     0.3169277351     0.3096668351    
 0.3520352589     0.7606783183     0.8128554494     0.2214862442    
M2
    0
COREREP
   1.000
PROJOP
    1
   11    2    2    2
  116.8205293      9.570924581    
  5908.580000      885.1210000      200.7280000      56.13320000    
  17.16260000      29.59110000      2.997320000      1.069540000    
  1.307260000     0.1651860000     0.6055000000E-01
  0.005666385934  0.001486557396
  0.042199468120  0.011032212602
  0.190349103417  0.054792001426
  0.462111100117  0.144634427710
  0.382422811403  0.138962456441
  0.043220891941  0.073271048494
  0.051226912519 -0.605364614906
  0.066346311525 -0.543715434703
 -0.089034861478  0.033035653916
 -0.002614040360 -0.010448459137
  0.001001867473  0.009974486812
    8    1    6
  6.216092921    
  122.4420000      28.65160000      8.855250000      2.980410000    
  1.001540000     0.3105050000     0.1124240000     0.4102600000E-01
 -0.013937393067
 -0.091680869771
 -0.297420306543
 -0.499760667660
 -0.311755255302
 -0.012875247985
  0.006574702980
 -0.000488126629
*
Spectral Representation Operator
Core primitive basis
Exchange
End of Spectral Representation Operator
 

/Al.ECP.Seijo.11s8p.1s1p.0e-AIMP-Y3Al5O12-Al(tet).       
Embedding AIMP of Alt(3+) in Y3Al5O12 with orthogonality orbitals
made feb 2012
   3.000    1
   11    1
  5908.580000      885.1210000      200.7280000      56.13320000    
  17.16260000      29.59110000      2.997320000      1.069540000    
  1.307260000     0.1651860000     0.6055000000E-01
   0.001486557396
   0.011032212602
   0.054792001426
   0.144634427710
   0.138962456441
   0.073271048494
  -0.605364614906
  -0.543715434703
   0.033035653916
  -0.010448459137
   0.009974486812
    8    1 
  122.4420000      28.65160000      8.855250000      2.980410000    
  1.001540000     0.3105050000     0.1124240000     0.4102600000E-01
 -0.013937393067
 -0.091680869771
 -0.297420306543
 -0.499760667660
 -0.311755255302
 -0.012875247985
  0.006574702980
 -0.000488126629
*
* External AIMP: 
* Local Pot. Param. : (ECP convention)
*                      A(AIMP)=-Zeff*A(ECP)
*
M1
   12
  373644.1700      57242.17550      13135.20800      3611.607590    
  1144.386930      393.3688150      148.8839970      59.87703830    
  23.20256380      9.711662000      4.325120000      1.924140000    
 0.2198296782E-01 0.2672891451E-01 0.4917923955E-01 0.8370143819E-01
 0.1416763226     0.2364146098     0.3169277351     0.3096668351    
 0.3520352589     0.7606783183     0.8128554494     0.2214862442    
M2
    0
COREREP
   1.000
PROJOP
    1
   11    2    2    2
  116.8205293      9.570924581    
  5908.580000      885.1210000      200.7280000      56.13320000    
  17.16260000      29.59110000      2.997320000      1.069540000    
  1.307260000     0.1651860000     0.6055000000E-01
  0.005666385934  0.001486557396
  0.042199468120  0.011032212602
  0.190349103417  0.054792001426
  0.462111100117  0.144634427710
  0.382422811403  0.138962456441
  0.043220891941  0.073271048494
  0.051226912519 -0.605364614906
  0.066346311525 -0.543715434703
 -0.089034861478  0.033035653916
 -0.002614040360 -0.010448459137
  0.001001867473  0.009974486812
    8    1    6
  6.216092921    
  122.4420000      28.65160000      8.855250000      2.980410000    
  1.001540000     0.3105050000     0.1124240000     0.4102600000E-01
 -0.013937393067
 -0.091680869771
 -0.297420306543
 -0.499760667660
 -0.311755255302
 -0.012875247985
  0.006574702980
 -0.000488126629
*
Spectral Representation Operator
Core primitive basis
Exchange
End of Spectral Representation Operator
 

/O.ECP.Seijo.0s.0s.0e-AIMP-Y3Al5O12-O.          
Embedding AIMP of O(2-) in Y3Al5O12 
made feb 2012
  -2.000    0
    0    0
*
* External AIMP: 
* Local Pot. Param. : (ECP convention)
*                      A(AIMP)=-Zeff*A(ECP)
*
M1
   12
  282885.8300      34740.01200      6502.573000      1486.426000    
  406.8273300      124.8370000      41.98461900      13.81633000    
  4.272136000      1.610321600     0.6078900000     0.2644720000    
 -.2176772692E-01 -.3180710258E-01 -.6531869532E-01 -.1218572016    
 -.2184493311     -.3840434358     -.5101913931     -.4591120433    
 -.7587440903     -1.302195929     -1.057599586     -.6891346470E-01
M2
    0
COREREP
   1.000
PROJOP
    1
    8    2    2    2
  40.32809097      1.975006447    
  2048.050000      309.0990000      70.41410000      19.70120000    
  6.031450000      10.22970000     0.9340900000     0.2862500000    
  0.006201985816  0.001319762401
  0.045638881291  0.009615426388
  0.200053532534  0.046774419137
  0.473801182972  0.115165895617
  0.380745526304  0.099736526978
  0.028981677982  0.068302011390
  0.024655611632 -0.466605612731
 -0.005630659656 -0.638378785651
    6    1    6
 0.5178933102    
  34.97120000      7.845090000      2.303320000     0.7219800000    
 0.2155300000     0.5900000000E-01
 -0.013149860072
 -0.085196709628
 -0.249038097469
 -0.435837377500
 -0.511844812659
  0.093253886725
*
Spectral Representation Operator
Core primitive basis
Exchange
End of Spectral Representation Operator
 
********************************************************************************
*         E.7.X. Gd3Al5O12 (GdAG)
********************************************************************************
*           E.7.X.a. Gd3Al5O12
*             Structure:
*                    F.Euler, J.A.Bruce, Acta Cryst. (1965) 19, 971
*                    (Ia-3d; a=12.113A, x=-0.0311, =0.0509, z=0.1490)
*             Embedding potentials:
*                    L.Seijo, Z.Barandiaran, to be published
*                    Out of SCEI DKH-HF calculations
*             /Gd.ECP.Seijo.0s.0s.0e-AIMP-Gd3Al5O12-Gd.
*             /Al.ECP.Seijo.0s.0s.0e-AIMP-Gd3Al5O12-Al(oct).
*             /Al.ECP.Seijo.0s.0s.0e-AIMP-Gd3Al5O12-Al(tet).
*             /Al.ECP.Seijo.11s8p.1s1p.0e-AIMP-Gd3Al5O12-Al(tet).
*             /O.ECP.Seijo.0s.0s.0e-AIMP-Gd3Al5O12-O.
********************************************************************************
/Gd.ECP.Seijo.0s.0s.0e-AIMP-Gd3Al5O12-Gd.       
Embedding AIMP of Gd(3+) in Gd3Al5O12 
made Sat.Feb.18.04:37:30.CET.2012
   3.000    0
    0    0
*
* External AIMP: 
* Local Pot. Param. : (ECP convention)
*                      A(AIMP)=-Zeff*A(ECP)
*
M1
   15
  523280.0000      106622.0000      31433.00000      10437.90000    
  3770.900000      1399.020000      535.5900000      242.6800000    
  84.03300000      42.60000000      8.721600000      5.341600000    
  2.229680000      1.091980000     0.5877100000    
 0.1803616534     0.1695674148     0.2813291676     0.4419395416    
 0.6124732674     0.7658005319      1.342356925      1.685646186    
  1.480384505      3.979748741      3.356753456      2.530144846    
  1.289745122      1.776850132     0.4402318437    
M2
    0
COREREP
   1.000
PROJOP
    3
   27    5    2    2    2    2    2
  3706.509237      621.1618627      141.5091250      30.15862386    
  4.149367482    
 0.3700172100E+11  4423337400.      736627460.0      157466940.0    
  39988049.00      11295642.00      3442911.200      1134401.600    
  396957.8400      146564.4700      56594.52400      22562.05300    
  9206.733200      3830.103100      1630.518600      716.1974000    
  325.1370300      141.1383600      65.40259600      26.42438900    
  13.67116900      5.375686200      2.679150400     0.7681474100    
 0.3539498300     0.6287505600E-01 0.2555431900E-01
 -0.000000917332 -0.000000349079 -0.000000146245  0.000000080682 -0.000000028044
  0.000003986801  0.000001516565  0.000000635878 -0.000000350434  0.000000121948
 -0.000014205728 -0.000005391780 -0.000002271839  0.000001243952 -0.000000435682
  0.000054650712  0.000020522913  0.000008850704 -0.000004699173  0.000001694905
  0.000441243445  0.000158241549  0.000075196169 -0.000035000285  0.000014263445
  0.000565846113  0.000209735118  0.000093340545 -0.000047531092  0.000017858509
  0.001522767147  0.000544739735  0.000261762891 -0.000120008515  0.000049422096
  0.002956203883  0.001096648910  0.000492140422 -0.000248215581  0.000094834841
  0.006031192580  0.002179540528  0.001043016756 -0.000481210592  0.000193815074
  0.011940541599  0.004446368088  0.002038865431 -0.001004874943  0.000407357463
  0.023817954676  0.008874913470  0.004168001905 -0.001990301249  0.000797298007
  0.048161102026  0.018485456186  0.008621256954 -0.004174941578  0.001682996373
  0.098177110031  0.038894250051  0.018373444361 -0.008856296924  0.003562950129
  0.191812863794  0.082367511868  0.039115853062 -0.018986194300  0.007653729141
  0.315420293649  0.154019808611  0.075529538022 -0.036697718449  0.014797469753
  0.335137793082  0.212121626840  0.107188958949 -0.053005422288  0.021454196854
  0.150182418755  0.041586014109  0.019831225301 -0.008751994956  0.003468580986
  0.011788706404 -0.489049769067 -0.398055510955  0.215917218165 -0.089301370208
 -0.000097179987 -0.569452043387 -0.612596712327  0.372304405742 -0.158164425321
 -0.000175566363 -0.104812637293  0.413913904023 -0.385204964353  0.179879324721
  0.000095791459  0.017283488901  0.847326566305 -1.020280252404  0.510706747280
 -0.000055236424 -0.006053004682  0.124799503369  0.559602870815 -0.413009388359
  0.000034470271  0.002946985411 -0.017322298994  0.893093342917 -0.838333262119
 -0.000011942629 -0.000945655554  0.004583326215  0.060660050600  0.749680058254
  0.000005480747  0.000456510702 -0.002193332290 -0.013808107253  0.637894421872
 -0.000001432741 -0.000114993910  0.000516296570  0.002359993324 -0.017182494232
  0.000000716130  0.000053174047 -0.000236544306 -0.001072853329  0.001731356661
   23    4    6    6    6    6
  553.6296824      120.0167897      22.83113287      2.108110882    
  52152768.00      7440218.200      1535484.400      390559.5700    
  115469.6900      38541.38300      14246.67200      5740.201200    
  2485.279400      1142.789900      552.6307600      278.5198000    
  145.3092600      77.64298100      41.88607700      22.88097100    
  12.55486200      6.669495900      3.480984200      1.766148600    
 0.8173020900     0.3708105400     0.1513552600    
  0.000000450550 -0.000000179853 -0.000000161179  0.000000032387
 -0.000019254382  0.000009293132  0.000004733802  0.000001262271
 -0.000049081981  0.000024789763  0.000010631040  0.000005053838
 -0.000141218580  0.000068271722  0.000034792721  0.000008978437
 -0.000383475875  0.000190630836  0.000088611977  0.000035932417
 -0.001055753660  0.000522725188  0.000249457606  0.000090087274
 -0.002945442740  0.001466983196  0.000696360279  0.000260322484
 -0.008318426427  0.004171221661  0.001985687961  0.000732400508
 -0.023197090052  0.011767048508  0.005616477507  0.002093227900
 -0.061008057070  0.031616148947  0.015153804994  0.005598765877
 -0.140829645177  0.075536198830  0.036521066167  0.013664284592
 -0.260083869311  0.146567303048  0.071619769120  0.026483898596
 -0.339961818363  0.199295358752  0.098645976451  0.037411171768
 -0.259693238380  0.099353790403  0.039712682452  0.012823570633
 -0.088837114314 -0.226375285585 -0.162562977459 -0.062523741049
 -0.008217531458 -0.508767522448 -0.398157871214 -0.169390680402
 -0.000643771558 -0.339817212692 -0.198715002881 -0.060940320854
  0.000336548402 -0.068756233603  0.420038476428  0.214518256320
 -0.000061072151 -0.002350922134  0.603824258238  0.400946572378
  0.000063619025 -0.000753899575  0.207353015899 -0.014837515303
 -0.000024282625  0.000202056642  0.012085276756 -0.532476444918
  0.000009090421 -0.000079096204  0.001326638786 -0.582952389193
 -0.000002196269  0.000026917816  0.000607676238 -0.012323478086
   15    2   10   10
  91.02284919      12.31824716    
  19762.54400      4952.939600      1693.281500      698.3871200    
  305.4837600      140.5349200      67.86090500      33.70837200    
  17.12325000      8.614081100      4.198487800      1.950851800    
 0.7805844900     0.2816736100     0.9055903700E-01
 -0.000035516954 -0.000016832536
 -0.000284611283 -0.000136390178
 -0.001625426450 -0.000773518567
 -0.007971422446 -0.003846498557
 -0.034452741222 -0.016652095428
 -0.112760560998 -0.055798412441
 -0.260372872329 -0.129200889699
 -0.388612899826 -0.186146689080
 -0.311303568579 -0.067985944645
 -0.098885908138  0.292213270736
 -0.007317980946  0.514715176001
 -0.000565949399  0.306318148151
  0.000057615978  0.044647014135
 -0.000044471753 -0.001239019014
  0.000012315337  0.000294735260
   10    1    7
 0.1339534288    
  383.5737200      131.6883000      56.21669300      26.30729400    
  12.94802400      6.444507800      3.133485100      1.469537900    
 0.6527711300     0.2616560700    
 -0.000585915716
 -0.005123491668
 -0.024738723971
 -0.076955494593
 -0.174882002015
 -0.280264010347
 -0.328001180837
 -0.286324334038
 -0.183707535891
 -0.081264752271
*
Spectral Representation Operator
Core primitive basis
Exchange
End of Spectral Representation Operator
 

/Al.ECP.Seijo.0s.0s.0e-AIMP-Gd3Al5O12-Al(oct).      
Embedding AIMP of Alo(3+) in Gd3Al5O12 
made Sat.Feb.18.04:47:14.CET.2012
   3.000    0
    0    0
*
* External AIMP: 
* Local Pot. Param. : (ECP convention)
*                      A(AIMP)=-Zeff*A(ECP)
*
M1
   12
  372971.1700      57385.37550      13169.30800      3619.437590    
  1148.006930      394.6778150      149.5069970      60.26483830    
  23.41066380      9.773332000      4.340800000      1.918320000    
 0.2198601566E-01 0.2664426227E-01 0.4918798802E-01 0.8351453860E-01
 0.1414585829     0.2358158171     0.3164241946     0.3086037183    
 0.3508531874     0.7579333632     0.8209024114     0.2200092539    
M2
    0
COREREP
   1.000
PROJOP
    1
   11    2    2    2
  116.9206131      9.672177504    
  5908.580000      885.1210000      200.7280000      56.13320000    
  17.16260000      29.59110000      2.997320000      1.069540000    
  1.307260000     0.1651860000     0.6055000000E-01
  0.005666366658  0.001486661712
  0.042199371374  0.011032092946
  0.190348217432  0.054798868018
  0.462111496335  0.144590332067
  0.382432353231  0.138785624237
  0.043211640426  0.073431792116
  0.051220350374 -0.604318179456
  0.066230299669 -0.532543442025
 -0.088926287733  0.022206698320
 -0.002581343362 -0.012903090173
  0.000995653812  0.010359498240
    8    1    6
  6.316689207    
  122.4420000      28.65160000      8.855250000      2.980410000    
  1.001540000     0.3105050000     0.1124240000     0.4102600000E-01
 -0.013941262953
 -0.091716417879
 -0.297487264174
 -0.500107928608
 -0.311543013766
 -0.011872942218
  0.005549483693
 -0.000196930915
*
Spectral Representation Operator
Core primitive basis
Exchange
End of Spectral Representation Operator
 

/Al.ECP.Seijo.0s.0s.0e-AIMP-Gd3Al5O12-Al(tet).      
Embedding AIMP of Alt(3+) in Gd3Al5O12 
made Sat.Feb.18.04:57:02.CET.2012
   3.000    0
    0    0
*
* External AIMP: 
* Local Pot. Param. : (ECP convention)
*                      A(AIMP)=-Zeff*A(ECP)
*
M1
   12
  373644.1700      57242.17550      13135.20800      3611.607590    
  1144.386930      393.3688150      148.8839970      59.87703830    
  23.20256380      9.711662000      4.325120000      1.924140000    
 0.2198558381E-01 0.2672706591E-01 0.4919194286E-01 0.8368693252E-01
 0.1417257126     0.2363538313     0.3170913375     0.3094531129    
 0.3525295979     0.7600683892     0.8141049273     0.2204148995    
M2
    0
COREREP
   1.000
PROJOP
    1
   11    2    2    2
  116.8430226      9.593594386    
  5908.580000      885.1210000      200.7280000      56.13320000    
  17.16260000      29.59110000      2.997320000      1.069540000    
  1.307260000     0.1651860000     0.6055000000E-01
  0.005666377456  0.001486797164
  0.042199407348  0.011034251257
  0.190348739040  0.054799937297
  0.462110407342  0.144673610111
  0.382424287303  0.139044456869
  0.043219362730  0.073235844078
  0.051234158755 -0.605672106253
  0.066373544355 -0.545597600737
 -0.089064305983  0.034589707915
 -0.002626385081 -0.008764368036
  0.001008666819  0.009030859566
    8    1    6
  6.239903739    
  122.4420000      28.65160000      8.855250000      2.980410000    
  1.001540000     0.3105050000     0.1124240000     0.4102600000E-01
 -0.013939462298
 -0.091687515319
 -0.297471251640
 -0.499779530613
 -0.312110648522
 -0.011882592670
  0.006307419307
 -0.000454115244
*
Spectral Representation Operator
Core primitive basis
Exchange
End of Spectral Representation Operator
 

/Al.ECP.Seijo.11s8p.1s1p.0e-AIMP-Gd3Al5O12-Al(tet).      
Embedding AIMP of Alt(3+) in Gd3Al5O12 with orthogonality orbitals
made Sat.Feb.18.04:57:02.CET.2012
   3.000    1
   11    1
  5908.580000      885.1210000      200.7280000      56.13320000    
  17.16260000      29.59110000      2.997320000      1.069540000    
  1.307260000     0.1651860000     0.6055000000E-01
   0.001486797164
   0.011034251257
   0.054799937297
   0.144673610111
   0.139044456869
   0.073235844078
  -0.605672106253
  -0.545597600737
   0.034589707915
  -0.008764368036
   0.009030859566
    8    1
  122.4420000      28.65160000      8.855250000      2.980410000    
  1.001540000     0.3105050000     0.1124240000     0.4102600000E-01
 -0.013939462298
 -0.091687515319
 -0.297471251640
 -0.499779530613
 -0.312110648522
 -0.011882592670
  0.006307419307
 -0.000454115244
*
* External AIMP: 
* Local Pot. Param. : (ECP convention)
*                      A(AIMP)=-Zeff*A(ECP)
*
M1
   12
  373644.1700      57242.17550      13135.20800      3611.607590    
  1144.386930      393.3688150      148.8839970      59.87703830    
  23.20256380      9.711662000      4.325120000      1.924140000    
 0.2198558381E-01 0.2672706591E-01 0.4919194286E-01 0.8368693252E-01
 0.1417257126     0.2363538313     0.3170913375     0.3094531129    
 0.3525295979     0.7600683892     0.8141049273     0.2204148995    
M2
    0
COREREP
   1.000
PROJOP
    1
   11    2    2    2
  116.8430226      9.593594386    
  5908.580000      885.1210000      200.7280000      56.13320000    
  17.16260000      29.59110000      2.997320000      1.069540000    
  1.307260000     0.1651860000     0.6055000000E-01
  0.005666377456  0.001486797164
  0.042199407348  0.011034251257
  0.190348739040  0.054799937297
  0.462110407342  0.144673610111
  0.382424287303  0.139044456869
  0.043219362730  0.073235844078
  0.051234158755 -0.605672106253
  0.066373544355 -0.545597600737
 -0.089064305983  0.034589707915
 -0.002626385081 -0.008764368036
  0.001008666819  0.009030859566
    8    1    6
  6.239903739    
  122.4420000      28.65160000      8.855250000      2.980410000    
  1.001540000     0.3105050000     0.1124240000     0.4102600000E-01
 -0.013939462298
 -0.091687515319
 -0.297471251640
 -0.499779530613
 -0.312110648522
 -0.011882592670
  0.006307419307
 -0.000454115244
*
Spectral Representation Operator
Core primitive basis
Exchange
End of Spectral Representation Operator
 

/O.ECP.Seijo.0s.0s.0e-AIMP-Gd3Al5O12-O.         
Embedding AIMP of O(2-) in Gd3Al5O12 
made Sat.Feb.18.05:06:48.CET.2012
  -2.000    0
    0    0
*
* External AIMP: 
* Local Pot. Param. : (ECP convention)
*                      A(AIMP)=-Zeff*A(ECP)
*
M1
   12
  282885.8300      34740.01200      6502.573000      1486.426000    
  406.8273300      124.8370000      41.98461900      13.81633000    
  4.272136000      1.610321600     0.6078900000     0.2644720000    
 -.2175868911E-01 -.3178360596E-01 -.6530668148E-01 -.1217507468    
 -.2184347872     -.3837134172     -.5101962409     -.4581350570    
 -.7591205749     -1.294889646     -1.063744852     -.7116570074E-01
M2
    0
COREREP
   1.000
PROJOP
    1
    8    2    2    2
  40.38175566      2.021841725    
  2048.050000      309.0990000      70.41410000      19.70120000    
  6.031450000      10.22970000     0.9340900000     0.2862500000    
  0.006202079924  0.001318677222
  0.045639536405  0.009600066527
  0.200057276910  0.046762241136
  0.473808138252  0.114653180678
  0.380728339632  0.098241006820
  0.028999012808  0.069500241067
  0.024613968905 -0.463877833160
 -0.005602898282 -0.640628816518
    6    1    6
 0.5643766011    
  34.97120000      7.845090000      2.303320000     0.7219800000    
 0.2155300000     0.5900000000E-01
 -0.013151073429
 -0.085024091621
 -0.249455255599
 -0.432581818926
 -0.515552569279
  0.093739930792
*
Spectral Representation Operator
Core primitive basis
Exchange
End of Spectral Representation Operator
 
********************************************************************************
*         E.7.X. Er3Al5O12 (ErAG)
********************************************************************************
*           E.7.X.a. Er3Al5O12
*             Structure:
*                    B.Etschmann et al., Acta Cryst Sec B 57(2) (2001) 136-141
*                    (Ia-3d; a=11.9928, x=-0.03039, =0.05124, z=0.14915)
*             Embedding potentials:
*                    L.Seijo, Z.Barandiaran, to be published
*                    Out of SCEI DKH-HF calculations
*             /Er.ECP.Seijo.0s.0s.0e-AIMP-Er3Al5O12-Er.
*             /Al.ECP.Seijo.0s.0s.0e-AIMP-Er3Al5O12-Al(oct).
*             /Al.ECP.Seijo.0s.0s.0e-AIMP-Er3Al5O12-Al(tet).
*             /Al.ECP.Seijo.11s8p.1s1p.0e-AIMP-Er3Al5O12-Al(tet).
*             /O.ECP.Seijo.0s.0s.0e-AIMP-Er3Al5O12-O.
********************************************************************************
/Er.ECP.Seijo.0s.0s.0e-AIMP-Er3Al5O12-Er.       
Embedding AIMP of Er(3+) in Er3Al5O12 
made Fri.Feb.17.20:50:21.CET.2012
   3.000    0
    0    0
*
* External AIMP: 
* Local Pot. Param. : (ECP convention)
*                      A(AIMP)=-Zeff*A(ECP)
*
M1
   15
  525610.0000      107604.0000      31856.00000      10585.90000    
  3817.400000      1410.390000      553.9600000      256.8000000    
  88.30300000      48.24700000      10.23460000      5.658800000    
  2.156780000      1.064180000     0.5717600000    
 0.1985680216     0.1858236785     0.3071453369     0.4780853047    
 0.6465722713     0.8256610922      1.474356458      1.590874988    
  1.767838831      3.760195434      4.023514287      2.861334982    
  1.775952150      1.536042019     0.2347018090    
M2
    0
COREREP
   1.000
PROJOP
    3
   27    5    2    2    2    2    2
  4240.028499      722.4049857      166.2304541      34.98838383    
  4.563523160    
 0.6815423700E+11  6494725000.      1053434400.      219738650.0    
  52529925.00      14149958.00      4252331.200      1345509.500    
  449307.9100      159715.3600      59453.99700      23261.38600    
  9501.942300      4026.108900      1769.092400      799.3869800    
  370.1864100      162.5686600      75.86811200      30.97710400    
  16.02521600      6.376377900      3.116806700     0.8540113000    
 0.3782035200     0.6099377000E-01 0.2496815400E-01
  0.000000038382 -0.000000003051 -0.000000012028 -0.000000001935  0.000000001184
 -0.000000193814  0.000000016641  0.000000060132  0.000000009197 -0.000000005963
  0.000000784853 -0.000000096870 -0.000000229167 -0.000000023589  0.000000024109
 -0.000004366573  0.000001053216  0.000001025241 -0.000000107100 -0.000000136110
  0.000514017863 -0.000188197828 -0.000089623955  0.000042370467  0.000016569580
  0.000633177733 -0.000237432825 -0.000107987005  0.000054742566  0.000020548357
  0.001659006553 -0.000606198143 -0.000291620661  0.000135840456  0.000053417128
  0.003434239064 -0.001289519287 -0.000590793074  0.000296682339  0.000112924520
  0.007023071866 -0.002593744251 -0.001242970484  0.000583365432  0.000224077376
  0.014160212576 -0.005357006759 -0.002493483639  0.001229667519  0.000495257736
  0.028362040562 -0.010792460285 -0.005111189786  0.002463570551  0.000962200016
  0.055881102659 -0.021916823359 -0.010341211792  0.005039349006  0.001995406732
  0.109180344383 -0.044379949514 -0.021202136984  0.010293825650  0.004057815852
  0.199728175758 -0.088284165550 -0.042445646024  0.020760375393  0.008207614793
  0.308285763817 -0.154542137779 -0.076781555609  0.037570293462  0.014859225954
  0.318441210553 -0.203491203176 -0.103852511374  0.051784422047  0.020543558787
  0.144321405832 -0.029158920219 -0.011759900559  0.004477701160  0.001723523045
  0.012460632748  0.486550382121  0.403599777113 -0.221303765434 -0.089927346574
 -0.000364601702  0.564279485928  0.611808059000 -0.376033935847 -0.156522930471
 -0.000000378336  0.105513788496 -0.422156499029  0.404491895678  0.185038051363
 -0.000019237816 -0.016953045088 -0.845641518235  1.021799479935  0.502289509415
  0.000001305908  0.005783424978 -0.121218247849 -0.586960818652 -0.426107810173
  0.000005843354 -0.002651843473  0.014596042282 -0.881406551011 -0.798260089307
 -0.000001927868  0.000800216769 -0.003674520749 -0.054367982505  0.800523587903
  0.000000394955 -0.000376874846  0.001718400706  0.012521284014  0.569925172849
 -0.000000143927  0.000096591557 -0.000412897972 -0.002320896213 -0.012567709870
  0.000000134224 -0.000046711108  0.000197922384  0.001108551203  0.000898752647
   23    4    6    6    6    6
  640.5155862      140.6644629      26.33341537      2.247593505    
  53962859.00      7689113.000      1583279.600      401396.9400    
  118187.0800      39214.58900      14420.88000      5787.044400    
  2495.811600      1143.878000      551.7695900      277.7404900    
  145.0434300      77.62746100      41.89157900      23.20015700    
  12.83752400      6.998895500      3.739198200      1.927785900    
 0.9125030400     0.4149417000     0.1723135700    
  0.000000654856  0.000000403190  0.000000089652  0.000000121276
  0.000024702321  0.000011983796  0.000006170604  0.000001669451
  0.000063165787  0.000032644088  0.000014101886  0.000006117256
  0.000181190597  0.000088086746  0.000045387668  0.000011897094
  0.000490014536  0.000247545650  0.000115889581  0.000045037773
  0.001346360784  0.000675805322  0.000325209065  0.000114245105
  0.003731636437  0.001886946787  0.000902598186  0.000326285828
  0.010452707818  0.005324267597  0.002557100755  0.000915833409
  0.028825038286  0.014881798461  0.007161106368  0.002581090165
  0.074373155027  0.039317206419  0.019038263410  0.006834721581
  0.165789112140  0.091019885597  0.044424573172  0.016069080883
  0.288294364026  0.166618317837  0.082486712318  0.029687367224
  0.339338351140  0.198843679732  0.098459951254  0.035953363363
  0.221028586820  0.038610742232  0.003409503059 -0.000844987065
  0.059169972464 -0.320920181518 -0.235225312787 -0.090064281081
  0.003383572627 -0.504191344383 -0.405783902636 -0.165778647625
  0.000507593133 -0.259336726904 -0.068112269835 -0.001975626062
 -0.000323098664 -0.040304205643  0.490227814060  0.246863255584
  0.000068514862 -0.002582214606  0.540218009192  0.348228167038
 -0.000054189488 -0.000092136509  0.166631821591 -0.053391263237
  0.000020581784 -0.000058825647  0.009091589688 -0.521374455707
 -0.000007316864  0.000020665904  0.001217511659 -0.555070383907
  0.000001788611 -0.000002080911  0.000414902428 -0.038209063940
   15    2   10   10
  107.7325921      14.31256048    
  16417.39100      4243.158500      1504.243400      624.5190000    
  285.2500700      138.8301100      70.91460500      37.41041800    
  20.25288000      10.98436500      5.850306200      3.076831600    
  1.569470200     0.7294560600     0.2119263500    
 -0.000067394509  0.000032509320
 -0.000491307894  0.000238170121
 -0.002767553631  0.001342111958
 -0.012779192871  0.006255374872
 -0.046886992489  0.023125814064
 -0.132025825889  0.066523563353
 -0.265999224781  0.133948043388
 -0.360102712828  0.172720490055
 -0.281876547884  0.061411551397
 -0.104650853626 -0.229184178041
 -0.013993024680 -0.436381930623
 -0.000901534965 -0.351104858858
 -0.000158079543 -0.127303893352
 -0.000045497721 -0.015656252153
 -0.000002046170 -0.000189796479
   10    1   11
 0.7108756672    
  381.1632200      130.8142600      56.03233700      26.27419500    
  12.97999000      6.460467000      3.150351700      1.468914200    
 0.6328070700     0.2362446200    
  0.000953933993
  0.008062984464
  0.036339430313
  0.106298677530
  0.217016968107
  0.306564605350
  0.321322497215
  0.254545719863
  0.143217692837
  0.036799001958
*
Spectral Representation Operator
Core primitive basis
Exchange
End of Spectral Representation Operator
 

/Al.ECP.Seijo.0s.0s.0e-AIMP-Er3Al5O12-Al(oct).      
Embedding AIMP of Alo(3+) in Er3Al5O12 
made Fri.Feb.17.21:00:05.CET.2012
   3.000    0
    0    0
*
* External AIMP: 
* Local Pot. Param. : (ECP convention)
*                      A(AIMP)=-Zeff*A(ECP)
*
M1
   12
  372971.1700      57385.37550      13169.30800      3619.437590    
  1148.006930      394.6778150      149.5069970      60.26483830    
  23.41066380      9.773332000      4.340800000      1.918320000    
 0.2198254806E-01 0.2664787894E-01 0.4916958515E-01 0.8353936549E-01
 0.1413854432     0.2359163505     0.3161776485     0.3089485411    
 0.3501218957     0.7589264459     0.8190837669     0.2214338639    
M2
    0
COREREP
   1.000
PROJOP
    1
   11    2    2    2
  116.9560579      9.707007407    
  5908.580000      885.1210000      200.7280000      56.13320000    
  17.16260000      29.59110000      2.997320000      1.069540000    
  1.307260000     0.1651860000     0.6055000000E-01
  0.005666376151  0.001486365336
  0.042199459832  0.011028952256
  0.190348569031  0.054791224605
  0.462113340400  0.144504560497
  0.382433848233  0.138552397977
  0.043210449430  0.073585293256
  0.051202572777 -0.603341658305
  0.066137850889 -0.525122413437
 -0.088829370321  0.015246463416
 -0.002554444000 -0.016092234124
  0.000983901548  0.011688638112
    8    1    6
  6.350176580    
  122.4420000      28.65160000      8.855250000      2.980410000    
  1.001540000     0.3105050000     0.1124240000     0.4102600000E-01
 -0.013939133879
 -0.091712811794
 -0.297432152143
 -0.500125068070
 -0.311063822073
 -0.012678012088
  0.004577818860
  0.000766919120
*
Spectral Representation Operator
Core primitive basis
Exchange
End of Spectral Representation Operator
 

/Al.ECP.Seijo.0s.0s.0e-AIMP-Er3Al5O12-Al(tet).      
Embedding AIMP of Alt(3+) in Er3Al5O12 
made Fri.Feb.17.21:10:20.CET.2012
   3.000    0
    0    0
*
* External AIMP: 
* Local Pot. Param. : (ECP convention)
*                      A(AIMP)=-Zeff*A(ECP)
*
M1
   12
  373644.1700      57242.17550      13135.20800      3611.607590    
  1144.386930      393.3688150      148.8839970      59.87703830    
  23.20256380      9.711662000      4.325120000      1.924140000    
 0.2198124252E-01 0.2673134573E-01 0.4916919572E-01 0.8371684456E-01
 0.1416355736     0.2364753971     0.3167885669     0.3098765570    
 0.3516236985     0.7613060820     0.8117974067     0.2222314231    
M2
    0
COREREP
   1.000
PROJOP
    1
   11    2    2    2
  116.8404405      9.590975969    
  5908.580000      885.1210000      200.7280000      56.13320000    
  17.16260000      29.59110000      2.997320000      1.069540000    
  1.307260000     0.1651860000     0.6055000000E-01
  0.005666388501  0.001486340939
  0.042199509200  0.011029922630
  0.190349166349  0.054786373294
  0.462112453034  0.144571829254
  0.382425754325  0.138793425066
  0.043218174690  0.073381684931
  0.051213079131 -0.604599691153
  0.066258582105 -0.537493431134
 -0.088945296371  0.027219751693
 -0.002586817808 -0.012946850446
  0.000990329478  0.010848565450
    8    1    6
  6.234737711    
  122.4420000      28.65160000      8.855250000      2.980410000    
  1.001540000     0.3105050000     0.1124240000     0.4102600000E-01
 -0.013936882522
 -0.091685501504
 -0.297401246715
 -0.499831237390
 -0.311419877836
 -0.013221629777
  0.005794257495
  0.000375814512
*
Spectral Representation Operator
Core primitive basis
Exchange
End of Spectral Representation Operator
 

/Al.ECP.Seijo.11s8p.1s1p.0e-AIMP-Er3Al5O12-Al(tet).      
Embedding AIMP of Alt(3+) in Er3Al5O12 with orthogonality orbitals
made Fri.Feb.17.21:10:20.CET.2012
   3.000    1
   11    1
  5908.580000      885.1210000      200.7280000      56.13320000    
  17.16260000      29.59110000      2.997320000      1.069540000    
  1.307260000     0.1651860000     0.6055000000E-01
   0.001486340939
   0.011029922630
   0.054786373294
   0.144571829254
   0.138793425066
   0.073381684931
  -0.604599691153
  -0.537493431134
   0.027219751693
  -0.012946850446
   0.010848565450
    8    1 
  122.4420000      28.65160000      8.855250000      2.980410000    
  1.001540000     0.3105050000     0.1124240000     0.4102600000E-01
 -0.013936882522
 -0.091685501504
 -0.297401246715
 -0.499831237390
 -0.311419877836
 -0.013221629777
  0.005794257495
  0.000375814512
*
* External AIMP: 
* Local Pot. Param. : (ECP convention)
*                      A(AIMP)=-Zeff*A(ECP)
*
M1
   12
  373644.1700      57242.17550      13135.20800      3611.607590    
  1144.386930      393.3688150      148.8839970      59.87703830    
  23.20256380      9.711662000      4.325120000      1.924140000    
 0.2198124252E-01 0.2673134573E-01 0.4916919572E-01 0.8371684456E-01
 0.1416355736     0.2364753971     0.3167885669     0.3098765570    
 0.3516236985     0.7613060820     0.8117974067     0.2222314231    
M2
    0
COREREP
   1.000
PROJOP
    1
   11    2    2    2
  116.8404405      9.590975969    
  5908.580000      885.1210000      200.7280000      56.13320000    
  17.16260000      29.59110000      2.997320000      1.069540000    
  1.307260000     0.1651860000     0.6055000000E-01
  0.005666388501  0.001486340939
  0.042199509200  0.011029922630
  0.190349166349  0.054786373294
  0.462112453034  0.144571829254
  0.382425754325  0.138793425066
  0.043218174690  0.073381684931
  0.051213079131 -0.604599691153
  0.066258582105 -0.537493431134
 -0.088945296371  0.027219751693
 -0.002586817808 -0.012946850446
  0.000990329478  0.010848565450
    8    1    6
  6.234737711    
  122.4420000      28.65160000      8.855250000      2.980410000    
  1.001540000     0.3105050000     0.1124240000     0.4102600000E-01
 -0.013936882522
 -0.091685501504
 -0.297401246715
 -0.499831237390
 -0.311419877836
 -0.013221629777
  0.005794257495
  0.000375814512
*
Spectral Representation Operator
Core primitive basis
Exchange
End of Spectral Representation Operator
 

/O.ECP.Seijo.0s.0s.0e-AIMP-Er3Al5O12-O.         
Embedding AIMP of O(2-) in Er3Al5O12 
made Fri.Feb.17.21:20:27.CET.2012
  -2.000    0
    0    0
*
* External AIMP: 
* Local Pot. Param. : (ECP convention)
*                      A(AIMP)=-Zeff*A(ECP)
*
M1
   12
  282885.8300      34740.01200      6502.573000      1486.426000    
  406.8273300      124.8370000      41.98461900      13.81633000    
  4.272136000      1.610321600     0.6078900000     0.2644720000    
 -.2176606811E-01 -.3180713648E-01 -.6531016150E-01 -.1218615432    
 -.2184162577     -.3840597788     -.5100999142     -.4592414887    
 -.7582972445     -1.302188713     -1.058202465     -.6874922902E-01
M2
    0
COREREP
   1.000
PROJOP
    1
    8    2    2    2
  40.28744534      1.936494479    
  2048.050000      309.0990000      70.41410000      19.70120000    
  6.031450000      10.22970000     0.9340900000     0.2862500000    
  0.006201990834  0.001318991902
  0.045638879638  0.009608119356
  0.200053998492  0.046752643451
  0.473799242030  0.115000566176
  0.380738286868  0.099343690018
  0.028988180152  0.068542156348
  0.024653435853 -0.465324178922
 -0.005617102524 -0.639478124830
    6    1    6
 0.4770521825    
  34.97120000      7.845090000      2.303320000     0.7219800000    
 0.2155300000     0.5900000000E-01
 -0.013148638202
 -0.085226601650
 -0.248952164516
 -0.435996161302
 -0.511757254835
  0.093342274785
*
Spectral Representation Operator
Core primitive basis
Exchange
End of Spectral Representation Operator
 
********************************************************************************
*         E.7.X. Yb3Al5O12 (YbAG)
********************************************************************************
*           E.7.X.a. Yb3Al5O12
*             Structure:
*                    F.Euler, J.A.Bruce, Acta Cryst. (1965) 19, 971
*                    (Ia-3d; a=11.931A, x=-0.0296, =0.0529, z=0.1504)
*             Embedding potentials:
*                    L.Seijo, Z.Barandiaran, to be published
*                    Out of SCEI DKH-HF calculations
*             /Yb.ECP.Seijo.0s.0s.0e-AIMP-Yb3Al5O12-Yb.
*             /Al.ECP.Seijo.0s.0s.0e-AIMP-Yb3Al5O12-Al(oct).
*             /Al.ECP.Seijo.0s.0s.0e-AIMP-Yb3Al5O12-Al(tet).
*             /Al.ECP.Seijo.11s8p.1s1p.0e-AIMP-Yb3Al5O12-Al(tet).
*             /O.ECP.Seijo.0s.0s.0e-AIMP-Yb3Al5O12-O.
********************************************************************************
/Yb.ECP.Seijo.0s.0s.0e-AIMP-Yb3Al5O12-Yb.       
Embedding AIMP of Yb(3+) in Yb3Al5O12 
made Fri.Feb.17.02:36:49.CET.2012
   3.000    0
    0    0
*
* External AIMP: 
* Local Pot. Param. : (ECP convention)
*                      A(AIMP)=-Zeff*A(ECP)
*
M1
   15
  499890.0000      97959.00000      28077.00000      9139.200000    
  3222.900000      1151.840000      464.5700000      213.4200000    
  77.56500000      47.72800000      10.81590000      5.650200000    
  2.113180000      1.031310000     0.5557800000    
 0.2159281868     0.2109315607     0.3501844873     0.5382529384    
 0.7089071980     0.9846735068      1.755026912      1.268239739    
  2.544818265      2.842389692      4.524440829      2.894619179    
  1.979815758      1.367404517     0.1477005716    
M2
    0
COREREP
   1.000
PROJOP
    3
   27    5    2    2    2    2    2
  4522.983009      776.6301156      179.4378952      37.53526591    
  4.785966182    
 0.7167191700E+11  6852841700.      1106179400.      229631520.0    
  55103176.00      14844859.00      4330035.300      1362292.700    
  455129.5400      160284.0500      59517.78700      23205.18500    
  9486.296400      4034.797200      1776.829900      806.2923500    
  375.3039600      170.0975800      80.21751000      33.23581400    
  17.20624400      6.885913100      3.358038400     0.9118131500    
 0.3990368400     0.6304972100E-01 0.2556606500E-01
  0.000000972204  0.000000353668  0.000000177809 -0.000000077653  0.000000033643
 -0.000004784466 -0.000001740516 -0.000000875023  0.000000382167 -0.000000165552
  0.000016802653  0.000006112463  0.000003073077 -0.000001342084  0.000000581377
 -0.000048255750 -0.000017549205 -0.000008830014  0.000003851123 -0.000001670933
  0.000110573442  0.000040081844  0.000020343985 -0.000008744541  0.000003862787
  0.001261511436  0.000472380180  0.000219018368 -0.000109051117  0.000040812384
  0.001371754353  0.000506977475  0.000246540614 -0.000113853297  0.000045498006
  0.004190320165  0.001579558824  0.000729232984 -0.000366092727  0.000137843805
  0.007372931088  0.002758025462  0.001327826337 -0.000624627706  0.000239987868
  0.015890996774  0.006056896251  0.002834074960 -0.001399679447  0.000555251012
  0.030769564654  0.011848262131  0.005637609136 -0.002725246917  0.001057284517
  0.060913075109  0.024149861402  0.011452853629 -0.005596005246  0.002193970735
  0.116213901661  0.047964103045  0.023041445661 -0.011217282074  0.004382762405
  0.209027963974  0.093836773022  0.045387171599 -0.022271208614  0.008725489945
  0.313046402591  0.160632643712  0.080413442198 -0.039460520235  0.015465025127
  0.307688146961  0.198188009134  0.101677240264 -0.050939430773  0.020033050022
  0.129087263184  0.005372303952 -0.002887272143  0.003345724483 -0.001415147991
  0.009643850925 -0.494583283702 -0.417684762093  0.230228020017 -0.092745960253
  0.000214360278 -0.548253729443 -0.597701319211  0.370641130663 -0.153071007984
 -0.000283623648 -0.100533155255  0.440384984477 -0.428013413806  0.194484380408
  0.000148172201  0.015222322196  0.835473349729 -1.009071372064  0.490774861564
 -0.000073758337 -0.005103608344  0.119006445937  0.598170210545 -0.428496269898
  0.000041652913  0.002305623842 -0.014020117270  0.873974812115 -0.781679214498
 -0.000012948638 -0.000677690194  0.003507960075  0.054199233647  0.794086524397
  0.000005368020  0.000314596818 -0.001627382237 -0.012664842694  0.569009493368
 -0.000001388143 -0.000080277983  0.000390740735  0.002396883431 -0.011904109051
  0.000000820951  0.000039110428 -0.000187774116 -0.001157673797  0.000627461360
   23    4    6    6    6    6
  686.5082184      151.5664734      28.14424332      2.323320724    
  54522375.00      7756402.200      1591450.300      401990.8200    
  118400.3300      39288.98900      14434.44400      5789.641700    
  2497.817000      1143.668800      551.5359100      277.6847600    
  144.9833300      77.52811200      41.79454800      23.21254600    
  12.92239700      7.019198300      3.751671900      1.930185600    
 0.9226218900     0.4216174200     0.1753719100    
 -0.000001387232 -0.000000753193  0.000000264954  0.000000165833
 -0.000027914767 -0.000013752789  0.000007012010  0.000001994124
 -0.000072371201 -0.000037185919  0.000016437752  0.000006677459
 -0.000205824200 -0.000101695034  0.000051857105  0.000014371815
 -0.000555587446 -0.000281712857  0.000132766340  0.000050039259
 -0.001520187787 -0.000768630119  0.000370688827  0.000128820820
 -0.004201940295 -0.002139152798  0.001026603959  0.000365082234
 -0.011677658678 -0.005992751681  0.002887715919  0.001019361233
 -0.031964396804 -0.016638387612  0.008033191731  0.002850842799
 -0.081634615796 -0.043569301031  0.021182336430  0.007494737115
 -0.178290063936 -0.098948753444  0.048487819893  0.017270398769
 -0.300725246212 -0.175801611278  0.087485049136  0.031042890408
 -0.336123217168 -0.194972198215  0.096173910816  0.034521744415
 -0.201435833140 -0.003332570263 -0.018516416565 -0.008925755782
 -0.046963374046  0.368079153396 -0.273787282388 -0.103993279761
 -0.002135933951  0.488741391830 -0.395063569684 -0.158377882045
 -0.000316366375  0.220337810278  0.007857111741  0.032159833657
  0.000226500359  0.030843206467  0.529564627380  0.265533276862
 -0.000028601440  0.001471723791  0.500452173327  0.319811579941
  0.000029722109  0.000284739541  0.134534776975 -0.100230919499
 -0.000011109369 -0.000042536026  0.006292586817 -0.523411324047
  0.000003689131  0.000019311961  0.001143226721 -0.530210782583
 -0.000000857118  0.000008511859 -0.000393024542 -0.031733012834
   15    2   10   10
  116.5001085      15.32171548    
  18187.93200      4693.706000      1574.519500      630.4675200    
  284.5339500      138.5752100      70.87766300      37.39173500    
  20.23540500      10.97915700      5.849528600      3.056691800    
  1.522995800     0.6515698300     0.8572807700E-01
 -0.000065296375 -0.000031678537
 -0.000496457351 -0.000241841300
 -0.003095711288 -0.001510528516
 -0.014784091776 -0.007278538850
 -0.053387300308 -0.026531199803
 -0.145645237734 -0.073921733396
 -0.283480004120 -0.143323257298
 -0.364310961060 -0.172200322931
 -0.259987566513 -0.029673092444
 -0.085895375611  0.267112677428
 -0.010103074020  0.441218913145
 -0.000802301377  0.326043166484
 -0.000146607319  0.104881210951
 -0.000039314022  0.009190770007
  0.000000653884  0.000191174512
   10    1   13
  1.015983787    
  936.4792500      236.1678500      88.82383000      38.89926000    
  18.23438400      8.741668500      4.099379700      1.835545100    
 0.7588106600     0.2727080100    
  0.000193430844
  0.003146187611
  0.020637371760
  0.076074918288
  0.188458291179
  0.306660252028
  0.348499719087
  0.285350738429
  0.159554212983
  0.038894970279
*
Spectral Representation Operator
Core primitive basis
Exchange
End of Spectral Representation Operator
 

/Al.ECP.Seijo.0s.0s.0e-AIMP-Yb3Al5O12-Al(oct).      
Embedding AIMP of Alo(3+) in Yb3Al5O12 
made Fri.Feb.17.02:51:26.CET.2012
   3.000    0
    0    0
*
* External AIMP: 
* Local Pot. Param. : (ECP convention)
*                      A(AIMP)=-Zeff*A(ECP)
*
M1
   12
  372971.1700      57385.37550      13169.30800      3619.437590    
  1148.006930      394.6778150      149.5069970      60.26483830    
  23.41066380      9.773332000      4.340800000      1.918320000    
 0.2198276462E-01 0.2664807074E-01 0.4917016183E-01 0.8353982731E-01
 0.1413872085     0.2359171775     0.3161824758     0.3089496097    
 0.3501404994     0.7589328584     0.8191336161     0.2213490634    
M2
    0
COREREP
   1.000
PROJOP
    1
   11    2    2    2
  116.9337418      9.684819934    
  5908.580000      885.1210000      200.7280000      56.13320000    
  17.16260000      29.59110000      2.997320000      1.069540000    
  1.307260000     0.1651860000     0.6055000000E-01
  0.005666374417  0.001486370543
  0.042199454495  0.011028879194
  0.190348479348  0.054791795504
  0.462113558001  0.144498296802
  0.382435189354  0.138529450698
  0.043209152565  0.073605028761
  0.051200482517 -0.603222041656
  0.066121047158 -0.524064547650
 -0.088812164666  0.014190540000
 -0.002551851990 -0.016171380237
  0.000984593531  0.011483075606
    8    1    6
  6.327877532    
  122.4420000      28.65160000      8.855250000      2.980410000    
  1.001540000     0.3105050000     0.1124240000     0.4102600000E-01
  0.013939530746
  0.091715745187
  0.297440152972
  0.500148814095
  0.311069318869
  0.012506544024
 -0.004368759977
 -0.000779117804
*
Spectral Representation Operator
Core primitive basis
Exchange
End of Spectral Representation Operator
 

/Al.ECP.Seijo.0s.0s.0e-AIMP-Yb3Al5O12-Al(tet).      
Embedding AIMP of Alt(3+) in Yb3Al5O12 
made Fri.Feb.17.03:06:03.CET.2012
   3.000    0
    0    0
*
* External AIMP: 
* Local Pot. Param. : (ECP convention)
*                      A(AIMP)=-Zeff*A(ECP)
*
M1
   12
  373644.1700      57242.17550      13135.20800      3611.607590    
  1144.386930      393.3688150      148.8839970      59.87703830    
  23.20256380      9.711662000      4.325120000      1.924140000    
 0.2198123579E-01 0.2673101373E-01 0.4916962472E-01 0.8371525679E-01
 0.1416376887     0.2364697856     0.3167966372     0.3098594923    
 0.3516467143     0.7612504355     0.8118431768     0.2222322720    
M2
    0
COREREP
   1.000
PROJOP
    1
   11    2    2    2
  116.8487581      9.599314765    
  5908.580000      885.1210000      200.7280000      56.13320000    
  17.16260000      29.59110000      2.997320000      1.069540000    
  1.307260000     0.1651860000     0.6055000000E-01
  0.005666389460  0.001486332463
  0.042199511861  0.011029974858
  0.190349217198  0.054785662022
  0.462112318776  0.144577941135
  0.382424942874  0.138816917876
  0.043218941597  0.073360962937
  0.051214393843 -0.604716792098
  0.066270582767 -0.538604161551
 -0.088957170754  0.028314138045
 -0.002589294852 -0.012746495020
  0.000990563171  0.010866857506
    8    1    6
  6.243062870    
  122.4420000      28.65160000      8.855250000      2.980410000    
  1.001540000     0.3105050000     0.1124240000     0.4102600000E-01
 -0.013936765925
 -0.091683933762
 -0.297399824956
 -0.499812977616
 -0.311437957808
 -0.013317831933
  0.006008080496
  0.000375480021
*
Spectral Representation Operator
Core primitive basis
Exchange
End of Spectral Representation Operator
 

/Al.ECP.Seijo.11s8p.1s1p.0e-AIMP-Yb3Al5O12-Al(tet).      
Embedding AIMP of Alt(3+) in Yb3Al5O12 with orthogonality orbitals
made Fri.Feb.17.03:06:03.CET.2012
   3.000    1
   11    1
  5908.580000      885.1210000      200.7280000      56.13320000    
  17.16260000      29.59110000      2.997320000      1.069540000    
  1.307260000     0.1651860000     0.6055000000E-01
   0.001486332463
   0.011029974858
   0.054785662022
   0.144577941135
   0.138816917876
   0.073360962937
  -0.604716792098
  -0.538604161551
   0.028314138045
  -0.012746495020
   0.010866857506
    8    1 
  122.4420000      28.65160000      8.855250000      2.980410000    
  1.001540000     0.3105050000     0.1124240000     0.4102600000E-01
 -0.013936765925
 -0.091683933762
 -0.297399824956
 -0.499812977616
 -0.311437957808
 -0.013317831933
  0.006008080496
  0.000375480021
*
* External AIMP: 
* Local Pot. Param. : (ECP convention)
*                      A(AIMP)=-Zeff*A(ECP)
*
M1
   12
  373644.1700      57242.17550      13135.20800      3611.607590    
  1144.386930      393.3688150      148.8839970      59.87703830    
  23.20256380      9.711662000      4.325120000      1.924140000    
 0.2198123579E-01 0.2673101373E-01 0.4916962472E-01 0.8371525679E-01
 0.1416376887     0.2364697856     0.3167966372     0.3098594923    
 0.3516467143     0.7612504355     0.8118431768     0.2222322720    
M2
    0
COREREP
   1.000
PROJOP
    1
   11    2    2    2
  116.8487581      9.599314765    
  5908.580000      885.1210000      200.7280000      56.13320000    
  17.16260000      29.59110000      2.997320000      1.069540000    
  1.307260000     0.1651860000     0.6055000000E-01
  0.005666389460  0.001486332463
  0.042199511861  0.011029974858
  0.190349217198  0.054785662022
  0.462112318776  0.144577941135
  0.382424942874  0.138816917876
  0.043218941597  0.073360962937
  0.051214393843 -0.604716792098
  0.066270582767 -0.538604161551
 -0.088957170754  0.028314138045
 -0.002589294852 -0.012746495020
  0.000990563171  0.010866857506
    8    1    6
  6.243062870    
  122.4420000      28.65160000      8.855250000      2.980410000    
  1.001540000     0.3105050000     0.1124240000     0.4102600000E-01
 -0.013936765925
 -0.091683933762
 -0.297399824956
 -0.499812977616
 -0.311437957808
 -0.013317831933
  0.006008080496
  0.000375480021
*
Spectral Representation Operator
Core primitive basis
Exchange
End of Spectral Representation Operator
 

/O.ECP.Seijo.0s.0s.0e-AIMP-Yb3Al5O12-O.         
Embedding AIMP of O(2-) in Yb3Al5O12 
made Fri.Feb.17.03:20:58.CET.2012
  -2.000    0
    0    0
*
* External AIMP: 
* Local Pot. Param. : (ECP convention)
*                      A(AIMP)=-Zeff*A(ECP)
*
M1
   12
  282885.8300      34740.01200      6502.573000      1486.426000    
  406.8273300      124.8370000      41.98461900      13.81633000    
  4.272136000      1.610321600     0.6078900000     0.2644720000    
 -.2176864535E-01 -.3181862800E-01 -.6530661676E-01 -.1219182401    
 -.2183871253     -.3842386243     -.5099988702     -.4598327965    
 -.7577466554     -1.305442921     -1.055922629     -.6761824745E-01
M2
    0
COREREP
   1.000
PROJOP
    1
    8    2    2    2
  40.28489169      1.937758953    
  2048.050000      309.0990000      70.41410000      19.70120000    
  6.031450000      10.22970000     0.9340900000     0.2862500000    
  0.006201952875  0.001318802953
  0.045638661178  0.009608200138
  0.200052457989  0.046740497074
  0.473798293673  0.115064242415
  0.380750953793  0.099606715215
  0.028975271873  0.068279451784
  0.024664384367 -0.465399436793
 -0.005622075779 -0.639446822698
    6    1    6
 0.4776803905    
  34.97120000      7.845090000      2.303320000     0.7219800000    
 0.2155300000     0.5900000000E-01
 -0.013149449214
 -0.085328876219
 -0.248760668012
 -0.437401099258
 -0.510502178626
  0.094004846471
*
Spectral Representation Operator
Core primitive basis
Exchange
End of Spectral Representation Operator
 
********************************************************************************
*         E.7.X. Lu3Al5O12 (LuAG)
********************************************************************************
*           E.7.X.a. Lu3Al5O12
*             Structure:
*                    F.Euler, J.A.Bruce, Acta Cryst. (1965) 19, 971
*                    (Ia-3d; a=11.906A, x=-0.0294, =0.0537, z=0.1509)
*             Embedding potentials:
*                    L.Seijo, Z.Barandiaran, to be published
*                    Out of SCEI DKH-HF calculations
*             /Lu.ECP.Seijo.0s.0s.0e-AIMP-Lu3Al5O12-Lu.
*             /Al.ECP.Seijo.0s.0s.0e-AIMP-Lu3Al5O12-Al(oct).
*             /Al.ECP.Seijo.0s.0s.0e-AIMP-Lu3Al5O12-Al(tet).
*             /Al.ECP.Seijo.11s8p.1s1p.0e-AIMP-Lu3Al5O12-Al(tet).
*             /O.ECP.Seijo.0s.0s.0e-AIMP-Lu3Al5O12-O.
********************************************************************************
/Lu.ECP.Seijo.0s.0s.0e-AIMP-Lu3Al5O12-Lu.       
Embedding AIMP of Lu(3+) in Lu3Al5O12 
made Fri.Feb.17.01:36:53.CET.2012
   3.000    0
    0    0
*
* External AIMP: 
* Local Pot. Param. : (ECP convention)
*                      A(AIMP)=-Zeff*A(ECP)
*
M1
   13
  441130.0000      78986.00000      21089.00000      6510.300000    
  2144.800000      727.2900000      305.4500000      95.42200000    
  51.83800000      11.05620000      5.304800000      1.810700000    
 0.8236900000    
 0.2406104706     0.2557911349     0.4332980538     0.6520033132    
 0.8507098755      1.482515705      1.855953958      2.131329431    
  3.592325977      4.949328033      2.981965029      2.335286672    
 0.9055490148    
M2
    0
COREREP
   1.000
PROJOP
    3
   27    5    2    2    2    2    2
  4669.345220      804.7914108      186.2968143      38.85973666    
  4.911110268    
 0.6701311900E+11  7216717800.      1171529200.      235233120.0    
  55877724.00      14949778.00      4363017.000      1375340.500    
  456540.5200      160435.3700      59637.10400      23233.14400    
  9474.040900      4032.731300      1779.753900      807.8776800    
  374.9260700      172.1622700      81.75905400      34.04620200    
  17.67359800      7.084092600      3.479507300     0.9931652500    
 0.4458321400     0.7721303500E-01 0.3053352200E-01
  0.000006147468 -0.000002298641  0.000001084758  0.000000527787  0.000000205528
  0.000020931236 -0.000007825322  0.000003692529  0.000001796663  0.000000699652
  0.000062010885 -0.000023178514  0.000010937943  0.000005321691  0.000002072335
  0.000163070534 -0.000060961145  0.000028764725  0.000013996176  0.000005450381
  0.000388421844 -0.000145244405  0.000068548197  0.000033350956  0.000012987222
  0.000880589308 -0.000329631346  0.000155562480  0.000075698766  0.000029479375
  0.001896176647 -0.000710914102  0.000335688331  0.000163331815  0.000063602768
  0.003969345446 -0.001493442687  0.000705264204  0.000343284722  0.000133697431
  0.008184691832 -0.003095083350  0.001463851515  0.000712378478  0.000277405269
  0.016333838844 -0.006239878052  0.002952617134  0.001438352161  0.000560325697
  0.032283113925 -0.012510543906  0.005944465047  0.002894356520  0.001127121231
  0.063253160249 -0.025215165649  0.012001072146  0.005859420997  0.002283953211
  0.120486791932 -0.050097667226  0.024118787560  0.011764713068  0.004582892412
  0.213420555007 -0.096617889557  0.046869527128  0.023031159219  0.008990737627
  0.315160709262 -0.163495423401  0.082156964845  0.040360253479  0.015746840034
  0.302937440426 -0.195808301155  0.100638233510  0.050561679335  0.019836956640
  0.121165887446  0.010653867137 -0.012959556875 -0.008847407776 -0.003686319892
  0.007604226790  0.503647696334 -0.431205817816 -0.238281891882 -0.095466685259
  0.000643299038  0.534048703218 -0.582627075169 -0.363848722735 -0.150196382309
 -0.000518051436  0.095840091949  0.464979231249  0.457497149119  0.208696155583
  0.000299807723 -0.014776590982  0.818850980269  0.986587100086  0.475266965253
 -0.000143522322  0.005047573108  0.115515753980 -0.614358772213 -0.432269411676
  0.000074003338 -0.002352465170 -0.014467231540 -0.857221692236 -0.774248057673
 -0.000024680531  0.000734593960  0.003858244377 -0.057443765367  0.701232280366
  0.000011744335 -0.000345602805 -0.001793849467  0.013001072604  0.655253861911
 -0.000003007997  0.000087080272  0.000424354203 -0.002437701304  0.001842660136
  0.000001383243 -0.000040014723 -0.000194856712  0.001124527090 -0.006179952375
   23    4    6    6    6    6
  710.1597660      157.1756064      29.07492326      2.371419858    
  55602773.00      7765745.900      1589584.300      401810.9500    
  118603.3400      39300.00000      14430.35400      5793.124600    
  2497.821500      1143.717300      551.3977100      277.7501400    
  145.0303300      77.44745600      41.75015500      23.22694800    
  12.93638700      7.026064900      3.744504700      1.899190800    
 0.9146347400     0.4226736900     0.1733363600    
 -0.000008054568 -0.000004053273 -0.000001944157  0.000000682439
 -0.000027078095 -0.000013634153 -0.000006540669  0.000002295759
 -0.000079282009 -0.000039958712 -0.000019172193  0.000006730975
 -0.000218328885 -0.000110215721 -0.000052907859  0.000018569239
 -0.000590821968 -0.000298976465 -0.000143563425  0.000050427472
 -0.001617648499 -0.000821568180 -0.000394983977  0.000138601930
 -0.004449199670 -0.002271940392 -0.001092995609  0.000384311222
 -0.012329999093 -0.006350600629 -0.003063534727  0.001074988327
 -0.033633075455 -0.017577623931 -0.008500019692  0.002993846047
 -0.085361330116 -0.045767421573 -0.022289391468  0.007830818487
 -0.184635114488 -0.103019938864 -0.050575108487  0.017885933692
 -0.306177933467 -0.179922432975 -0.089736653124  0.031611756549
 -0.333940944257 -0.192210139100 -0.094508446694  0.033671837024
 -0.191849854355  0.015580024296  0.030487901892 -0.013346557196
 -0.041370213548  0.389529365165  0.292137162152 -0.110341160501
 -0.001845993934  0.478692110124  0.385624446073 -0.153311741440
 -0.000145865187  0.202678842059 -0.045196720770  0.049054159313
  0.000133805790  0.026107453083 -0.546135574829  0.272658816883
  0.000015677792  0.001459649498 -0.482015534161  0.306344394346
  0.000006078684  0.000165592035 -0.118271090545 -0.133039545385
 -0.000001395072 -0.000004040957 -0.003787423552 -0.519834214591
  0.000000043631  0.000004885302 -0.001406924453 -0.515134559115
  0.000000070089 -0.000004865843  0.000455792487 -0.025657744064
   15    2   10   10
  120.9969649      15.83839294    
  16241.49300      4278.988200      1524.597100      640.8577100    
  295.5655200      143.5265800      71.89617500      36.65707500    
  18.88423700      9.510456800      4.620822600      2.112008600    
 0.7516843600     0.2514027000     0.7547191500E-01
 -0.000085227786 -0.000041410173
 -0.000604050269 -0.000295460844
 -0.003323687046 -0.001623963386
 -0.014681175909 -0.007257132725
 -0.052573751090 -0.026160439294
 -0.148495995363 -0.075639055753
 -0.301129839898 -0.152372233245
 -0.388472922742 -0.180770410522
 -0.249912061962  0.020933522809
 -0.059007893734  0.385961404381
 -0.003152877598  0.487184768054
 -0.000572910534  0.223580259357
  0.000003395580  0.021283068455
 -0.000021618700 -0.001550311693
  0.000006353626  0.000320154202
   10    1   14
  1.180551788    
  1573.111300      295.9291500      108.3458800      47.08844000    
  21.82595400      10.48002400      4.988653200      2.304761500    
 0.9995225700     0.3810215700    
 -0.000091144520
 -0.002175116998
 -0.015333377193
 -0.061824113496
 -0.166130598283
 -0.288184302113
 -0.342936408185
 -0.296696596471
 -0.187256344500
 -0.063567214351
*
Spectral Representation Operator
Core primitive basis
Exchange
End of Spectral Representation Operator
 

/Al.ECP.Seijo.0s.0s.0e-AIMP-Lu3Al5O12-Al(oct).      
Embedding AIMP of Alo(3+) in Lu3Al5O12 
made Fri.Feb.17.01:51:48.CET.2012
   3.000    0
    0    0
*
* External AIMP: 
* Local Pot. Param. : (ECP convention)
*                      A(AIMP)=-Zeff*A(ECP)
*
M1
   12
  372971.1700      57385.37550      13169.30800      3619.437590    
  1148.006930      394.6778150      149.5069970      60.26483830    
  23.41066380      9.773332000      4.340800000      1.918320000    
 0.2198319846E-01 0.2664782852E-01 0.4917217614E-01 0.8353773086E-01
 0.1413949622     0.2359080641     0.3162084720     0.3089163191    
 0.3502243429     0.7588267585     0.8193541429     0.2211593376    
M2
    0
COREREP
   1.000
PROJOP
    1
   11    2    2    2
  117.0331550      9.784488817    
  5908.580000      885.1210000      200.7280000      56.13320000    
  17.16260000      29.59110000      2.997320000      1.069540000    
  1.307260000     0.1651860000     0.6055000000E-01
  0.005666372787  0.001486391262
  0.042199439098  0.011029180883
  0.190348424153  0.054792034259
  0.462113217071  0.144509190083
  0.382434873239  0.138563450407
  0.043209396888  0.073579476556
  0.051203495928 -0.603359381699
  0.066136232754 -0.525130211629
 -0.088828290955  0.015221725417
 -0.002555552482 -0.015732309811
  0.000987245216  0.011187890180
    8    1    6
  6.427491288    
  122.4420000      28.65160000      8.855250000      2.980410000    
  1.001540000     0.3105050000     0.1124240000     0.4102600000E-01
 -0.013939962603
 -0.091717321497
 -0.297450634404
 -0.500154262118
 -0.311129185203
 -0.012349249381
  0.004389916094
  0.000742492066
*
Spectral Representation Operator
Core primitive basis
Exchange
End of Spectral Representation Operator
 

/Al.ECP.Seijo.0s.0s.0e-AIMP-Lu3Al5O12-Al(tet).      
Embedding AIMP of Alt(3+) in Lu3Al5O12 
made Fri.Feb.17.02:06:22.CET.2012
   3.000    0
    0    0
*
* External AIMP: 
* Local Pot. Param. : (ECP convention)
*                      A(AIMP)=-Zeff*A(ECP)
*
M1
   12
  373644.1700      57242.17550      13135.20800      3611.607590    
  1144.386930      393.3688150      148.8839970      59.87703830    
  23.20256380      9.711662000      4.325120000      1.924140000    
 0.2198129195E-01 0.2673076463E-01 0.4917018688E-01 0.8371393752E-01
 0.1416402107     0.2364648432     0.3168061729     0.3098398450    
 0.3516754075     0.7611808564     0.8119485788     0.2221812378    
M2
    0
COREREP
   1.000
PROJOP
    1
   11    2    2    2
  116.9394289      9.690052306    
  5908.580000      885.1210000      200.7280000      56.13320000    
  17.16260000      29.59110000      2.997320000      1.069540000    
  1.307260000     0.1651860000     0.6055000000E-01
  0.005666388798  0.001486376403
  0.042199500209  0.011030507028
  0.190349205948  0.054786566771
  0.462111909027  0.144594686462
  0.382423998051  0.138865616438
  0.043219802854  0.073326482649
  0.051218402831 -0.604936882031
  0.066296356699 -0.540437466729
 -0.088983498219  0.030055411313
 -0.002596373040 -0.012086699637
  0.000993558657  0.010623753321
    8    1    6
  6.334014163    
  122.4420000      28.65160000      8.855250000      2.980410000    
  1.001540000     0.3105050000     0.1124240000     0.4102600000E-01
 -0.013936544168
 -0.091680550120
 -0.297397110695
 -0.499783481860
 -0.311508758775
 -0.013231234294
  0.006157116545
 -0.000332643675
*
Spectral Representation Operator
Core primitive basis
Exchange
End of Spectral Representation Operator
 
/Al.ECP.Seijo.11s8p.1s1p.0e-AIMP-Lu3Al5O12-Al(tet).      
Embedding AIMP of Alt(3+) in Lu3Al5O12  with orthogonality functions
made Fri.Feb.17.02:06:22.CET.2012
   3.000    1
   11    1
  5908.580000      885.1210000      200.7280000      56.13320000    
  17.16260000      29.59110000      2.997320000      1.069540000    
  1.307260000     0.1651860000     0.6055000000E-01
   0.001486376403
   0.011030507028
   0.054786566771
   0.144594686462
   0.138865616438
   0.073326482649
  -0.604936882031
  -0.540437466729
   0.030055411313
  -0.012086699637
   0.010623753321
    8    1
  122.4420000      28.65160000      8.855250000      2.980410000    
  1.001540000     0.3105050000     0.1124240000     0.4102600000E-01
 -0.013936544168
 -0.091680550120
 -0.297397110695
 -0.499783481860
 -0.311508758775
 -0.013231234294
  0.006157116545
 -0.000332643675
*
* External AIMP: 
* Local Pot. Param. : (ECP convention)
*                      A(AIMP)=-Zeff*A(ECP)
*
M1
   12
  373644.1700      57242.17550      13135.20800      3611.607590    
  1144.386930      393.3688150      148.8839970      59.87703830    
  23.20256380      9.711662000      4.325120000      1.924140000    
 0.2198129195E-01 0.2673076463E-01 0.4917018688E-01 0.8371393752E-01
 0.1416402107     0.2364648432     0.3168061729     0.3098398450    
 0.3516754075     0.7611808564     0.8119485788     0.2221812378    
M2
    0
COREREP
   1.000
PROJOP
    1
   11    2    2    2
  116.9394289      9.690052306    
  5908.580000      885.1210000      200.7280000      56.13320000    
  17.16260000      29.59110000      2.997320000      1.069540000    
  1.307260000     0.1651860000     0.6055000000E-01
  0.005666388798  0.001486376403
  0.042199500209  0.011030507028
  0.190349205948  0.054786566771
  0.462111909027  0.144594686462
  0.382423998051  0.138865616438
  0.043219802854  0.073326482649
  0.051218402831 -0.604936882031
  0.066296356699 -0.540437466729
 -0.088983498219  0.030055411313
 -0.002596373040 -0.012086699637
  0.000993558657  0.010623753321
    8    1    6
  6.334014163    
  122.4420000      28.65160000      8.855250000      2.980410000    
  1.001540000     0.3105050000     0.1124240000     0.4102600000E-01
 -0.013936544168
 -0.091680550120
 -0.297397110695
 -0.499783481860
 -0.311508758775
 -0.013231234294
  0.006157116545
 -0.000332643675
*
Spectral Representation Operator
Core primitive basis
Exchange
End of Spectral Representation Operator
 

/O.ECP.Seijo.0s.0s.0e-AIMP-Lu3Al5O12-O.         
Embedding AIMP of O(2-) in Lu3Al5O12 
made Fri.Feb.17.02:20:49.CET.2012
  -2.000    0
    0    0
*
* External AIMP: 
* Local Pot. Param. : (ECP convention)
*                      A(AIMP)=-Zeff*A(ECP)
*
M1
   12
  282885.8300      34740.01200      6502.573000      1486.426000    
  406.8273300      124.8370000      41.98461900      13.81633000    
  4.272136000      1.610321600     0.6078900000     0.2644720000    
 -.2177016477E-01 -.3182903023E-01 -.6529925626E-01 -.1219716589    
 -.2183449785     -.3844092285     -.5098611480     -.4604030377    
 -.7569716426     -1.308590211     -1.054027220     -.6652242305E-01
M2
    0
COREREP
   1.000
PROJOP
    1
    8    2    2    2
  40.29022393      1.946061521    
  2048.050000      309.0990000      70.41410000      19.70120000    
  6.031450000      10.22970000     0.9340900000     0.2862500000    
  0.006201928236  0.001318493603
  0.045638559282  0.009606941579
  0.200051373812  0.046725772593
  0.473799462225  0.115091368877
  0.380764668747  0.099766810867
  0.028961595518  0.068092048639
  0.024666097223 -0.465256958819
 -0.005621478303 -0.639597382977
    6    1    6
 0.4863838042    
  34.97120000      7.845090000      2.303320000     0.7219800000    
 0.2155300000     0.5900000000E-01
 -0.013146047553
 -0.085418928225
 -0.248466015979
 -0.438813009463
 -0.509339803876
  0.094679945039
*
Spectral Representation Operator
Core primitive basis
Exchange
End of Spectral Representation Operator

********************************************************************************
*         E.7.X. Y3Ga5O12 (YGG)
********************************************************************************
*           E.7.X.a. Y3Ga5O12
*             Structure:
*                    A.Nakatsuka et al., Acta Crys Sec B 51(5) (1995) 737-754
*                    (Ia-3d; a=12.273A, x=-0.0274, =0.0546, z=0.1493)
*             Embedding potentials:
*                    L.Seijo, Z.Barandiaran, to be published
*                    Out of SCEI DKH-HF calculations
*             /Y.ECP.Seijo.0s.0s.0e-AIMP-Y3Ga5O12-Y.
*             /Ga.ECP.Seijo.0s.0s.0e-AIMP-Y3Ga5O12-Ga(oct).
*             /Ga.ECP.Seijo.0s.0s.0e-AIMP-Y3Ga5O12-Ga(tet).
*             /Ga.ECP.Seijo.20s15p9d.1s1p1d.0e-AIMP-Y3Ga5O12-Ga(tet).
*             /O.ECP.Seijo.0s.0s.0e-AIMP-Y3Ga5O12-O.
********************************************************************************
/Y.ECP.Seijo.0s.0s.0e-AIMP-Y3Ga5O12-Y.          
Embedding AIMP of Y(3+) in Y3Ga5O12 
made Fri.Feb.17.18:05:06.CET.2012
   3.000    0
    0    0
*
* External AIMP: 
* Local Pot. Param. : (ECP convention)
*                      A(AIMP)=-Zeff*A(ECP)
*
M1
   13
  414990.0000      69567.00000      17539.00000      5152.500000    
  1663.900000      590.4400000      216.7900000      90.52800000    
  30.75800000      11.26020000      4.851700000      1.463900000    
 0.7359300000    
 0.9984035355E-01 0.1131104222     0.1987061656     0.3454909512    
 0.5318989113     0.5974625966     0.9265437798      1.656078641    
  1.077547050      3.302017412     0.9683385921      1.514095123    
 0.6688700025    
M2
    0
COREREP
   1.000
PROJOP
    2
   16    4    2    2    2    2
  1256.174177      177.1799294      30.26521794      4.087858143    
  22535.50000      3394.400000      769.3080000      207.1720000    
  309.4710000      35.23740000      14.99810000      27.48500000    
  4.753340000      2.129620000      3.441250000     0.6778690000    
 0.2881100000     0.3732010000     0.5311200000E-01 0.2174400000E-01
 -0.031608010904 -0.010538356112 -0.004360317625  0.001617542021
 -0.140497646906 -0.049956183978 -0.020898440641  0.007770258284
 -0.421643076098 -0.168258234018 -0.071025356787  0.026414120123
 -0.424969488275 -0.182676937648 -0.075354196546  0.027662721059
 -0.089461948188 -0.103200681004 -0.051521904544  0.019905974981
 -0.326650506559  0.924523635074  0.555012309015 -0.215110661889
 -0.109747777861  0.513274618795  0.301364376682 -0.111226260342
  0.355203898950 -0.293589092898  0.003477191161 -0.025600492833
  0.114964086206 -0.140978025936 -1.197628158495  0.587673932232
  0.050784407844 -0.081548527185 -0.542485004683  0.243294658721
 -0.133648085898  0.196015009709  0.418898717924  0.109222573176
 -0.017967617413  0.031679298749  0.077422439854 -0.991545264276
 -0.014842425782  0.027068986252  0.077658667229 -0.461821052791
  0.025078270469 -0.045411502012 -0.128413882557  0.133984425581
  0.000666916417 -0.001251191555 -0.003479302001  0.037324661524
 -0.000261081347  0.000491923065  0.001379758480 -0.011389586164
   10    3    6    6    6
  157.4565655      23.64138652      2.196889327    
  987.0300000      232.0540000      72.33480000      24.87860000    
  11.45280000      4.717860000      2.027620000      1.093910000    
 0.4690800000     0.1901090000    
  0.031481435500 -0.013533954777 -0.004672841545
  0.180018301205 -0.081318908049 -0.028275774340
  0.496962356663 -0.240583255751 -0.084714779502
  0.443199468485 -0.198491999243 -0.067808366313
  0.010898954834  0.369429636737  0.163799913150
  0.043864494880  0.606319224209  0.308276674227
 -0.033507074011  0.210896140254  0.053424118891
  0.022483787070 -0.003742790100 -0.433956964455
 -0.008153946785  0.006301928111 -0.643757998124
  0.002210656215 -0.001529012166 -0.079007051422
    7    1   10
  12.62777780    
  93.48480000      26.40650000      8.826900000      2.931690000    
  1.301810000     0.3877800000     0.1036240000    
  0.050047725053
  0.252687873041
  0.530035728424
  0.392926507182
  0.029376751544
  0.016277111768
 -0.004294427459
*
Spectral Representation Operator
Core primitive basis
Exchange
End of Spectral Representation Operator
 

/Ga.ECP.Seijo.0s.0s.0e-AIMP-Y3Ga5O12-Ga(oct).       
Embedding AIMP of Gao(3+) in Y3Ga5O12 
made Fri.Feb.17.18:15:27.CET.2012
   3.000    0
    0    0
*
* External AIMP: 
* Local Pot. Param. : (ECP convention)
*                      A(AIMP)=-Zeff*A(ECP)
*
M1
   13
  395740.0000      65160.00000      16086.00000      4671.500000    
  1538.100000      551.6500000      193.3000000      74.27300000    
  33.69300000      10.01670000      4.648500000      2.051300000    
 0.8445200000    
 0.7194329704E-01 0.8191988826E-01 0.1467702419     0.2527823898    
 0.4083302726     0.5332952967     0.6536585594      1.276590998    
  1.118820245      1.301140467      2.274688547      1.062656194    
 0.1507369371    
M2
    0
COREREP
   1.000
PROJOP
    2
   20    3    2    2    2
  755.9448288      95.96992858      12.53932855    
  70959040.00      7603324.000      1319240.000      302670.5000    
  83251.81000      25933.12000      8976.547000      3372.096000    
  1348.620000      567.5549000      248.1887000      111.6749000    
  49.24165000      23.27517000      11.08148000      4.899352000    
  2.300821000      1.026582000     0.2092229000     0.7348584000E-01
  0.000013491980 -0.000004279725 -0.000001668404
  0.000131163489 -0.000043089072 -0.000017181902
  0.000530468700 -0.000171733707 -0.000067792746
 -0.000311934842  0.000104662127  0.000042488465
  0.001402143024 -0.000441490263 -0.000170366215
  0.003678574811 -0.001145096698 -0.000435703802
  0.013499437398 -0.004243412373 -0.001623479649
  0.040090969061 -0.012868233528 -0.004924656784
  0.106443051788 -0.035723026307 -0.013776621348
  0.232114769398 -0.086622950635 -0.033768282122
  0.364365302520 -0.169076291069 -0.068071431963
  0.307543377849 -0.210081987458 -0.089003541360
  0.080427577798  0.026403197903  0.011656365923
 -0.002091497646  0.532878666518  0.332655115509
  0.003317928096  0.503059650329  0.468641422738
 -0.001366271790  0.088535497889 -0.174750132234
  0.000409993018 -0.001314851174 -0.724717681083
 -0.000327966954  0.002339486250 -0.377332707411
  0.000091487608 -0.000320837717 -0.011767256262
  0.000007645581 -0.000096529870  0.007990672836
   15    2    6    6
  84.79516116      8.759689796    
  49597.56000      8521.695000      2303.899000      783.0395000    
  305.5494000      131.1653000      60.06042000      28.47848000    
  13.71275000      6.359916000      2.903849000      1.270245000    
 0.4810799000     0.1528591000     0.4856343000E-01
  0.000016436682 -0.000006204667
  0.000246402690 -0.000093680858
  0.001889025533 -0.000716052992
  0.009964989283 -0.003823252068
  0.039612521397 -0.015359409948
  0.119508711227 -0.048148882359
  0.263338555950 -0.110434772385
  0.386818406145 -0.174968981420
  0.293029263014 -0.095726876175
  0.071898100819  0.248030570770
  0.001982633338  0.517002846263
  0.001434935022  0.352939771895
 -0.000189503182  0.049075607852
  0.000064371811 -0.008178061416
 -0.000027812362  0.000380443202
    9    1   10
  2.182971436    
  457.9123000      128.5433000      48.13583000      20.16190000    
  9.037338000      4.122069000      1.835645000     0.7793226000    
 0.2999676000    
  0.000572666319
  0.005773279127
  0.029833997464
  0.099721740771
  0.223420394393
  0.332904209095
  0.346133332358
  0.241546692553
  0.054171008078
*
Spectral Representation Operator
Core primitive basis
Exchange
End of Spectral Representation Operator
 

/Ga.ECP.Seijo.0s.0s.0e-AIMP-Y3Ga5O12-Ga(tet).       
Embedding AIMP of Gat(3+) in Y3Ga5O12 
made Fri.Feb.17.18:26:03.CET.2012
   3.000    0
    0    0
*
* External AIMP: 
* Local Pot. Param. : (ECP convention)
*                      A(AIMP)=-Zeff*A(ECP)
*
M1
   13
  394820.0000      64920.00000      16020.00000      4647.600000    
  1528.900000      548.1400000      191.9300000      73.85200000    
  33.50700000      9.948700000      4.617900000      2.033400000    
 0.8293100000    
 0.7205660929E-01 0.8210302533E-01 0.1471550743     0.2537329459    
 0.4096545727     0.5338975795     0.6560396064      1.281031438    
  1.111995554      1.315979834      2.272122103      1.050840331    
 0.1467246610    
M2
    0
COREREP
   1.000
PROJOP
    2
   20    3    2    2    2
  756.0194515      96.04499288      12.60884059    
  70959040.00      7603324.000      1319240.000      302670.5000    
  83251.81000      25933.12000      8976.547000      3372.096000    
  1348.620000      567.5549000      248.1887000      111.6749000    
  49.24165000      23.27517000      11.08148000      4.899352000    
  2.300821000      1.026582000     0.2092229000     0.7348584000E-01
  0.000013491979 -0.000004279739 -0.000001668596
  0.000131163478 -0.000043089194 -0.000017184813
  0.000530468660 -0.000171734247 -0.000067801876
 -0.000311934856  0.000104662387  0.000042490546
  0.001402142696 -0.000441493104 -0.000170390370
  0.003678574112 -0.001145099455 -0.000435837289
  0.013499432991 -0.004243449845 -0.001623667900
  0.040090962270 -0.012868248498 -0.004926279484
  0.106443007776 -0.035723397117 -0.013777649427
  0.232114725422 -0.086622851619 -0.033781423349
  0.364365027940 -0.169078692004 -0.068069459763
  0.307543543426 -0.210079227316 -0.089066331689
  0.080427654154  0.026391206522  0.011772844131
 -0.002090806699  0.532909129376  0.332466654138
  0.003316850543  0.503028228347  0.469341135228
 -0.001364812870  0.088585090560 -0.176039064214
  0.000408126428 -0.001402686433 -0.723238262721
 -0.000326438595  0.002414344225 -0.378899082448
  0.000090396590 -0.000378791622 -0.009945488957
  0.000007941100 -0.000080710081  0.007358520493
   15    2    6    6
  84.87016936      8.829374437    
  49597.56000      8521.695000      2303.899000      783.0395000    
  305.5494000      131.1653000      60.06042000      28.47848000    
  13.71275000      6.359916000      2.903849000      1.270245000    
 0.4810799000     0.1528591000     0.4856343000E-01
 -0.000016436732 -0.000006206356
 -0.000246404135 -0.000093689204
 -0.001889031798 -0.000716233303
 -0.009965044714 -0.003823634688
 -0.039612642285 -0.015363287928
 -0.119509335385 -0.048153296138
 -0.263339194848 -0.110467076420
 -0.386824080443 -0.174972327762
 -0.293028581841 -0.095810692757
 -0.071892415301  0.248282059980
 -0.001973768095  0.516885800784
 -0.001440203307  0.353102637670
  0.000194389264  0.048700955672
 -0.000064473103 -0.008157362904
  0.000026998861  0.000639989213
    9    1   10
  2.253595924    
  457.9123000      128.5433000      48.13583000      20.16190000    
  9.037338000      4.122069000      1.835645000     0.7793226000    
 0.2999676000    
  0.000572632938
  0.005771640940
  0.029831315994
  0.099693986474
  0.223416861715
  0.332754535021
  0.346119039366
  0.240646137112
  0.056349448964
*
Spectral Representation Operator
Core primitive basis
Exchange
End of Spectral Representation Operator
 

/Ga.ECP.Seijo.20s15p9d.1s1p1d.0e-AIMP-Y3Ga5O12-Ga(tet).       
Embedding AIMP of Gat(3+) in Y3Ga5O12 with orthogonality orbitals
made Fri.Feb.17.18:26:03.CET.2012
   3.000    2
   20    1
  70959040.00      7603324.000      1319240.000      302670.5000    
  83251.81000      25933.12000      8976.547000      3372.096000    
  1348.620000      567.5549000      248.1887000      111.6749000    
  49.24165000      23.27517000      11.08148000      4.899352000    
  2.300821000      1.026582000     0.2092229000     0.7348584000E-01
  -0.000001668596
  -0.000017184813
  -0.000067801876
   0.000042490546
  -0.000170390370
  -0.000435837289
  -0.001623667900
  -0.004926279484
  -0.013777649427
  -0.033781423349
  -0.068069459763
  -0.089066331689
   0.011772844131
   0.332466654138
   0.469341135228
  -0.176039064214
  -0.723238262721
  -0.378899082448
  -0.009945488957
   0.007358520493
   15    1
  49597.56000      8521.695000      2303.899000      783.0395000    
  305.5494000      131.1653000      60.06042000      28.47848000    
  13.71275000      6.359916000      2.903849000      1.270245000    
 0.4810799000     0.1528591000     0.4856343000E-01
  -0.000006206356
  -0.000093689204
  -0.000716233303
  -0.003823634688
  -0.015363287928
  -0.048153296138
  -0.110467076420
  -0.174972327762
  -0.095810692757
   0.248282059980
   0.516885800784
   0.353102637670
   0.048700955672
  -0.008157362904
   0.000639989213
    9    1
  457.9123000      128.5433000      48.13583000      20.16190000    
  9.037338000      4.122069000      1.835645000     0.7793226000    
 0.2999676000    
  0.000572632938
  0.005771640940
  0.029831315994
  0.099693986474
  0.223416861715
  0.332754535021
  0.346119039366
  0.240646137112
  0.056349448964
*
* External AIMP: 
* Local Pot. Param. : (ECP convention)
*                      A(AIMP)=-Zeff*A(ECP)
*
M1
   13
  394820.0000      64920.00000      16020.00000      4647.600000    
  1528.900000      548.1400000      191.9300000      73.85200000    
  33.50700000      9.948700000      4.617900000      2.033400000    
 0.8293100000    
 0.7205660929E-01 0.8210302533E-01 0.1471550743     0.2537329459    
 0.4096545727     0.5338975795     0.6560396064      1.281031438    
  1.111995554      1.315979834      2.272122103      1.050840331    
 0.1467246610    
M2
    0
COREREP
   1.000
PROJOP
    2
   20    3    2    2    2
  756.0194515      96.04499288      12.60884059    
  70959040.00      7603324.000      1319240.000      302670.5000    
  83251.81000      25933.12000      8976.547000      3372.096000    
  1348.620000      567.5549000      248.1887000      111.6749000    
  49.24165000      23.27517000      11.08148000      4.899352000    
  2.300821000      1.026582000     0.2092229000     0.7348584000E-01
  0.000013491979 -0.000004279739 -0.000001668596
  0.000131163478 -0.000043089194 -0.000017184813
  0.000530468660 -0.000171734247 -0.000067801876
 -0.000311934856  0.000104662387  0.000042490546
  0.001402142696 -0.000441493104 -0.000170390370
  0.003678574112 -0.001145099455 -0.000435837289
  0.013499432991 -0.004243449845 -0.001623667900
  0.040090962270 -0.012868248498 -0.004926279484
  0.106443007776 -0.035723397117 -0.013777649427
  0.232114725422 -0.086622851619 -0.033781423349
  0.364365027940 -0.169078692004 -0.068069459763
  0.307543543426 -0.210079227316 -0.089066331689
  0.080427654154  0.026391206522  0.011772844131
 -0.002090806699  0.532909129376  0.332466654138
  0.003316850543  0.503028228347  0.469341135228
 -0.001364812870  0.088585090560 -0.176039064214
  0.000408126428 -0.001402686433 -0.723238262721
 -0.000326438595  0.002414344225 -0.378899082448
  0.000090396590 -0.000378791622 -0.009945488957
  0.000007941100 -0.000080710081  0.007358520493
   15    2    6    6
  84.87016936      8.829374437    
  49597.56000      8521.695000      2303.899000      783.0395000    
  305.5494000      131.1653000      60.06042000      28.47848000    
  13.71275000      6.359916000      2.903849000      1.270245000    
 0.4810799000     0.1528591000     0.4856343000E-01
 -0.000016436732 -0.000006206356
 -0.000246404135 -0.000093689204
 -0.001889031798 -0.000716233303
 -0.009965044714 -0.003823634688
 -0.039612642285 -0.015363287928
 -0.119509335385 -0.048153296138
 -0.263339194848 -0.110467076420
 -0.386824080443 -0.174972327762
 -0.293028581841 -0.095810692757
 -0.071892415301  0.248282059980
 -0.001973768095  0.516885800784
 -0.001440203307  0.353102637670
  0.000194389264  0.048700955672
 -0.000064473103 -0.008157362904
  0.000026998861  0.000639989213
    9    1   10
  2.253595924    
  457.9123000      128.5433000      48.13583000      20.16190000    
  9.037338000      4.122069000      1.835645000     0.7793226000    
 0.2999676000    
  0.000572632938
  0.005771640940
  0.029831315994
  0.099693986474
  0.223416861715
  0.332754535021
  0.346119039366
  0.240646137112
  0.056349448964
*
Spectral Representation Operator
Core primitive basis
Exchange
End of Spectral Representation Operator
 

/O.ECP.Seijo.0s.0s.0e-AIMP-Y3Ga5O12-O.          
Embedding AIMP of O(2-) in Y3Ga5O12 
made Fri.Feb.17.18:36:26.CET.2012
  -2.000    0
    0    0
*
* External AIMP: 
* Local Pot. Param. : (ECP convention)
*                      A(AIMP)=-Zeff*A(ECP)
*
M1
   12
  251175.8300      28086.01200      5087.473000      1182.626000    
  334.8373300      106.2370000      36.41761900      11.65033000    
  3.609136000      1.355821600     0.5281900000     0.7471200000E-01
 -.2362948458E-01 -.3664974354E-01 -.7429759563E-01 -.1339039113    
 -.2370914116     -.4035140114     -.5099026576     -.4692346673    
 -.8868587635     -1.317400267     -.9013720036     -.6145482836E-02
M2
    0
COREREP
   1.000
PROJOP
    1
    8    2    2    2
  40.35121025      1.993490644    
  2048.050000      309.0990000      70.41410000      19.70120000    
  6.031450000      10.22970000     0.9340900000     0.2862500000    
  0.006202020921  0.001318439581
  0.045639048600  0.009598725386
  0.200055351353  0.046752135681
  0.473798959425  0.114654831525
  0.380727025688  0.098328801134
  0.028999506237  0.069402004627
  0.024663926717 -0.463763001189
 -0.005649115616 -0.640745756898
    6    1    6
 0.5366448735    
  34.97120000      7.845090000      2.303320000     0.7219800000    
 0.2155300000     0.5900000000E-01
 -0.013144460965
 -0.085224776316
 -0.248908950964
 -0.435590092383
 -0.511780758213
  0.092125668336
*
Spectral Representation Operator
Core primitive basis
Exchange
End of Spectral Representation Operator
 

********************************************************************************
*         E.7.X. Nd3Ga5O12 (NdGG)
********************************************************************************
*           E.7.X.a. Nd3Ga5O12
*             Structure:
*                    H.Sawada, J. Solid State Chem 132 (1997) 300-307
*                    (Ia-3d; a=12.3829A, x=-0.0289, =0.0542, z=0.1494)
*             Embedding potentials:
*                    L.Seijo, Z.Barandiaran, to be published
*                    Out of SCEI DKH-HF calculations
*             /Nd.ECP.Seijo.0s.0s.0e-AIMP-Nd3Ga5O12-Nd.
*             /Ga.ECP.Seijo.0s.0s.0e-AIMP-Nd3Ga5O12-Ga(oct).
*             /Ga.ECP.Seijo.0s.0s.0e-AIMP-Nd3Ga5O12-Ga(tet).
*             /Ga.ECP.Seijo.20s15p9d.1s1p1d.0e-AIMP-Nd3Ga5O12-Ga(tet).
*             /O.ECP.Seijo.0s.0s.0e-AIMP-Nd3Ga5O12-O.
********************************************************************************
/Nd.ECP.Seijo.0s.0s.0e-AIMP-Nd3Ga5O12-Nd.       
Embedding AIMP of Nd(3+) in Nd3Ga5O12 
made Mon.Feb.20.20:00:38.CET.2012
   3.000    0
    0    0
*
* External AIMP: 
* Local Pot. Param. : (ECP convention)
*                      A(AIMP)=-Zeff*A(ECP)
*
M1
   15
  533060.0000      104567.0000      30070.00000      9812.800000    
  3494.100000      1282.830000      480.0800000      213.9500000    
  73.82200000      36.25100000      7.500900000      5.277200000    
  2.279880000     0.9661500000     0.4848200000    
 0.1627760997     0.1580210565     0.2643540095     0.4217710895    
 0.5965792704     0.7403028898      1.286481211      1.698598629    
  1.375735015      3.970246998      2.164489213      2.774812914    
  1.060731141      1.955038679     0.3700617893    
M2
    0
COREREP
   1.000
PROJOP
    3
   27    5    2    2    2    2    2
  3214.955841      528.9581820      118.7891453      25.54797687    
  3.725416710    
 0.2909546400E+11  3547424800.      626604150.0      132478650.0    
  32558625.00      9188110.900      2931551.800      1000868.800    
  353897.7400      130371.1400      49842.27100      19521.55500    
  7851.005800      3273.063700      1410.205000      626.6612000    
  287.5312100      122.7601900      56.63517700      22.56243100    
  11.58406900      4.427495600      2.215405700     0.6228490400    
 0.2881451800     0.5016252400E-01 0.2135007700E-01
  0.000001319003  0.000000489200  0.000000210400 -0.000000109824  0.000000040011
 -0.000005784773 -0.000002144625 -0.000000923015  0.000000481327 -0.000000175539
  0.000019913909  0.000007365803  0.000003182549 -0.000001650422  0.000000604964
 -0.000082180312 -0.000030063230 -0.000013233496  0.000006682071 -0.000002504693
 -0.000369100551 -0.000129701705 -0.000061026822  0.000027948753 -0.000011314213
 -0.000512852383 -0.000188129945 -0.000082669490  0.000041866896 -0.000015749977
 -0.001299845498 -0.000454294333 -0.000216616274  0.000097246661 -0.000039621139
 -0.002529118015 -0.000927743466 -0.000410797993  0.000206170953 -0.000079549009
 -0.005297084592 -0.001874916166 -0.000886823491  0.000402920216 -0.000156565383
 -0.010718459642 -0.003927829006 -0.001781294370  0.000869825166 -0.000370400945
 -0.022116519357 -0.008088349613 -0.003751288152  0.001772114912 -0.000711862409
 -0.046563139250 -0.017554878865 -0.008093212765  0.003876167256 -0.001594563613
 -0.097033209067 -0.037734045190 -0.017606896854  0.008397291713 -0.003431675440
 -0.189679804203 -0.080153983433 -0.037610334305  0.018053747943 -0.007398456972
 -0.312805158385 -0.150276376658 -0.072778359313  0.034981648848 -0.014353943777
 -0.335404678916 -0.211937066093 -0.105910665983  0.051751806927 -0.021264773765
 -0.154901179141 -0.053543439262 -0.027114969277  0.012552580680 -0.005207757911
 -0.013675428969  0.480952529120  0.381446372764 -0.203802108537  0.085822621285
  0.000822635999  0.580805273270  0.617382956595 -0.367649314023  0.158044221612
 -0.000250324881  0.108778468171 -0.387833374544  0.345568568885 -0.161577780824
  0.000182366722 -0.018355603838 -0.863248339209  1.028212095276 -0.526177957746
 -0.000081136465  0.006513406421 -0.126297062962 -0.553845002067  0.424130834700
  0.000036153129 -0.003269037839  0.019353697656 -0.889995706866  0.849165682156
 -0.000012188704  0.001057801474 -0.004982780346 -0.054622481189 -0.852651698900
  0.000006453450 -0.000520091431  0.002429652324  0.012367681720 -0.554568117534
 -0.000001662390  0.000135486928 -0.000597401998 -0.002022931405  0.033136171985
  0.000000771945 -0.000065267351  0.000285790575  0.000949754097 -0.010091765657
   23    4    6    6    6    6
  473.2867841      100.7392077      19.38333684      1.948199200    
  48217378.00      7261355.300      1507340.100      382356.3000    
  113813.7700      38195.06100      14131.43800      5704.224200    
  2478.188900      1142.285500      552.5598500      278.4579500    
  145.2685100      77.53668500      41.63418500      22.36848000    
  12.18950400      6.537772600      3.394021900      1.729504100    
 0.7537937000     0.3388782900     0.1396077200    
  0.000001216696  0.000000607190 -0.000000301555 -0.000000039836
 -0.000014240022 -0.000006980540  0.000003332801 -0.000000530563
 -0.000037751253 -0.000018086839  0.000008186947 -0.000004849790
 -0.000107403437 -0.000052717199  0.000025132457 -0.000003814384
 -0.000293532624 -0.000142375444  0.000066399841 -0.000029948047
 -0.000811793811 -0.000396263928  0.000185989030 -0.000067460877
 -0.002290416712 -0.001121162619  0.000526109839 -0.000203807318
 -0.006513863741 -0.003208762523  0.001507238546 -0.000570017822
 -0.018354908412 -0.009134078392  0.004303224294 -0.001654675704
 -0.049266007943 -0.024972171720  0.011800315334 -0.004473442959
 -0.117955426283 -0.061715655497  0.029401957720 -0.011345978561
 -0.229905370434 -0.125893352137  0.060506737613 -0.022934496108
 -0.329834741033 -0.190243021909  0.092930063132 -0.036387930511
 -0.294305684885 -0.144461456161  0.065832186369 -0.023448189364
 -0.126596608979  0.132097331131 -0.097901286619  0.037416319978
 -0.016848620393  0.477866956132 -0.352489179774  0.154502951956
 -0.000891450560  0.414535087954 -0.309245767001  0.114695487281
  0.000302004686  0.112711201001  0.270433500199 -0.138007178869
 -0.000033207631  0.006931215400  0.642435356279 -0.428279736277
  0.000070675124  0.000678514571  0.308671412160 -0.101941092728
 -0.000022863590 -0.000123907868  0.026005184706  0.528218463042
  0.000009354565  0.000048536548 -0.000198742414  0.631598495590
 -0.000002376314 -0.000022198287 -0.000393711510  0.008388512648
   15    2   10   10
  75.29745845      10.27675397    
  12677.91900      3346.862800      1219.561800      523.0680700    
  247.3147200      124.1353600      64.96501300      34.76094300    
  18.90510400      10.33393100      5.570941700      2.951990500    
  1.532838000     0.7557562000     0.3059887100    
 -0.000051672405 -0.000024069111
 -0.000382904040 -0.000178922704
 -0.002113593538 -0.000989032774
 -0.009384501509 -0.004420752705
 -0.033341802120 -0.015812521994
 -0.094193487637 -0.045416593549
 -0.204085013848 -0.099374738770
 -0.320740009779 -0.152674560685
 -0.332563072788 -0.133422057363
 -0.183868368366  0.071638340463
 -0.042841311446  0.355727184856
 -0.002576168720  0.437450713103
 -0.000212936629  0.237764872841
  0.000041845480  0.050630130948
 -0.000013772123 -0.001706478868
   10    1    3
 -.4313323419    
  379.5970900      131.0924400      56.14306400      26.35066300    
  12.76964700      6.246679200      2.970975300      1.349167200    
 0.5668657200     0.2081914900    
  0.000338642926
  0.003006821772
  0.015186755210
  0.050579300098
  0.130020771599
  0.241620789169
  0.323091957489
  0.325666727947
  0.241044358634
  0.141584909530
*
Spectral Representation Operator
Core primitive basis
Exchange
End of Spectral Representation Operator
 

/Ga.ECP.Seijo.0s.0s.0e-AIMP-Nd3Ga5O12-Ga(oct).      
Embedding AIMP of Gao(3+) in Nd3Ga5O12 
made Mon.Feb.20.20:11:01.CET.2012
   3.000    0
    0    0
*
* External AIMP: 
* Local Pot. Param. : (ECP convention)
*                      A(AIMP)=-Zeff*A(ECP)
*
M1
   13
  400930.0000      66683.00000      16604.00000      4846.700000    
  1598.500000      574.4300000      202.5700000      77.18200000    
  34.94400000      10.44040000      4.807400000      2.120500000    
 0.8752700000    
 0.7131448792E-01 0.8045581858E-01 0.1435766960     0.2471589850    
 0.4006720747     0.5287982789     0.6376585125      1.245626077    
  1.164322431      1.223497809      2.302616791      1.122018197    
 0.1656171746    
M2
    0
COREREP
   1.000
PROJOP
    2
   20    3    2    2    2
  755.8789743      95.90417291      12.47537682    
  70959040.00      7603324.000      1319240.000      302670.5000    
  83251.81000      25933.12000      8976.547000      3372.096000    
  1348.620000      567.5549000      248.1887000      111.6749000    
  49.24165000      23.27517000      11.08148000      4.899352000    
  2.300821000      1.026582000     0.2092229000     0.7348584000E-01
  0.000013491980 -0.000004279719 -0.000001668532
  0.000131163491 -0.000043088995 -0.000017183704
  0.000530468708 -0.000171733446 -0.000067799063
 -0.000311934835  0.000104662085  0.000042494618
  0.001402143074 -0.000441489519 -0.000170368905
  0.003678575074 -0.001145092647 -0.000435721108
  0.013499437944 -0.004243406257 -0.001623430737
  0.040090972131 -0.012868184806 -0.004924944241
  0.106443056103 -0.035722991177 -0.013775931167
  0.232114794332 -0.086622565276 -0.033771091340
  0.364365329446 -0.169076333942 -0.068064855827
  0.307543424599 -0.210080249317 -0.089022500890
  0.080427356698  0.026400731537  0.011705853939
 -0.002091267432  0.532881489522  0.332536025480
  0.003317607058  0.503044925839  0.468860516602
 -0.001365780321  0.088561982819 -0.175140947651
  0.000409420405 -0.001340085544 -0.723922542337
 -0.000327515768  0.002363049353 -0.378407760586
  0.000091013003 -0.000347742481 -0.010630175238
  0.000007817477 -0.000086748309  0.007603903186
   15    2    6    6
  84.72941651      8.696915906    
  49597.56000      8521.695000      2303.899000      783.0395000    
  305.5494000      131.1653000      60.06042000      28.47848000    
  13.71275000      6.359916000      2.903849000      1.270245000    
 0.4810799000     0.1528591000     0.4856343000E-01
 -0.000016436628 -0.000006204450
 -0.000246401902 -0.000093676645
 -0.001889019294 -0.000716027092
 -0.009964957200 -0.003823080836
 -0.039612389257 -0.015358839421
 -0.119508328055 -0.048146603768
 -0.263337626361 -0.110430494929
 -0.386816309952 -0.174958468121
 -0.293028754535 -0.095727819119
 -0.071902702901  0.247992472122
 -0.001984947767  0.516936200658
 -0.001435057095  0.353128040925
  0.000188653872  0.049178558698
 -0.000059519423 -0.008926480275
  0.000025633148  0.000725499582
    9    1   10
  2.120417816    
  457.9123000      128.5433000      48.13583000      20.16190000    
  9.037338000      4.122069000      1.835645000     0.7793226000    
 0.2999676000    
  0.000572553729
  0.005775405930
  0.029830409627
  0.099758718853
  0.223365947298
  0.333143720744
  0.345822909984
  0.242852208903
  0.051909625889
*
Spectral Representation Operator
Core primitive basis
Exchange
End of Spectral Representation Operator
 

/Ga.ECP.Seijo.0s.0s.0e-AIMP-Nd3Ga5O12-Ga(tet).      
Embedding AIMP of Gat(3+) in Nd3Ga5O12 
made Mon.Feb.20.20:21:59.CET.2012
   3.000    0
    0    0
*
* External AIMP: 
* Local Pot. Param. : (ECP convention)
*                      A(AIMP)=-Zeff*A(ECP)
*
M1
   13
  401260.0000      66684.00000      16590.00000      4842.200000    
  1596.900000      573.7400000      202.2200000      77.04400000    
  34.87700000      10.40190000      4.787500000      2.105800000    
 0.8590600000    
 0.7128912828E-01 0.8051765960E-01 0.1436783274     0.2472775729    
 0.4009079021     0.5290239337     0.6384758548      1.247571936    
  1.162220286      1.232227904      2.304177620      1.114422983    
 0.1615422258    
M2
    0
COREREP
   1.000
PROJOP
    2
   20    3    2    2    2
  756.1153920      96.14118751      12.70561158    
  70959040.00      7603324.000      1319240.000      302670.5000    
  83251.81000      25933.12000      8976.547000      3372.096000    
  1348.620000      567.5549000      248.1887000      111.6749000    
  49.24165000      23.27517000      11.08148000      4.899352000    
  2.300821000      1.026582000     0.2092229000     0.7348584000E-01
  0.000013491979 -0.000004279736 -0.000001668812
  0.000131163478 -0.000043089136 -0.000017187921
  0.000530468660 -0.000171734088 -0.000067812468
 -0.000311934850  0.000104662427  0.000042498970
  0.001402142676 -0.000441492868 -0.000170402558
  0.003678574250 -0.001145095288 -0.000435893508
  0.013499432587 -0.004243450775 -0.001623692927
  0.040090964174 -0.012868194620 -0.004927038889
  0.106443002309 -0.035723435790 -0.013777448591
  0.232114743557 -0.086622378194 -0.033787946612
  0.364364997222 -0.169079259322 -0.068063628688
  0.307543632831 -0.210076596431 -0.089101738065
  0.080427418051  0.026385729975  0.011850197801
 -0.002090380557  0.532918978220  0.332308512425
  0.003316237756  0.503003906305  0.469732110849
 -0.001363920953  0.088627819847 -0.176716765736
  0.000407059283 -0.001451201456 -0.722143821888
 -0.000325602141  0.002457024277 -0.380362754753
  0.000089609548 -0.000422412202 -0.008358060186
  0.000008165445 -0.000068440220  0.006969250935
   15    2    6    6
  84.96638649      8.927949987    
  49597.56000      8521.695000      2303.899000      783.0395000    
  305.5494000      131.1653000      60.06042000      28.47848000    
  13.71275000      6.359916000      2.903849000      1.270245000    
 0.4810799000     0.1528591000     0.4856343000E-01
 -0.000016436672 -0.000006206571
 -0.000246403405 -0.000093686513
 -0.001889025022 -0.000716252884
 -0.009965014144 -0.003823537283
 -0.039612495163 -0.015363691259
 -0.119508956687 -0.048151801160
 -0.263338120145 -0.110470967532
 -0.386822654212 -0.174960504405
 -0.293027779212 -0.095835435370
 -0.071897229056  0.248301765556
 -0.001974535148  0.516783804896
 -0.001441575398  0.353363107320
  0.000194466598  0.048702288297
 -0.000059192805 -0.008934570679
  0.000024950417  0.000933381248
    9    1   10
  2.352493349    
  457.9123000      128.5433000      48.13583000      20.16190000    
  9.037338000      4.122069000      1.835645000     0.7793226000    
 0.2999676000    
  0.000572560726
  0.005773587737
  0.029829401268
  0.099727837696
  0.223380238937
  0.332965709071
  0.345872458283
  0.241723052471
  0.054410815992
*
Spectral Representation Operator
Core primitive basis
Exchange
End of Spectral Representation Operator
 

/Ga.ECP.Seijo.20s15p9d.1s1p1d.0e-AIMP-Nd3Ga5O12-Ga(tet).      
Embedding AIMP of Gat(3+) in Nd3Ga5O12 with orthogonality functions
made Mon.Feb.20.20:21:59.CET.2012
   3.000    2
   20    1
  70959040.00      7603324.000      1319240.000      302670.5000    
  83251.81000      25933.12000      8976.547000      3372.096000    
  1348.620000      567.5549000      248.1887000      111.6749000    
  49.24165000      23.27517000      11.08148000      4.899352000    
  2.300821000      1.026582000     0.2092229000     0.7348584000E-01
  -0.000001668812
  -0.000017187921
  -0.000067812468
   0.000042498970
  -0.000170402558
  -0.000435893508
  -0.001623692927
  -0.004927038889
  -0.013777448591
  -0.033787946612
  -0.068063628688
  -0.089101738065
   0.011850197801
   0.332308512425
   0.469732110849
  -0.176716765736
  -0.722143821888
  -0.380362754753
  -0.008358060186
   0.006969250935
   15   1
  49597.56000      8521.695000      2303.899000      783.0395000    
  305.5494000      131.1653000      60.06042000      28.47848000    
  13.71275000      6.359916000      2.903849000      1.270245000    
 0.4810799000     0.1528591000     0.4856343000E-01
  -0.000006206571
  -0.000093686513
  -0.000716252884
  -0.003823537283
  -0.015363691259
  -0.048151801160
  -0.110470967532
  -0.174960504405
  -0.095835435370
   0.248301765556
   0.516783804896
   0.353363107320
   0.048702288297
  -0.008934570679
   0.000933381248
    9    1 
  457.9123000      128.5433000      48.13583000      20.16190000    
  9.037338000      4.122069000      1.835645000     0.7793226000    
 0.2999676000    
  0.000572560726
  0.005773587737
  0.029829401268
  0.099727837696
  0.223380238937
  0.332965709071
  0.345872458283
  0.241723052471
  0.054410815992
*
* External AIMP: 
* Local Pot. Param. : (ECP convention)
*                      A(AIMP)=-Zeff*A(ECP)
*
M1
   13
  401260.0000      66684.00000      16590.00000      4842.200000    
  1596.900000      573.7400000      202.2200000      77.04400000    
  34.87700000      10.40190000      4.787500000      2.105800000    
 0.8590600000    
 0.7128912828E-01 0.8051765960E-01 0.1436783274     0.2472775729    
 0.4009079021     0.5290239337     0.6384758548      1.247571936    
  1.162220286      1.232227904      2.304177620      1.114422983    
 0.1615422258    
M2
    0
COREREP
   1.000
PROJOP
    2
   20    3    2    2    2
  756.1153920      96.14118751      12.70561158    
  70959040.00      7603324.000      1319240.000      302670.5000    
  83251.81000      25933.12000      8976.547000      3372.096000    
  1348.620000      567.5549000      248.1887000      111.6749000    
  49.24165000      23.27517000      11.08148000      4.899352000    
  2.300821000      1.026582000     0.2092229000     0.7348584000E-01
  0.000013491979 -0.000004279736 -0.000001668812
  0.000131163478 -0.000043089136 -0.000017187921
  0.000530468660 -0.000171734088 -0.000067812468
 -0.000311934850  0.000104662427  0.000042498970
  0.001402142676 -0.000441492868 -0.000170402558
  0.003678574250 -0.001145095288 -0.000435893508
  0.013499432587 -0.004243450775 -0.001623692927
  0.040090964174 -0.012868194620 -0.004927038889
  0.106443002309 -0.035723435790 -0.013777448591
  0.232114743557 -0.086622378194 -0.033787946612
  0.364364997222 -0.169079259322 -0.068063628688
  0.307543632831 -0.210076596431 -0.089101738065
  0.080427418051  0.026385729975  0.011850197801
 -0.002090380557  0.532918978220  0.332308512425
  0.003316237756  0.503003906305  0.469732110849
 -0.001363920953  0.088627819847 -0.176716765736
  0.000407059283 -0.001451201456 -0.722143821888
 -0.000325602141  0.002457024277 -0.380362754753
  0.000089609548 -0.000422412202 -0.008358060186
  0.000008165445 -0.000068440220  0.006969250935
   15    2    6    6
  84.96638649      8.927949987    
  49597.56000      8521.695000      2303.899000      783.0395000    
  305.5494000      131.1653000      60.06042000      28.47848000    
  13.71275000      6.359916000      2.903849000      1.270245000    
 0.4810799000     0.1528591000     0.4856343000E-01
 -0.000016436672 -0.000006206571
 -0.000246403405 -0.000093686513
 -0.001889025022 -0.000716252884
 -0.009965014144 -0.003823537283
 -0.039612495163 -0.015363691259
 -0.119508956687 -0.048151801160
 -0.263338120145 -0.110470967532
 -0.386822654212 -0.174960504405
 -0.293027779212 -0.095835435370
 -0.071897229056  0.248301765556
 -0.001974535148  0.516783804896
 -0.001441575398  0.353363107320
  0.000194466598  0.048702288297
 -0.000059192805 -0.008934570679
  0.000024950417  0.000933381248
    9    1   10
  2.352493349    
  457.9123000      128.5433000      48.13583000      20.16190000    
  9.037338000      4.122069000      1.835645000     0.7793226000    
 0.2999676000    
  0.000572560726
  0.005773587737
  0.029829401268
  0.099727837696
  0.223380238937
  0.332965709071
  0.345872458283
  0.241723052471
  0.054410815992
*
Spectral Representation Operator
Core primitive basis
Exchange
End of Spectral Representation Operator
 

/O.ECP.Seijo.0s.0s.0e-AIMP-Nd3Ga5O12-O.         
Embedding AIMP of O(2-) in Nd3Ga5O12 
made Mon.Feb.20.20:32:15.CET.2012
  -2.000    0
    0    0
*
* External AIMP: 
* Local Pot. Param. : (ECP convention)
*                      A(AIMP)=-Zeff*A(ECP)
*
M1
   12
  282885.8300      34740.01200      6502.573000      1486.426000    
  406.8273300      124.8370000      41.98461900      13.81633000    
  4.272136000      1.610321600     0.6078900000     0.2644720000    
 -.2171734204E-01 -.3181912849E-01 -.6526941843E-01 -.1216634721    
 -.2184638219     -.3833548478     -.5103601842     -.4570724880    
 -.7597446907     -1.288890520     -1.068589412     -.7305467422E-01
M2
    0
COREREP
   1.000
PROJOP
    1
    8    2    2    2
  40.43241224      2.063656764    
  2048.050000      309.0990000      70.41410000      19.70120000    
  6.031450000      10.22970000     0.9340900000     0.2862500000    
  0.006202144474  0.001318261060
  0.045639878668  0.009590427532
  0.200060174921  0.046771073105
  0.473807404518  0.114249923254
  0.380701266557  0.096988508188
  0.029025743458  0.070583354286
  0.024609878467 -0.462140606495
 -0.005612811260 -0.642020315126
    6    1    6
 0.6073152851    
  34.97120000      7.845090000      2.303320000     0.7219800000    
 0.2155300000     0.5900000000E-01
 -0.013143849379
 -0.084876894372
 -0.249613402979
 -0.430441724744
 -0.517260493518
  0.091973916247
*
Spectral Representation Operator
Core primitive basis
Exchange
End of Spectral Representation Operator
 
 
********************************************************************************
*         E.7.X. Sm3Ga5O12 (SmGG)
********************************************************************************
*           E.7.X.a. Sm3Ga5O12
*             Structure:
*                    H.Sawada, J. Solid State Chem 132 (1997) 300-307
*                    (Ia-3d; a=12.4361A, x=-0.0292, =0.0530, z=0.1490)
*             Embedding potentials:
*                    L.Seijo, Z.Barandiaran, to be published
*                    Out of SCEI DKH-HF calculations
*             /Sm.ECP.Seijo.0s.0s.0e-AIMP-Sm3Ga5O12-Sm.
*             /Ga.ECP.Seijo.0s.0s.0e-AIMP-Sm3Ga5O12-Ga(oct).
*             /Ga.ECP.Seijo.0s.0s.0e-AIMP-Sm3Ga5O12-Ga(tet).
*             /Ga.ECP.Seijo.20s15p9d.1s1p1d.0e-AIMP-Sm3Ga5O12-Ga(tet).
*             /O.ECP.Seijo.0s.0s.0e-AIMP-Sm3Ga5O12-O.
********************************************************************************
/Sm.ECP.Seijo.0s.0s.0e-AIMP-Sm3Ga5O12-Sm.       
Embedding AIMP of Sm(3+) in Sm3Ga5O12 
made Mon.Feb.20.19:58:04.CET.2012
   3.000    0
    0    0
*
* External AIMP: 
* Local Pot. Param. : (ECP convention)
*                      A(AIMP)=-Zeff*A(ECP)
*
M1
   15
  512450.0000      103071.0000      30099.00000      9929.000000    
  3574.100000      1326.200000      505.2200000      228.0000000    
  79.07900000      39.42400000      8.022900000      5.222000000    
  2.188280000      1.008760000     0.5107800000    
 0.1737688608     0.1652437118     0.2753938344     0.4348750403    
 0.6044101879     0.7506931015      1.312026400      1.685904885    
  1.417268054      3.983870959      2.938736874      2.490270704    
  1.188673352      1.893736018     0.3517946742    
M2
    0
COREREP
   1.000
PROJOP
    3
   27    5    2    2    2    2    2
  3455.597418      573.9497030      129.8908693      27.80754264    
  3.912288395    
 0.4199856300E+11  4594105500.      753039310.0      157767800.0    
  39364524.00      11131390.00      3423497.400      1127469.900    
  393826.7200      145651.2200      56081.15100      22223.64100    
  9070.966600      3800.649500      1630.105700      719.0328200    
  327.6299200      135.7440500      62.19013000      24.51468900    
  12.66204700      4.859317300      2.422075600     0.6773245000    
 0.3093579700     0.5277936800E-01 0.2224604100E-01
  0.000000763261 -0.000000292854 -0.000000122223  0.000000066904 -0.000000020487
 -0.000003487580  0.000001337520  0.000000558634 -0.000000305497  0.000000093759
  0.000012578125 -0.000004810194 -0.000002018159  0.000001097121 -0.000000340848
 -0.000048458462  0.000018275821  0.000007838884 -0.000004138630  0.000001359267
 -0.000393480092  0.000139314980  0.000065894247 -0.000030464416  0.000012555432
 -0.000506352797  0.000187642549  0.000082936244 -0.000042086151  0.000014913956
 -0.001352383595  0.000476354260  0.000228055060 -0.000103694084  0.000043529610
 -0.002670882080  0.000988573066  0.000440943433 -0.000221410736  0.000081374511
 -0.005451968496  0.001941793367  0.000924890994 -0.000423444644  0.000169199926
 -0.010843958230  0.004013079409  0.001829114286 -0.000898671554  0.000373567719
 -0.021977898318  0.008093142674  0.003778729376 -0.001795000989  0.000718854463
 -0.044922234454  0.017081540081  0.007919029991 -0.003816814066  0.001554343647
 -0.091725230904  0.035815086799  0.016811726547 -0.008064142755  0.003268818170
 -0.180056581983  0.076243069244  0.035951005670 -0.017360017645  0.007051874483
 -0.304062937067  0.144564853118  0.070271779568 -0.033963563916  0.013815961966
 -0.341688335251  0.212264576240  0.106293113435 -0.052205587073  0.021264830634
 -0.172760526937  0.071446868893  0.036907900800 -0.017519853628  0.007190726095
 -0.017949701075 -0.468904215018 -0.373099544420  0.200626863191 -0.083770516425
  0.001838146517 -0.593722772046 -0.630296527834  0.377841227834 -0.161063482995
 -0.000813234035 -0.113680855000  0.384686850876 -0.352081079188  0.163795576702
  0.000544047273  0.020376371035  0.864869876875 -1.032714273984  0.524098484188
 -0.000253366667 -0.007169727732  0.126302774152  0.567319952310 -0.432082853360
  0.000123786088  0.003533595163 -0.018897544758  0.883209853314 -0.830217473832
 -0.000041483253 -0.001125377912  0.004814123818  0.053475712740  0.845473000629
  0.000020928911  0.000547265038 -0.002315165409 -0.012021902007  0.551094051023
 -0.000005438391 -0.000142268473  0.000567965300  0.002065386594 -0.023649466705
  0.000002589816  0.000068628753 -0.000272102670 -0.000977719647  0.005617144608
   23    4    6    6    6    6
  512.6314367      110.1913388      21.07980678      2.005756071    
  51833132.00      7387198.900      1527739.900      389079.1200    
  115150.0500      38447.97900      14216.70900      5732.236300    
  2484.365500      1142.648700      552.7357400      278.6377800    
  145.2481200      77.64623500      41.97587600      22.71782700    
  12.41312400      6.677169200      3.490204300      1.788677600    
 0.8091375900     0.3660366800     0.1513457100    
 -0.000000881239  0.000000422442 -0.000000245048  0.000000021302
  0.000016625991 -0.000008091487  0.000004008065 -0.000001091705
  0.000042850283 -0.000021084464  0.000009232904 -0.000004135504
  0.000122694767 -0.000059813396  0.000029606168 -0.000007652191
  0.000335610991 -0.000164823365  0.000076737761 -0.000031655764
  0.000926233354 -0.000455521844  0.000215829514 -0.000078980740
  0.002596044764 -0.001282025156  0.000605531272 -0.000229780592
  0.007362527743 -0.003660627409  0.001732661925 -0.000647966976
  0.020672704939 -0.010387515016  0.004929643995 -0.001864885738
  0.054983372586 -0.028192420675  0.013429859460 -0.005029974813
  0.129045829509 -0.068366531035  0.032837040940 -0.012469595853
  0.245301814761 -0.136352372490  0.066145143207 -0.024788222642
  0.336437134551 -0.195867551040  0.096421508424 -0.037114713676
  0.276622788172 -0.123873435736  0.054242352153 -0.018735775998
  0.107072323635  0.176339474627 -0.127669712453  0.049265403768
  0.012477129617  0.498251029610 -0.378755646478  0.163126847519
  0.000621534973  0.378837792867 -0.262164254201  0.092095158124
 -0.000266831265  0.089296003040  0.340216449113 -0.174554239898
  0.000018963057  0.005071410045  0.627149494267 -0.414504383673
 -0.000054786624  0.000512792053  0.264338503497 -0.060356645100
  0.000018246194 -0.000069730330  0.020604898866  0.518881916644
 -0.000007014644  0.000025789633  0.000567735215  0.614247383229
  0.000001749341 -0.000013118504 -0.000392479347  0.028771355082
   15    2   10   10
  83.01790073      11.28096736    
  12216.87000      3315.636100      1219.376000      522.9473500    
  247.2513900      124.1513000      64.98098000      34.75601200    
  18.92465200      10.32849300      5.567167600      2.953776700    
  1.521279200     0.7454849200     0.3671292000    
 -0.000064567643  0.000030413406
 -0.000455925478  0.000215755880
 -0.002497013598  0.001181950966
 -0.011004826728  0.005253481239
 -0.038466512513  0.018476511352
 -0.106396573932  0.052098502449
 -0.223043325302  0.109776183448
 -0.334653663289  0.160415745640
 -0.319605613170  0.116377766839
 -0.156508080326 -0.121009829507
 -0.030532540789 -0.388245960099
 -0.001734238750 -0.417706076508
 -0.000149385475 -0.199661715658
 -0.000010804054 -0.034235305275
 -0.000010136279 -0.001634517488
   10    1    4
 -.1783736225    
  377.7328800      130.1215400      56.17466400      26.35374500    
  12.80968900      6.271368500      2.977001200      1.350487600    
 0.5680585800     0.2106025000    
 -0.000467664747
 -0.004036766756
 -0.019577467957
 -0.063627020170
 -0.155672059137
 -0.269758534110
 -0.336535276582
 -0.309029740917
 -0.206832144329
 -0.090162870295
*
Spectral Representation Operator
Core primitive basis
Exchange
End of Spectral Representation Operator
 

/Ga.ECP.Seijo.0s.0s.0e-AIMP-Sm3Ga5O12-Ga(oct).      
Embedding AIMP of Gao(3+) in Sm3Ga5O12 
made Mon.Feb.20.20:09:16.CET.2012
   3.000    0
    0    0
*
* External AIMP: 
* Local Pot. Param. : (ECP convention)
*                      A(AIMP)=-Zeff*A(ECP)
*
M1
   13
  401130.0000      66791.00000      16631.00000      4855.600000    
  1601.900000      575.6900000      203.0500000      77.32400000    
  35.00200000      10.45620000      4.808900000      2.116700000    
 0.8644300000    
 0.7127213540E-01 0.8036425502E-01 0.1434582259     0.2468290734    
 0.4002091374     0.5286058015     0.6369699788      1.244215270    
  1.166409865      1.221919136      2.306220447      1.123250113    
 0.1636098946    
M2
    0
COREREP
   1.000
PROJOP
    2
   20    3    2    2    2
  755.8821803      95.90722079      12.47750932    
  70959040.00      7603324.000      1319240.000      302670.5000    
  83251.81000      25933.12000      8976.547000      3372.096000    
  1348.620000      567.5549000      248.1887000      111.6749000    
  49.24165000      23.27517000      11.08148000      4.899352000    
  2.300821000      1.026582000     0.2092229000     0.7348584000E-01
  0.000013491980 -0.000004279724 -0.000001668321
  0.000131163490 -0.000043089071 -0.000017180674
  0.000530468705 -0.000171733685 -0.000067788629
 -0.000311934840  0.000104662148  0.000042485268
  0.001402143083 -0.000441489723 -0.000170361509
  0.003678574905 -0.001145096577 -0.000435680221
  0.013499438221 -0.004243403971 -0.001623471604
  0.040090969854 -0.012868237006 -0.004924338616
  0.106443060212 -0.035722938819 -0.013776727667
  0.232114773339 -0.086623031132 -0.033765527972
  0.364365356978 -0.169075680033 -0.068073992679
  0.307543329823 -0.210082919159 -0.088988358190
  0.080427609236  0.026406419383  0.011623498266
 -0.002091693044  0.532870729541  0.332719841821
  0.003318226523  0.503069631865  0.468464167141
 -0.001366676052  0.088520077363 -0.174415197404
  0.000410476963 -0.001291440405 -0.725136586372
 -0.000328321078  0.002321481249 -0.376974869398
  0.000091609618 -0.000314521512 -0.011847649548
  0.000007736566 -0.000091037106  0.007674716299
   15    2    6    6
  84.73246086      8.697981773    
  49597.56000      8521.695000      2303.899000      783.0395000    
  305.5494000      131.1653000      60.06042000      28.47848000    
  13.71275000      6.359916000      2.903849000      1.270245000    
 0.4810799000     0.1528591000     0.4856343000E-01
  0.000016436669 -0.000006204611
  0.000246402459 -0.000093675541
  0.001889023935 -0.000716042646
  0.009964980155 -0.003823045028
  0.039612489513 -0.015359180644
  0.119508609983 -0.048146102636
  0.263338341004 -0.110433985883
  0.386817554819 -0.174953937766
  0.293029100159 -0.095741948338
  0.071899799557  0.248046529924
  0.001983035802  0.516899278597
  0.001435714255  0.353137111072
 -0.000191386526  0.048746729833
  0.000067757100 -0.007669486021
 -0.000028889295  0.000268737002
    9    1   10
  2.121039826    
  457.9123000      128.5433000      48.13583000      20.16190000    
  9.037338000      4.122069000      1.835645000     0.7793226000    
 0.2999676000    
  0.000572777523
  0.005773507749
  0.029839153394
  0.099725215547
  0.223464532134
  0.332889029453
  0.346315226026
  0.241437143473
  0.053862957442
*
Spectral Representation Operator
Core primitive basis
Exchange
End of Spectral Representation Operator
 

/Ga.ECP.Seijo.0s.0s.0e-AIMP-Sm3Ga5O12-Ga(tet).      
Embedding AIMP of Gat(3+) in Sm3Ga5O12 
made Mon.Feb.20.20:20:26.CET.2012
   3.000    0
    0    0
*
* External AIMP: 
* Local Pot. Param. : (ECP convention)
*                      A(AIMP)=-Zeff*A(ECP)
*
M1
   13
  400220.0000      66539.00000      16570.00000      4835.000000    
  1593.400000      572.2500000      201.5700000      76.81300000    
  34.76500000      10.34670000      4.761200000      2.090400000    
 0.8457400000    
 0.7138649289E-01 0.8053754753E-01 0.1437234927     0.2476224830    
 0.4015197481     0.5293736385     0.6397052500      1.250552537    
  1.158884442      1.244039314      2.303681207      1.104457663    
 0.1578495186    
M2
    0
COREREP
   1.000
PROJOP
    2
   20    3    2    2    2
  756.0933805      96.11891658      12.68302340    
  70959040.00      7603324.000      1319240.000      302670.5000    
  83251.81000      25933.12000      8976.547000      3372.096000    
  1348.620000      567.5549000      248.1887000      111.6749000    
  49.24165000      23.27517000      11.08148000      4.899352000    
  2.300821000      1.026582000     0.2092229000     0.7348584000E-01
  0.000013491979 -0.000004279739 -0.000001668566
  0.000131163478 -0.000043089194 -0.000017184378
  0.000530468661 -0.000171734236 -0.000067800424
 -0.000311934855  0.000104662388  0.000042489454
  0.001402142716 -0.000441492850 -0.000170389411
  0.003678574123 -0.001145099585 -0.000435827241
  0.013499433298 -0.004243445777 -0.001623677542
  0.040090962260 -0.012868252518 -0.004926138021
  0.106443011041 -0.035723353370 -0.013777831536
  0.232114724255 -0.086622910221 -0.033780123913
  0.364365049960 -0.169078371102 -0.068071547058
  0.307543515292 -0.210079785347 -0.089058337371
  0.080427693007  0.026392946110  0.011753824607
 -0.002090919339  0.532904895698  0.332507883379
  0.003317023709  0.503034124544  0.469244167147
 -0.001365054477  0.088575850092 -0.175848075790
  0.000408418547 -0.001389017797 -0.723520338453
 -0.000326664919  0.002402979903 -0.378625207603
  0.000090541365 -0.000371139691 -0.010148810413
  0.000007897874 -0.000082832424  0.007378684162
   15    2    6    6
  84.94409642      8.903592020    
  49597.56000      8521.695000      2303.899000      783.0395000    
  305.5494000      131.1653000      60.06042000      28.47848000    
  13.71275000      6.359916000      2.903849000      1.270245000    
 0.4810799000     0.1528591000     0.4856343000E-01
 -0.000016436727  0.000006206331
 -0.000246404027  0.000093687713
 -0.001889031115  0.000716229458
 -0.009965040417  0.003823576319
 -0.039612628308  0.015363203342
 -0.119509284858  0.048152516894
 -0.263339101138  0.110466674268
 -0.386823725817  0.174968233303
 -0.293028569772  0.095814261029
 -0.071893083831 -0.248284064540
 -0.001973938591 -0.516864098844
 -0.001440372320 -0.353147682363
  0.000195000295 -0.048586659408
 -0.000065944892  0.007915862139
  0.000027822457 -0.000532398050
    9    1   10
  2.327685828    
  457.9123000      128.5433000      48.13583000      20.16190000    
  9.037338000      4.122069000      1.835645000     0.7793226000    
 0.2999676000    
  0.000572675285
  0.005771668770
  0.029833239119
  0.099694308444
  0.223433889924
  0.332743966589
  0.346193550924
  0.240539274635
  0.056356740313
*
Spectral Representation Operator
Core primitive basis
Exchange
End of Spectral Representation Operator
 

/Ga.ECP.Seijo.20s15p9d.1s1p1d.0e-AIMP-Sm3Ga5O12-Ga(tet).      
Embedding AIMP of Gat(3+) in Sm3Ga5O12 with orthogonality orbitals
made Mon.Feb.20.20:20:26.CET.2012
   3.000    2
   20    1
  70959040.00      7603324.000      1319240.000      302670.5000    
  83251.81000      25933.12000      8976.547000      3372.096000    
  1348.620000      567.5549000      248.1887000      111.6749000    
  49.24165000      23.27517000      11.08148000      4.899352000    
  2.300821000      1.026582000     0.2092229000     0.7348584000E-01
  -0.000001668566
  -0.000017184378
  -0.000067800424
   0.000042489454
  -0.000170389411
  -0.000435827241
  -0.001623677542
  -0.004926138021
  -0.013777831536
  -0.033780123913
  -0.068071547058
  -0.089058337371
   0.011753824607
   0.332507883379
   0.469244167147
  -0.175848075790
  -0.723520338453
  -0.378625207603
  -0.010148810413
   0.007378684162
   15    1
  49597.56000      8521.695000      2303.899000      783.0395000    
  305.5494000      131.1653000      60.06042000      28.47848000    
  13.71275000      6.359916000      2.903849000      1.270245000    
 0.4810799000     0.1528591000     0.4856343000E-01
   0.000006206331
   0.000093687713
   0.000716229458
   0.003823576319
   0.015363203342
   0.048152516894
   0.110466674268
   0.174968233303
   0.095814261029
  -0.248284064540
  -0.516864098844
  -0.353147682363
  -0.048586659408
   0.007915862139
  -0.000532398050
    9    1 
  457.9123000      128.5433000      48.13583000      20.16190000    
  9.037338000      4.122069000      1.835645000     0.7793226000    
 0.2999676000    
  0.000572675285
  0.005771668770
  0.029833239119
  0.099694308444
  0.223433889924
  0.332743966589
  0.346193550924
  0.240539274635
  0.056356740313
*
* External AIMP: 
* Local Pot. Param. : (ECP convention)
*                      A(AIMP)=-Zeff*A(ECP)
*
M1
   13
  400220.0000      66539.00000      16570.00000      4835.000000    
  1593.400000      572.2500000      201.5700000      76.81300000    
  34.76500000      10.34670000      4.761200000      2.090400000    
 0.8457400000    
 0.7138649289E-01 0.8053754753E-01 0.1437234927     0.2476224830    
 0.4015197481     0.5293736385     0.6397052500      1.250552537    
  1.158884442      1.244039314      2.303681207      1.104457663    
 0.1578495186    
M2
    0
COREREP
   1.000
PROJOP
    2
   20    3    2    2    2
  756.0933805      96.11891658      12.68302340    
  70959040.00      7603324.000      1319240.000      302670.5000    
  83251.81000      25933.12000      8976.547000      3372.096000    
  1348.620000      567.5549000      248.1887000      111.6749000    
  49.24165000      23.27517000      11.08148000      4.899352000    
  2.300821000      1.026582000     0.2092229000     0.7348584000E-01
  0.000013491979 -0.000004279739 -0.000001668566
  0.000131163478 -0.000043089194 -0.000017184378
  0.000530468661 -0.000171734236 -0.000067800424
 -0.000311934855  0.000104662388  0.000042489454
  0.001402142716 -0.000441492850 -0.000170389411
  0.003678574123 -0.001145099585 -0.000435827241
  0.013499433298 -0.004243445777 -0.001623677542
  0.040090962260 -0.012868252518 -0.004926138021
  0.106443011041 -0.035723353370 -0.013777831536
  0.232114724255 -0.086622910221 -0.033780123913
  0.364365049960 -0.169078371102 -0.068071547058
  0.307543515292 -0.210079785347 -0.089058337371
  0.080427693007  0.026392946110  0.011753824607
 -0.002090919339  0.532904895698  0.332507883379
  0.003317023709  0.503034124544  0.469244167147
 -0.001365054477  0.088575850092 -0.175848075790
  0.000408418547 -0.001389017797 -0.723520338453
 -0.000326664919  0.002402979903 -0.378625207603
  0.000090541365 -0.000371139691 -0.010148810413
  0.000007897874 -0.000082832424  0.007378684162
   15    2    6    6
  84.94409642      8.903592020    
  49597.56000      8521.695000      2303.899000      783.0395000    
  305.5494000      131.1653000      60.06042000      28.47848000    
  13.71275000      6.359916000      2.903849000      1.270245000    
 0.4810799000     0.1528591000     0.4856343000E-01
 -0.000016436727  0.000006206331
 -0.000246404027  0.000093687713
 -0.001889031115  0.000716229458
 -0.009965040417  0.003823576319
 -0.039612628308  0.015363203342
 -0.119509284858  0.048152516894
 -0.263339101138  0.110466674268
 -0.386823725817  0.174968233303
 -0.293028569772  0.095814261029
 -0.071893083831 -0.248284064540
 -0.001973938591 -0.516864098844
 -0.001440372320 -0.353147682363
  0.000195000295 -0.048586659408
 -0.000065944892  0.007915862139
  0.000027822457 -0.000532398050
    9    1   10
  2.327685828    
  457.9123000      128.5433000      48.13583000      20.16190000    
  9.037338000      4.122069000      1.835645000     0.7793226000    
 0.2999676000    
  0.000572675285
  0.005771668770
  0.029833239119
  0.099694308444
  0.223433889924
  0.332743966589
  0.346193550924
  0.240539274635
  0.056356740313
*
Spectral Representation Operator
Core primitive basis
Exchange
End of Spectral Representation Operator
 

/O.ECP.Seijo.0s.0s.0e-AIMP-Sm3Ga5O12-O.         
Embedding AIMP of O(2-) in Sm3Ga5O12 
made Mon.Feb.20.20:30:32.CET.2012
  -2.000    0
    0    0
*
* External AIMP: 
* Local Pot. Param. : (ECP convention)
*                      A(AIMP)=-Zeff*A(ECP)
*
M1
   12
  282885.8300      34740.01200      6502.573000      1486.426000    
  406.8273300      124.8370000      41.98461900      13.81633000    
  4.272136000      1.610321600     0.6078900000     0.2644720000    
 -.2172111178E-01 -.3182973071E-01 -.6527347674E-01 -.1217119272    
 -.2184654822     -.3835055555     -.5103436798     -.4575237437    
 -.7595321805     -1.292060011     -1.065966872     -.7206622917E-01
M2
    0
COREREP
   1.000
PROJOP
    1
    8    2    2    2
  40.35461874      1.988285347    
  2048.050000      309.0990000      70.41410000      19.70120000    
  6.031450000      10.22970000     0.9340900000     0.2862500000    
  0.006202110247  0.001318716989
  0.045639572293  0.009596856244
  0.200059006256  0.046776324467
  0.473801507788  0.114464131728
  0.380698729628  0.097611019544
  0.029028348930  0.070085994175
  0.024636410493 -0.463296538822
 -0.005634708469 -0.641066182561
    6    1    6
 0.5325570181    
  34.97120000      7.845090000      2.303320000     0.7219800000    
 0.2155300000     0.5900000000E-01
 -0.013143398227
 -0.084965587016
 -0.249414096112
 -0.431851185225
 -0.515685043609
  0.091802278357
*
Spectral Representation Operator
Core primitive basis
Exchange
End of Spectral Representation Operator
 
 
********************************************************************************
*         E.7.X. Gd3Ga5O12 (GdGG)
********************************************************************************
*           E.7.X.a. Gd3Ga5O12
*             Structure:
*                    H.Sawada, J. Solid State Chem 132 (1997) 300-307
*                    (Ia-3d; a=12.3829A, x=-0.0289, =0.0542, z=0.1494)
*             Embedding potentials:
*                    L.Seijo, Z.Barandiaran, to be published
*                    Out of SCEI DKH-HF calculations
*             /Gd.ECP.Seijo.0s.0s.0e-AIMP-Gd3Ga5O12-Gd.
*             /Ga.ECP.Seijo.0s.0s.0e-AIMP-Gd3Ga5O12-Ga(oct).
*             /Ga.ECP.Seijo.0s.0s.0e-AIMP-Gd3Ga5O12-Ga(tet).
*             /Ga.ECP.Seijo.20s15p9d.1s1p1d.0e-AIMP-Gd3Ga5O12-Ga(tet).
*             /O.ECP.Seijo.0s.0s.0e-AIMP-Gd3Ga5O12-O.
********************************************************************************
/Gd.ECP.Seijo.0s.0s.0e-AIMP-Gd3Ga5O12-Gd.       
Embedding AIMP of Gd(3+) in Gd3Ga5O12 
made Mon.Feb.20.14:57:24.CET.2012
   3.000    0
    0    0
*
* External AIMP: 
* Local Pot. Param. : (ECP convention)
*                      A(AIMP)=-Zeff*A(ECP)
*
M1
   15
  523680.0000      106780.0000      31494.00000      10460.30000    
  3779.000000      1402.150000      536.5500000      242.9700000    
  84.13700000      42.61300000      8.730000000      5.350700000    
  2.229080000      1.088570000     0.5771000000    
 0.1802601415     0.1693639107     0.2809665360     0.4414797323    
 0.6121046611     0.7652461585      1.341062190      1.687638160    
  1.478671739      3.982487658      3.343705611      2.542867050    
  1.293743782      1.787457479     0.4262785253    
M2
    0
COREREP
   1.000
PROJOP
    3
   27    5    2    2    2    2    2
  3706.501740      621.1535789      141.5000682      30.14957067    
  4.140135021    
 0.3700172100E+11  4423337400.      736627460.0      157466940.0    
  39988049.00      11295642.00      3442911.200      1134401.600    
  396957.8400      146564.4700      56594.52400      22562.05300    
  9206.733200      3830.103100      1630.518600      716.1974000    
  325.1370300      141.1383600      65.40259600      26.42438900    
  13.67116900      5.375686200      2.679150400     0.7681474100    
 0.3539498300     0.6287505600E-01 0.2555431900E-01
 -0.000000917332 -0.000000349079 -0.000000146245  0.000000080682 -0.000000028023
  0.000003986801  0.000001516565  0.000000635878 -0.000000350433  0.000000121857
 -0.000014205728 -0.000005391781 -0.000002271837  0.000001243948 -0.000000435363
  0.000054650713  0.000020522916  0.000008850698 -0.000004699154  0.000001693751
  0.000441243452  0.000158241570  0.000075196114 -0.000035000125  0.000014256059
  0.000565846125  0.000209735154  0.000093340492 -0.000047530850  0.000017847730
  0.001522767165  0.000544739773  0.000261762638 -0.000120008158  0.000049395628
  0.002956203973  0.001096649228  0.000492140383 -0.000248213503  0.000094785802
  0.006031192528  0.002179540110  0.001043014662 -0.000481212819  0.000193678395
  0.011940542533  0.004446372039  0.002038870288 -0.001004849528  0.000407301139
  0.023817955321  0.008874915770  0.004168000868 -0.001990286500  0.000796893656
  0.048161104373  0.018485465309  0.008621263217 -0.004174881050  0.001682457065
  0.098177114618  0.038894268510  0.018373454802 -0.008856186090  0.003561419183
  0.191812873814  0.082367549581  0.039115872885 -0.018985951851  0.007651222286
  0.315420316368  0.154019900910  0.075529604203 -0.036697231876  0.014790794617
  0.335137810966  0.212121729203  0.107189009297 -0.053004788966  0.021448903209
  0.150182363890  0.041585932987  0.019831215652 -0.008751693897  0.003460549067
  0.011788681058 -0.489050443702 -0.398056518872  0.215914389944 -0.089250435501
 -0.000097170711 -0.569452036447 -0.612596427300  0.372299844416 -0.158142987880
 -0.000175559702 -0.104811689343  0.413916529825 -0.385206983026  0.179927900794
  0.000095789196  0.017283240332  0.847325261269 -1.020242427062  0.510274605741
 -0.000055238833 -0.006053069094  0.124798464981  0.559538348589 -0.412307176264
  0.000034469279  0.002947017031 -0.017322597694  0.893121971585 -0.838839624444
 -0.000011938313 -0.000945733945  0.004585892200  0.060705502122  0.751721215151
  0.000005476078  0.000456689435 -0.002196512253 -0.013885455776  0.633428057575
 -0.000001425339 -0.000115309235  0.000521543485  0.002484950201 -0.010767148557
  0.000000711767  0.000053350607 -0.000239486091 -0.001135829747 -0.000884299682
   23    4    6    6    6    6
  553.6214832      120.0077452      22.82213452      2.100363901    
  52152768.00      7440218.200      1535484.400      390559.5700    
  115469.6900      38541.38300      14246.67200      5740.201200    
  2485.279400      1142.789900      552.6307600      278.5198000    
  145.3092600      77.64298100      41.88607700      22.88097100    
  12.55486200      6.669495900      3.480984200      1.766148600    
 0.8173020900     0.3708105400     0.1513552600    
 -0.000000450550  0.000000179853 -0.000000161203  0.000000032408
  0.000019254386 -0.000009293125  0.000004734471  0.000001263848
  0.000049081997 -0.000024789752  0.000010632477  0.000005058030
  0.000141218591 -0.000068271623  0.000034797698  0.000008998819
  0.000383476172 -0.000190631101  0.000088623670  0.000035886813
  0.001055754248 -0.000522725440  0.000249490957  0.000090065380
  0.002945444633 -0.001466984461  0.000696454810  0.000260099056
  0.008318431496 -0.004171224303  0.001985950030  0.000732201247
  0.023197105729 -0.011767059472  0.005617246378  0.002091247811
  0.061008098041 -0.031616171784  0.015155792300  0.005597830531
  0.140829760689 -0.075536291472  0.036526113290  0.013649426031
  0.260084030207 -0.146567403899  0.071629007056  0.026486943292
  0.339961943066 -0.199295519756  0.098660089224  0.037342624025
  0.259693165553 -0.099353319838  0.039715716031  0.012922592920
  0.088836672145  0.226376255581 -0.162580982908 -0.062715244560
  0.008217475259  0.508767250535 -0.398216844128 -0.168834217205
  0.000643783576  0.339816814629 -0.198724266904 -0.061706262183
 -0.000336529403  0.068755197007  0.420052941390  0.215730823040
  0.000061071876  0.002352189493  0.603937190437  0.398432630020
 -0.000063631319  0.000753255837  0.207383267863 -0.011214137781
  0.000024305264 -0.000200705117  0.012127330979 -0.537927965993
 -0.000009134461  0.000076838180  0.001224433100 -0.573042576750
  0.000002246256 -0.000024429238 -0.000486843589 -0.021336965104
   15    2   10   10
  91.01395692      12.30946436    
  19762.54400      4952.939600      1693.281500      698.3871200    
  305.4837600      140.5349200      67.86090500      33.70837200    
  17.12325000      8.614081100      4.198487800      1.950851800    
 0.7805844900     0.2816736100     0.9055903700E-01
  0.000035517078 -0.000016832622
  0.000284612307 -0.000136389363
  0.001625432334 -0.000773522885
  0.007971452607 -0.003846480960
  0.034452882434 -0.016652161388
  0.112760999704 -0.055798225997
  0.260373767478 -0.129201388110
  0.388612970634 -0.186144392892
  0.311302499104 -0.067987081890
  0.098885106335  0.292212936711
  0.007318619329  0.514700166994
  0.000566470417  0.306369344419
 -0.000057773560  0.044570346760
  0.000044569559 -0.001196367277
 -0.000012171895  0.000320165454
   10    1    7
 0.1248649520    
  383.5737200      131.6883000      56.21669300      26.30729400    
  12.94802400      6.444507800      3.133485100      1.469537900    
 0.6527711300     0.2616560700    
  0.000586064093
  0.005125219607
  0.024745371140
  0.076981273726
  0.174926107089
  0.280360104429
  0.328065749072
  0.286482854392
  0.183434850056
  0.080761411289
*
Spectral Representation Operator
Core primitive basis
Exchange
End of Spectral Representation Operator
 

/Ga.ECP.Seijo.0s.0s.0e-AIMP-Gd3Ga5O12-Ga(oct).      
Embedding AIMP of Gao(3+) in Gd3Ga5O12 
made Mon.Feb.20.15:07:45.CET.2012
   3.000    0
    0    0
*
* External AIMP: 
* Local Pot. Param. : (ECP convention)
*                      A(AIMP)=-Zeff*A(ECP)
*
M1
   13
  401240.0000      66740.00000      16610.00000      4849.300000    
  1600.000000      574.9600000      202.7700000      77.24200000    
  34.96800000      10.44360000      4.803500000      2.113500000    
 0.8608800000    
 0.7127780902E-01 0.8044110693E-01 0.1435776945     0.2469728259    
 0.4004289959     0.5287505851     0.6373250174      1.245038914    
  1.165158876      1.224297309      2.306006172      1.121409518    
 0.1626485097    
M2
    0
COREREP
   1.000
PROJOP
    2
   20    3    2    2    2
  755.9405914      95.96557721      12.53581895    
  70959040.00      7603324.000      1319240.000      302670.5000    
  83251.81000      25933.12000      8976.547000      3372.096000    
  1348.620000      567.5549000      248.1887000      111.6749000    
  49.24165000      23.27517000      11.08148000      4.899352000    
  2.300821000      1.026582000     0.2092229000     0.7348584000E-01
  0.000013491980 -0.000004279725 -0.000001668245
  0.000131163490 -0.000043089088 -0.000017179583
  0.000530468705 -0.000171733731 -0.000067784899
 -0.000311934841  0.000104662154  0.000042482137
  0.001402143090 -0.000441489711 -0.000170357514
  0.003678574871 -0.001145097550 -0.000435663294
  0.013499438369 -0.004243402552 -0.001623465762
  0.040090969366 -0.012868250369 -0.004924105394
  0.106443062107 -0.035722917005 -0.013776810208
  0.232114768517 -0.086623155381 -0.033763510690
  0.364365368057 -0.169075454783 -0.068075926643
  0.307543302376 -0.210083678070 -0.088977267722
  0.080427675497  0.026408154966  0.011599077914
 -0.002091818506  0.532867273872  0.332769841661
  0.003318410030  0.503076851418  0.468340143269
 -0.001366940964  0.088507769120 -0.174194658249
  0.000410793553 -0.001276704237 -0.725483702740
 -0.000328567272  0.002308736069 -0.376540396863
  0.000091805275 -0.000303604366 -0.012236335804
  0.000007722911 -0.000091745254  0.007668412899
   15    2    6    6
  84.79081094      8.755808575    
  49597.56000      8521.695000      2303.899000      783.0395000    
  305.5494000      131.1653000      60.06042000      28.47848000    
  13.71275000      6.359916000      2.903849000      1.270245000    
 0.4810799000     0.1528591000     0.4856343000E-01
 -0.000016436681 -0.000006204636
 -0.000246402609 -0.000093674993
 -0.001889025297 -0.000716044751
 -0.009964986454 -0.003823025120
 -0.039612519408 -0.015359228031
 -0.119508688488 -0.048145839411
 -0.263338556823 -0.110434601119
 -0.386817830210 -0.174952224606
 -0.293029221807 -0.095745372120
 -0.071898999401  0.248059925943
 -0.001982605787  0.516887802782
 -0.001435817531  0.353140746615
  0.000192129020  0.048615777373
 -0.000070272056 -0.007284987537
  0.000029913247  0.000140270237
    9    1   10
  2.178706404    
  457.9123000      128.5433000      48.13583000      20.16190000    
  9.037338000      4.122069000      1.835645000     0.7793226000    
 0.2999676000    
 -0.000572850430
 -0.005772989155
 -0.029842073408
 -0.099716034300
 -0.223496262835
 -0.332815421019
 -0.346468226952
 -0.241020063847
 -0.054407517422
*
Spectral Representation Operator
Core primitive basis
Exchange
End of Spectral Representation Operator
 

/Ga.ECP.Seijo.0s.0s.0e-AIMP-Gd3Ga5O12-Ga(tet).      
Embedding AIMP of Gat(3+) in Gd3Ga5O12 
made Mon.Feb.20.15:18:15.CET.2012
   3.000    0
    0    0
*
* External AIMP: 
* Local Pot. Param. : (ECP convention)
*                      A(AIMP)=-Zeff*A(ECP)
*
M1
   13
  400640.0000      66594.00000      16564.00000      4833.700000    
  1594.200000      572.6900000      201.7600000      76.87600000    
  34.78700000      10.35160000      4.761800000      2.088900000    
 0.8421300000    
 0.7134011065E-01 0.8056290927E-01 0.1438308806     0.2474963928    
 0.4012108144     0.5292655047     0.6393069100      1.249962072    
  1.159903695      1.243396571      2.304891587      1.104850893    
 0.1573149933    
M2
    0
COREREP
   1.000
PROJOP
    2
   20    3    2    2    2
  756.0208034      96.04626922      12.61022473    
  70959040.00      7603324.000      1319240.000      302670.5000    
  83251.81000      25933.12000      8976.547000      3372.096000    
  1348.620000      567.5549000      248.1887000      111.6749000    
  49.24165000      23.27517000      11.08148000      4.899352000    
  2.300821000      1.026582000     0.2092229000     0.7348584000E-01
  0.000013491979 -0.000004279739 -0.000001668498
  0.000131163478 -0.000043089209 -0.000017183397
  0.000530468661 -0.000171734273 -0.000067797086
 -0.000311934857  0.000104662366  0.000042486836
  0.001402142718 -0.000441492923 -0.000170385180
  0.003678574073 -0.001145100795 -0.000435809362
  0.013499433366 -0.004243445691 -0.001623663421
  0.040090961620 -0.012868267996 -0.004925900417
  0.106443012195 -0.035723344116 -0.013777829555
  0.232114718395 -0.086623044947 -0.033778119239
  0.364365055237 -0.169078219172 -0.068072915070
  0.307543491093 -0.210080522250 -0.089047859612
  0.080427763934  0.026394433869  0.011731703446
 -0.002091037695  0.532902248734  0.332551531538
  0.003317193040  0.503041002222  0.469130707039
 -0.001365303445  0.088563627636 -0.175655133948
  0.000408717325 -0.001375436104 -0.723834023142
 -0.000326902564  0.002390779998 -0.378179853448
  0.000090791701 -0.000357205958 -0.010658948867
  0.000007820944 -0.000087065816  0.007512457712
   15    2    6    6
  84.87143577      8.830115563    
  49597.56000      8521.695000      2303.899000      783.0395000    
  305.5494000      131.1653000      60.06042000      28.47848000    
  13.71275000      6.359916000      2.903849000      1.270245000    
 0.4810799000     0.1528591000     0.4856343000E-01
 -0.000016436746 -0.000006206281
 -0.000246404273 -0.000093688546
 -0.001889033299 -0.000716225083
 -0.009965050705 -0.003823607104
 -0.039612675725 -0.015363114920
 -0.119509411630 -0.048152982197
 -0.263339442660 -0.110465795959
 -0.386824231203 -0.174971710143
 -0.293028810354 -0.095807647458
 -0.071891548565  0.248281002756
 -0.001973549494  0.516894828466
 -0.001440034192  0.353066218618
  0.000195070256  0.048575960794
 -0.000067716190 -0.007640748435
  0.000028701448  0.000410368299
    9    1   10
  2.254110134    
  457.9123000      128.5433000      48.13583000      20.16190000    
  9.037338000      4.122069000      1.835645000     0.7793226000    
 0.2999676000    
  0.000572694702
  0.005771018176
  0.029833666242
  0.099683015087
  0.223444210081
  0.332675141162
  0.346269052619
  0.240179781900
  0.057019465961
*
Spectral Representation Operator
Core primitive basis
Exchange
End of Spectral Representation Operator
 

/Ga.ECP.Seijo.20s15p9d.1s1p1d.0e-AIMP-Gd3Ga5O12-Ga(tet).      
Embedding AIMP of Gat(3+) in Gd3Ga5O12 with orthogonality orbitals
made Mon.Feb.20.15:18:15.CET.2012
   3.000    2
   20    1
  70959040.00      7603324.000      1319240.000      302670.5000    
  83251.81000      25933.12000      8976.547000      3372.096000    
  1348.620000      567.5549000      248.1887000      111.6749000    
  49.24165000      23.27517000      11.08148000      4.899352000    
  2.300821000      1.026582000     0.2092229000     0.7348584000E-01
  -0.000001668498
  -0.000017183397
  -0.000067797086
   0.000042486836
  -0.000170385180
  -0.000435809362
  -0.001623663421
  -0.004925900417
  -0.013777829555
  -0.033778119239
  -0.068072915070
  -0.089047859612
   0.011731703446
   0.332551531538
   0.469130707039
  -0.175655133948
  -0.723834023142
  -0.378179853448
  -0.010658948867
   0.007512457712
   15    1
  49597.56000      8521.695000      2303.899000      783.0395000    
  305.5494000      131.1653000      60.06042000      28.47848000    
  13.71275000      6.359916000      2.903849000      1.270245000    
 0.4810799000     0.1528591000     0.4856343000E-01
  -0.000006206281
  -0.000093688546
  -0.000716225083
  -0.003823607104
  -0.015363114920
  -0.048152982197
  -0.110465795959
  -0.174971710143
  -0.095807647458
   0.248281002756
   0.516894828466
   0.353066218618
   0.048575960794
  -0.007640748435
   0.000410368299
    9    1
  457.9123000      128.5433000      48.13583000      20.16190000    
  9.037338000      4.122069000      1.835645000     0.7793226000    
 0.2999676000    
  0.000572694702
  0.005771018176
  0.029833666242
  0.099683015087
  0.223444210081
  0.332675141162
  0.346269052619
  0.240179781900
  0.057019465961
*
* External AIMP: 
* Local Pot. Param. : (ECP convention)
*                      A(AIMP)=-Zeff*A(ECP)
*
M1
   13
  400640.0000      66594.00000      16564.00000      4833.700000    
  1594.200000      572.6900000      201.7600000      76.87600000    
  34.78700000      10.35160000      4.761800000      2.088900000    
 0.8421300000    
 0.7134011065E-01 0.8056290927E-01 0.1438308806     0.2474963928    
 0.4012108144     0.5292655047     0.6393069100      1.249962072    
  1.159903695      1.243396571      2.304891587      1.104850893    
 0.1573149933    
M2
    0
COREREP
   1.000
PROJOP
    2
   20    3    2    2    2
  756.0208034      96.04626922      12.61022473    
  70959040.00      7603324.000      1319240.000      302670.5000    
  83251.81000      25933.12000      8976.547000      3372.096000    
  1348.620000      567.5549000      248.1887000      111.6749000    
  49.24165000      23.27517000      11.08148000      4.899352000    
  2.300821000      1.026582000     0.2092229000     0.7348584000E-01
  0.000013491979 -0.000004279739 -0.000001668498
  0.000131163478 -0.000043089209 -0.000017183397
  0.000530468661 -0.000171734273 -0.000067797086
 -0.000311934857  0.000104662366  0.000042486836
  0.001402142718 -0.000441492923 -0.000170385180
  0.003678574073 -0.001145100795 -0.000435809362
  0.013499433366 -0.004243445691 -0.001623663421
  0.040090961620 -0.012868267996 -0.004925900417
  0.106443012195 -0.035723344116 -0.013777829555
  0.232114718395 -0.086623044947 -0.033778119239
  0.364365055237 -0.169078219172 -0.068072915070
  0.307543491093 -0.210080522250 -0.089047859612
  0.080427763934  0.026394433869  0.011731703446
 -0.002091037695  0.532902248734  0.332551531538
  0.003317193040  0.503041002222  0.469130707039
 -0.001365303445  0.088563627636 -0.175655133948
  0.000408717325 -0.001375436104 -0.723834023142
 -0.000326902564  0.002390779998 -0.378179853448
  0.000090791701 -0.000357205958 -0.010658948867
  0.000007820944 -0.000087065816  0.007512457712
   15    2    6    6
  84.87143577      8.830115563    
  49597.56000      8521.695000      2303.899000      783.0395000    
  305.5494000      131.1653000      60.06042000      28.47848000    
  13.71275000      6.359916000      2.903849000      1.270245000    
 0.4810799000     0.1528591000     0.4856343000E-01
 -0.000016436746 -0.000006206281
 -0.000246404273 -0.000093688546
 -0.001889033299 -0.000716225083
 -0.009965050705 -0.003823607104
 -0.039612675725 -0.015363114920
 -0.119509411630 -0.048152982197
 -0.263339442660 -0.110465795959
 -0.386824231203 -0.174971710143
 -0.293028810354 -0.095807647458
 -0.071891548565  0.248281002756
 -0.001973549494  0.516894828466
 -0.001440034192  0.353066218618
  0.000195070256  0.048575960794
 -0.000067716190 -0.007640748435
  0.000028701448  0.000410368299
    9    1   10
  2.254110134    
  457.9123000      128.5433000      48.13583000      20.16190000    
  9.037338000      4.122069000      1.835645000     0.7793226000    
 0.2999676000    
  0.000572694702
  0.005771018176
  0.029833666242
  0.099683015087
  0.223444210081
  0.332675141162
  0.346269052619
  0.240179781900
  0.057019465961
*
Spectral Representation Operator
Core primitive basis
Exchange
End of Spectral Representation Operator
 

/O.ECP.Seijo.0s.0s.0e-AIMP-Gd3Ga5O12-O.         
Embedding AIMP of O(2-) in Gd3Ga5O12 
made Mon.Feb.20.15:27:37.CET.2012
  -2.000    0
    0    0
*
* External AIMP: 
* Local Pot. Param. : (ECP convention)
*                      A(AIMP)=-Zeff*A(ECP)
*
M1
   12
  282885.8300      34740.01200      6502.573000      1486.426000    
  406.8273300      124.8370000      41.98461900      13.81633000    
  4.272136000      1.610321600     0.6078900000     0.2644720000    
 -.2172166356E-01 -.3183275297E-01 -.6527198086E-01 -.1217270258    
 -.2184557352     -.3835536345     -.5103096219     -.4576916772    
 -.7592902266     -1.293071505     -1.065370981     -.7170319517E-01
M2
    0
COREREP
   1.000
PROJOP
    1
    8    2    2    2
  40.33249305      1.967120963    
  2048.050000      309.0990000      70.41410000      19.70120000    
  6.031450000      10.22970000     0.9340900000     0.2862500000    
  0.006202102945  0.001318639448
  0.045639539496  0.009596593505
  0.200058683107  0.046772425189
  0.473801738422  0.114473919873
  0.380702201460  0.097662328168
  0.029024814471  0.070029180685
  0.024637699146 -0.463271040192
 -0.005635456248 -0.641096267061
    6    1    6
 0.5116143128    
  34.97120000      7.845090000      2.303320000     0.7219800000    
 0.2155300000     0.5900000000E-01
 -0.013141417677
 -0.085000414388
 -0.249280185655
 -0.432420889771
 -0.515006129272
  0.091511740895
*
Spectral Representation Operator
Core primitive basis
Exchange
End of Spectral Representation Operator
 
 
********************************************************************************
*         E.7.X. Tb3Ga5O12 (TbGG)
********************************************************************************
*           E.7.X.a. Tb3Ga5O12
*             Structure:
*                    H.Sawada, J. Solid State Chem 132 (1997) 300-307
*                    (Ia-3d; a=12.3474A, x=-0.0282, =0.0547, z=0.1495
*             Embedding potentials:
*                    L.Seijo, Z.Barandiaran, to be published
*                    Out of SCEI DKH-HF calculations
*             /Tb.ECP.Seijo.0s.0s.0e-AIMP-Tb3Ga5O12-Tb.
*             /Ga.ECP.Seijo.0s.0s.0e-AIMP-Tb3Ga5O12-Ga(oct).
*             /Ga.ECP.Seijo.0s.0s.0e-AIMP-Tb3Ga5O12-Ga(tet).
*             /Ga.ECP.Seijo.20s15p9d.1s1p1d.0e-AIMP-Tb3Ga5O12-Ga(tet).
*             /O.ECP.Seijo.0s.0s.0e-AIMP-Tb3Ga5O12-O.
********************************************************************************
/Tb.ECP.Seijo.0s.0s.0e-AIMP-Tb3Ga5O12-Tb.       
Embedding AIMP of Tb(3+) in Tb3Ga5O12
made Tue.Feb.21.12:31:03.CET.2012
   3.000    0
    0    0
*
* External AIMP: 
* Local Pot. Param. : (ECP convention)
*                      A(AIMP)=-Zeff*A(ECP)
*
M1
   15
  526390.0000      108026.0000      32017.00000      10656.30000    
  3852.400000      1432.370000      550.7800000      249.9500000    
  86.33200000      44.19200000      9.124700000      5.440400000    
  2.189080000      1.082420000     0.5884700000    
 0.1841328770     0.1718374365     0.2847684578     0.4469830657    
 0.6169296261     0.7716654312      1.357757561      1.686136670    
  1.519718629      3.968838079      3.489449318      2.646186843    
  1.428178822      1.717180507     0.3769033356    
M2
    0
COREREP
   1.000
PROJOP
    3
   27    5    2    2    2    2    2
  3835.949835      645.6788880      147.5730493      31.42405556    
  4.339459658    
 0.4936064000E+11  5926458300.      1008157400.      204930140.0    
  49630464.00      13544932.00      4055933.900      1298688.600    
  439272.3300      157245.3100      59168.63000      23125.26100    
  9439.635800      4021.409700      1759.060500      786.8704600    
  361.4796600      151.7643900      69.82561000      27.83161200    
  14.39973200      5.539406900      2.750735600     0.7620653900    
 0.3421758000     0.5773643100E-01 0.2407913600E-01
  0.000000155323  0.000000073099  0.000000020585 -0.000000019779  0.000000005922
 -0.000000670504 -0.000000315505 -0.000000088885  0.000000085362 -0.000000025589
  0.000002183195  0.000001027230  0.000000289482 -0.000000277935  0.000000083548
 -0.000006124162 -0.000002906400 -0.000000803848  0.000000790469 -0.000000237498
 -0.000435217139 -0.000156751209 -0.000074410563  0.000034750029 -0.000013651649
 -0.000549306643 -0.000204570127 -0.000091790111  0.000046729903 -0.000017744174
 -0.001441942689 -0.000517361908 -0.000248428130  0.000114031346 -0.000044864406
 -0.002949316455 -0.001098578281 -0.000496898983  0.000250352985 -0.000096595346
 -0.006078935114 -0.002205084416 -0.001053581935  0.000487708277 -0.000186081025
 -0.012256686703 -0.004582622752 -0.002112241640  0.001041560085 -0.000431191858
 -0.024708815836 -0.009244142731 -0.004348013478  0.002081469291 -0.000819998617
 -0.049923997534 -0.019270619328 -0.009016410185  0.004374510843 -0.001760310014
 -0.098211941412 -0.039062692122 -0.018504945385  0.008935437502 -0.003571619427
 -0.183913821212 -0.079391098271 -0.037793029962  0.018386419048 -0.007374301165
 -0.300782319986 -0.145613434784 -0.071502769624  0.034783136636 -0.013957886739
 -0.332966983932 -0.208310093297 -0.105196016523  0.052094020992 -0.020952781686
 -0.168505109603 -0.063679864920 -0.032250357389  0.015088150818 -0.006080701746
 -0.017800799216  0.467368691863  0.377383905444 -0.204696352152  0.084334783159
  0.001668700836  0.590639746387  0.631709397967 -0.383199109430  0.161456651739
 -0.000715656459  0.114502713109 -0.384666505865  0.363062947352 -0.167699886572
  0.000473253809 -0.019746845495 -0.868150782142  1.035882512423 -0.517151619109
 -0.000214967153  0.006844522388 -0.127120727534 -0.579601116541  0.433887465639
  0.000102213886 -0.003318881721  0.018832355578 -0.875614516123  0.807601504208
 -0.000033458304  0.001031954297 -0.004755325745 -0.053287984270 -0.826745385045
  0.000016841351 -0.000496056402  0.002259008214  0.012107511279 -0.559217854900
 -0.000004408654  0.000130103340 -0.000559480653 -0.002144582738  0.024143068559
  0.000002074633 -0.000062746576  0.000268425375  0.001024649933 -0.006006282231
   23    4    6    6    6    6
  574.8104215      125.1264969      23.78195368      2.230075183    
  52333798.00      7457206.100      1537804.900      390727.4400    
  115481.0800      38572.56500      14259.32800      5740.057900    
  2485.689700      1142.939700      552.5390700      278.4783300    
  145.2934300      77.64929200      41.84725100      22.92884100    
  12.59823000      6.688665500      3.491903600      1.767864000    
 0.8198290700     0.3700942400     0.1528582100    
 -0.000000177490  0.000000031598  0.000000099417  0.000000074416
  0.000020641806 -0.000009942551 -0.000005091957  0.000001241168
  0.000052559626 -0.000026792937 -0.000011488375  0.000005516016
  0.000151466059 -0.000073142931 -0.000037409450  0.000008671150
  0.000409760340 -0.000204713728 -0.000095357856  0.000039083106
  0.001125042271 -0.000558930233 -0.000267423669  0.000095326689
  0.003136005926 -0.001568157958 -0.000746145468  0.000277020968
  0.008836116721 -0.004449030829 -0.002123528331  0.000777360358
  0.024515438195 -0.012492562987 -0.005977725259  0.002209522035
  0.064185177502 -0.033434671708 -0.016072732671  0.005897354454
  0.146819581903 -0.079219692783 -0.038411763077  0.014249872766
  0.267305950019 -0.151635073287 -0.074363844556  0.027324038508
  0.340899121642 -0.200214760596 -0.099249497628  0.037280664937
  0.250435817667 -0.085510795271 -0.031509411702  0.009700331186
  0.080737093007  0.251508123063  0.181017916989 -0.069723961997
  0.006472714933  0.511679888976  0.404944176146 -0.170480105290
  0.000694121368  0.318539543857  0.163872384504 -0.045110749257
 -0.000389729083  0.059700991644 -0.452531967082  0.231622009456
  0.000094569851  0.001876903246 -0.587203002067  0.387617546956
 -0.000075434598  0.000676716559 -0.186147188505 -0.041612388358
  0.000030015531 -0.000181449165 -0.009794324671 -0.546306957440
 -0.000011354948  0.000071720260 -0.001300977340 -0.561377803112
  0.000002819031 -0.000025102451  0.000595579120 -0.005883320815
   15    2   10   10
  95.18678135      12.90320727    
  15348.02100      3986.640900      1420.554500      596.1714200    
  277.4859300      137.6827300      71.29713900      37.81903000    
  20.48249200      11.12734000      5.995980300      3.217691700    
  1.711660200     0.8791102800     0.3777227300    
 -0.000058682958  0.000028012578
 -0.000431864066  0.000207261013
 -0.002436378772  0.001168808456
 -0.011036449904  0.005344434542
 -0.039436610697  0.019209957115
 -0.110946597314  0.055165680240
 -0.233918649979  0.116750402033
 -0.345464312037  0.167465479899
 -0.313355706015  0.104610237687
 -0.140632045844 -0.155337877983
 -0.024252287691 -0.402877193850
 -0.001567164522 -0.389271910741
 -0.000147435190 -0.179486586743
 -0.000063645531 -0.036793553763
 -0.000005298992 -0.001869524622
   10    1    7
 0.3624243290    
  382.8597600      131.3957200      56.15113300      26.28916300    
  12.95412800      6.457282400      3.144453700      1.460998500    
 0.6271388300     0.2344312600    
  0.000667259444
  0.005785115172
  0.027449405099
  0.084073571410
  0.186075330388
  0.287348793145
  0.329197137542
  0.282350076748
  0.177678621367
  0.058183695830
*
Spectral Representation Operator
Core primitive basis
Exchange
End of Spectral Representation Operator
 

/Ga.ECP.Seijo.0s.0s.0e-AIMP-Tb3Ga5O12-Ga(oct).      
Embedding AIMP of Gao(3+) in Tb3Ga5O12
made Tue.Feb.21.12:42:26.CET.2012
   3.000    0
    0    0
*
* External AIMP: 
* Local Pot. Param. : (ECP convention)
*                      A(AIMP)=-Zeff*A(ECP)
*
M1
   13
  401250.0000      66735.00000      16619.00000      4852.800000    
  1600.600000      575.1700000      202.8500000      77.26300000    
  34.97900000      10.45440000      4.812500000      2.122300000    
 0.8752300000    
 0.7128350476E-01 0.8042886088E-01 0.1434697669     0.2469407024    
 0.4004442802     0.5286866865     0.6372948046      1.244798794    
  1.165468692      1.220918735      2.303635384      1.123829923    
 0.1661331978    
M2
    0
COREREP
   1.000
PROJOP
    2
   20    3    2    2    2
  755.8980787      95.92330281      12.49426825    
  70959040.00      7603324.000      1319240.000      302670.5000    
  83251.81000      25933.12000      8976.547000      3372.096000    
  1348.620000      567.5549000      248.1887000      111.6749000    
  49.24165000      23.27517000      11.08148000      4.899352000    
  2.300821000      1.026582000     0.2092229000     0.7348584000E-01
  0.000013491980 -0.000004279719 -0.000001668549
  0.000131163491 -0.000043088996 -0.000017183953
  0.000530468706 -0.000171733452 -0.000067799902
 -0.000311934836  0.000104662074  0.000042495286
  0.001402143056 -0.000441489646 -0.000170369999
  0.003678575032 -0.001145092808 -0.000435725392
  0.013499437701 -0.004243408145 -0.001623434903
  0.040090971707 -0.012868185698 -0.004925001024
  0.106443053705 -0.035723009852 -0.013775939982
  0.232114791513 -0.086622561285 -0.033771567830
  0.364365314334 -0.169076453357 -0.068064595484
  0.307543432583 -0.210080115389 -0.089024961203
  0.080427364544  0.026400127746  0.011710783570
 -0.002091235227  0.532883020235  0.332527213436
  0.003317557084  0.503043451840  0.468889169644
 -0.001365715689  0.088564130903 -0.175195565158
  0.000409341719 -0.001343974591 -0.723868115704
 -0.000327460956  0.002365787862 -0.378434610684
  0.000091024774 -0.000346964386 -0.010686404203
  0.000007768461 -0.000089590241  0.007726273044
   15    2    6    6
  84.74853912      8.715688720    
  49597.56000      8521.695000      2303.899000      783.0395000    
  305.5494000      131.1653000      60.06042000      28.47848000    
  13.71275000      6.359916000      2.903849000      1.270245000    
 0.4810799000     0.1528591000     0.4856343000E-01
  0.000016436632  0.000006204517
  0.000246401987  0.000093678025
  0.001889019766  0.000716035075
  0.009964960527  0.003823136395
  0.039612398682  0.015359012457
  0.119508365514  0.048147325755
  0.263337683659  0.110431697678
  0.386816622458  0.174961681043
  0.293028761823  0.095727381821
  0.071902265338 -0.247996645726
  0.001984555884 -0.516954632291
  0.001435109265 -0.353094164204
 -0.000188515595 -0.049218740451
  0.000059340106  0.008978110680
 -0.000025855757 -0.000686794925
    9    1   10
  2.139216285    
  457.9123000      128.5433000      48.13583000      20.16190000    
  9.037338000      4.122069000      1.835645000     0.7793226000    
 0.2999676000    
  0.000572534389
  0.005775196555
  0.029829392778
  0.099755176800
  0.223358897688
  0.333130341582
  0.345805816805
  0.242789538451
  0.052126931136
*
Spectral Representation Operator
Core primitive basis
Exchange
End of Spectral Representation Operator
 

/Ga.ECP.Seijo.0s.0s.0e-AIMP-Tb3Ga5O12-Ga(tet).      
Embedding AIMP of Gat(3+) in Tb3Ga5O12
made Tue.Feb.21.12:53:52.CET.2012
   3.000    0
    0    0
*
* External AIMP: 
* Local Pot. Param. : (ECP convention)
*                      A(AIMP)=-Zeff*A(ECP)
*
M1
   13
  400800.0000      66646.00000      16583.00000      4841.100000    
  1596.900000      573.7200000      202.2800000      77.09100000    
  34.89800000      10.40820000      4.789600000      2.106100000    
 0.8584400000    
 0.7132265984E-01 0.8051466944E-01 0.1437080680     0.2472326022    
 0.4008966052     0.5289993246     0.6380354932      1.246794681    
  1.163057121      1.231100856      2.304872297      1.115129988    
 0.1616689678    
M2
    0
COREREP
   1.000
PROJOP
    2
   20    3    2    2    2
  756.0485914      96.07441091      12.63853061    
  70959040.00      7603324.000      1319240.000      302670.5000    
  83251.81000      25933.12000      8976.547000      3372.096000    
  1348.620000      567.5549000      248.1887000      111.6749000    
  49.24165000      23.27517000      11.08148000      4.899352000    
  2.300821000      1.026582000     0.2092229000     0.7348584000E-01
  0.000013491979 -0.000004279736 -0.000001668827
  0.000131163478 -0.000043089139 -0.000017188149
  0.000530468657 -0.000171734101 -0.000067813223
 -0.000311934851  0.000104662418  0.000042499469
  0.001402142657 -0.000441493011 -0.000170403903
  0.003678574200 -0.001145095549 -0.000435898917
  0.013499432331 -0.004243452759 -0.001623701517
  0.040090963659 -0.012868196739 -0.004927106590
  0.106442999820 -0.035723454757 -0.013777497536
  0.232114739988 -0.086622384201 -0.033788492649
  0.364364981508 -0.169079373508 -0.068063589364
  0.307543639075 -0.210076510999 -0.089104313244
  0.080427432988  0.026385202529  0.011854837349
 -0.002090356197  0.532920398155  0.332301430370
  0.003316198104  0.503002845073  0.469761197983
 -0.001363869805  0.088629280353 -0.176772072927
  0.000406990892 -0.001454637538 -0.722090974075
 -0.000325546365  0.002459796679 -0.380396086923
  0.000089608200 -0.000422348432 -0.008381007385
  0.000008127870 -0.000070622937  0.007056156098
   15    2    6    6
  84.89960165      8.860756063    
  49597.56000      8521.695000      2303.899000      783.0395000    
  305.5494000      131.1653000      60.06042000      28.47848000    
  13.71275000      6.359916000      2.903849000      1.270245000    
 0.4810799000     0.1528591000     0.4856343000E-01
 -0.000016436677 -0.000006206639
 -0.000246403512 -0.000093687993
 -0.001889025617 -0.000716261141
 -0.009965018335 -0.003823596833
 -0.039612507167 -0.015363870486
 -0.119509004611 -0.048152577484
 -0.263338194232 -0.110472205988
 -0.386823029191 -0.174964015174
 -0.293027782548 -0.095834751572
 -0.071896696604  0.248306348501
 -0.001974064568  0.516803287862
 -0.001441696019  0.353327555435
  0.000194461334  0.048737950432
 -0.000059089244 -0.008978424726
  0.000025124098  0.000912924603
    9    1   10
  2.285357008    
  457.9123000      128.5433000      48.13583000      20.16190000    
  9.037338000      4.122069000      1.835645000     0.7793226000    
 0.2999676000    
  0.000572536489
  0.005773409981
  0.029828187177
  0.099724864704
  0.223371168969
  0.332956596746
  0.345843964387
  0.241675375592
  0.054619819139
*
Spectral Representation Operator
Core primitive basis
Exchange
End of Spectral Representation Operator
 

/Ga.ECP.Seijo.20s15p9d.1s1p1d.0e-AIMP-Tb3Ga5O12-Ga(tet).      
Embedding AIMP of Gat(3+) in Tb3Ga5O12 with orthogonality functions
made Tue.Feb.21.12:53:52.CET.2012
   3.000    2
   20    1
  70959040.00      7603324.000      1319240.000      302670.5000    
  83251.81000      25933.12000      8976.547000      3372.096000    
  1348.620000      567.5549000      248.1887000      111.6749000    
  49.24165000      23.27517000      11.08148000      4.899352000    
  2.300821000      1.026582000     0.2092229000     0.7348584000E-01
  -0.000001668827
  -0.000017188149
  -0.000067813223
   0.000042499469
  -0.000170403903
  -0.000435898917
  -0.001623701517
  -0.004927106590
  -0.013777497536
  -0.033788492649
  -0.068063589364
  -0.089104313244
   0.011854837349
   0.332301430370
   0.469761197983
  -0.176772072927
  -0.722090974075
  -0.380396086923
  -0.008381007385
   0.007056156098
   15    1
  49597.56000      8521.695000      2303.899000      783.0395000    
  305.5494000      131.1653000      60.06042000      28.47848000    
  13.71275000      6.359916000      2.903849000      1.270245000    
 0.4810799000     0.1528591000     0.4856343000E-01
  -0.000006206639
  -0.000093687993
  -0.000716261141
  -0.003823596833
  -0.015363870486
  -0.048152577484
  -0.110472205988
  -0.174964015174
  -0.095834751572
   0.248306348501
   0.516803287862
   0.353327555435
   0.048737950432
  -0.008978424726
   0.000912924603
    9    1
  457.9123000      128.5433000      48.13583000      20.16190000    
  9.037338000      4.122069000      1.835645000     0.7793226000    
 0.2999676000    
  0.000572536489
  0.005773409981
  0.029828187177
  0.099724864704
  0.223371168969
  0.332956596746
  0.345843964387
  0.241675375592
  0.054619819139
*
* External AIMP: 
* Local Pot. Param. : (ECP convention)
*                      A(AIMP)=-Zeff*A(ECP)
*
M1
   13
  400800.0000      66646.00000      16583.00000      4841.100000    
  1596.900000      573.7200000      202.2800000      77.09100000    
  34.89800000      10.40820000      4.789600000      2.106100000    
 0.8584400000    
 0.7132265984E-01 0.8051466944E-01 0.1437080680     0.2472326022    
 0.4008966052     0.5289993246     0.6380354932      1.246794681    
  1.163057121      1.231100856      2.304872297      1.115129988    
 0.1616689678    
M2
    0
COREREP
   1.000
PROJOP
    2
   20    3    2    2    2
  756.0485914      96.07441091      12.63853061    
  70959040.00      7603324.000      1319240.000      302670.5000    
  83251.81000      25933.12000      8976.547000      3372.096000    
  1348.620000      567.5549000      248.1887000      111.6749000    
  49.24165000      23.27517000      11.08148000      4.899352000    
  2.300821000      1.026582000     0.2092229000     0.7348584000E-01
  0.000013491979 -0.000004279736 -0.000001668827
  0.000131163478 -0.000043089139 -0.000017188149
  0.000530468657 -0.000171734101 -0.000067813223
 -0.000311934851  0.000104662418  0.000042499469
  0.001402142657 -0.000441493011 -0.000170403903
  0.003678574200 -0.001145095549 -0.000435898917
  0.013499432331 -0.004243452759 -0.001623701517
  0.040090963659 -0.012868196739 -0.004927106590
  0.106442999820 -0.035723454757 -0.013777497536
  0.232114739988 -0.086622384201 -0.033788492649
  0.364364981508 -0.169079373508 -0.068063589364
  0.307543639075 -0.210076510999 -0.089104313244
  0.080427432988  0.026385202529  0.011854837349
 -0.002090356197  0.532920398155  0.332301430370
  0.003316198104  0.503002845073  0.469761197983
 -0.001363869805  0.088629280353 -0.176772072927
  0.000406990892 -0.001454637538 -0.722090974075
 -0.000325546365  0.002459796679 -0.380396086923
  0.000089608200 -0.000422348432 -0.008381007385
  0.000008127870 -0.000070622937  0.007056156098
   15    2    6    6
  84.89960165      8.860756063    
  49597.56000      8521.695000      2303.899000      783.0395000    
  305.5494000      131.1653000      60.06042000      28.47848000    
  13.71275000      6.359916000      2.903849000      1.270245000    
 0.4810799000     0.1528591000     0.4856343000E-01
 -0.000016436677 -0.000006206639
 -0.000246403512 -0.000093687993
 -0.001889025617 -0.000716261141
 -0.009965018335 -0.003823596833
 -0.039612507167 -0.015363870486
 -0.119509004611 -0.048152577484
 -0.263338194232 -0.110472205988
 -0.386823029191 -0.174964015174
 -0.293027782548 -0.095834751572
 -0.071896696604  0.248306348501
 -0.001974064568  0.516803287862
 -0.001441696019  0.353327555435
  0.000194461334  0.048737950432
 -0.000059089244 -0.008978424726
  0.000025124098  0.000912924603
    9    1   10
  2.285357008    
  457.9123000      128.5433000      48.13583000      20.16190000    
  9.037338000      4.122069000      1.835645000     0.7793226000    
 0.2999676000    
  0.000572536489
  0.005773409981
  0.029828187177
  0.099724864704
  0.223371168969
  0.332956596746
  0.345843964387
  0.241675375592
  0.054619819139
*
Spectral Representation Operator
Core primitive basis
Exchange
End of Spectral Representation Operator
 

/O.ECP.Seijo.0s.0s.0e-AIMP-Tb3Ga5O12-O.         
Embedding AIMP of O(2-) in Tb3Ga5O12
made Tue.Feb.21.13:04:06.CET.2012
  -2.000    0
    0    0
*
* External AIMP: 
* Local Pot. Param. : (ECP convention)
*                      A(AIMP)=-Zeff*A(ECP)
*
M1
   12
  282885.8300      34740.01200      6502.573000      1486.426000    
  406.8273300      124.8370000      41.98461900      13.81633000    
  4.272136000      1.610321600     0.6078900000     0.2644720000    
 -.2175875463E-01 -.3179373708E-01 -.6529225933E-01 -.1218062138    
 -.2183649759     -.3838920962     -.5099817698     -.4588702238    
 -.7579693477     -1.297892700     -1.062625549     -.6975237249E-01
M2
    0
COREREP
   1.000
PROJOP
    1
    8    2    2    2
  40.41854928      2.060518520    
  2048.050000      309.0990000      70.41410000      19.70120000    
  6.031450000      10.22970000     0.9340900000     0.2862500000    
  0.006202045737  0.001317354867
  0.045639299719  0.009586680182
  0.200056273322  0.046727874649
  0.473804131528  0.114325510386
  0.380731883279  0.097459504029
  0.028994087260  0.070033145558
  0.024639022713 -0.461663764618
 -0.005622247740 -0.642514454065
    6    1    6
 0.6018227928    
  34.97120000      7.845090000      2.303320000     0.7219800000    
 0.2155300000     0.5900000000E-01
 -0.013145683794
 -0.085183320183
 -0.249038290548
 -0.434584646450
 -0.513136598099
  0.092811926543
*
Spectral Representation Operator
Core primitive basis
Exchange
End of Spectral Representation Operator
 
 
********************************************************************************
*         E.7.X. Dy3Ga5O12 (DyGG)
********************************************************************************
*           E.7.X.a. Dy3Ga5O12
*             Structure:
*                    G.Patzke et al., Zeitschrift fur Kristallographie - NCS (1999)
*                    (Ia-3d; a=12.3060A, x=-0.0278, =0.0549, z=0.1499)
*             Embedding potentials:
*                    L.Seijo, Z.Barandiaran, to be published
*                    Out of SCEI DKH-HF calculations
*             /Dy.ECP.Seijo.0s.0s.0e-AIMP-Dy3Ga5O12-Dy.
*             /Ga.ECP.Seijo.0s.0s.0e-AIMP-Dy3Ga5O12-Ga(oct).
*             /Ga.ECP.Seijo.0s.0s.0e-AIMP-Dy3Ga5O12-Ga(tet).
*             /Ga.ECP.Seijo.20s15p9d.1s1p1d.0e-AIMP-Dy3Ga5O12-Ga(tet).
*             /O.ECP.Seijo.0s.0s.0e-AIMP-Dy3Ga5O12-O.
********************************************************************************
/Dy.ECP.Seijo.0s.0s.0e-AIMP-Dy3Ga5O12-Dy.       
Embedding AIMP of Dy(3+) in Dy3Ga5O12 
made Mon.Feb.20.20:01:46.CET.2012
   3.000    0
    0    0
*
* External AIMP: 
* Local Pot. Param. : (ECP convention)
*                      A(AIMP)=-Zeff*A(ECP)
*
M1
   15
  529970.0000      109337.0000      32514.00000      10844.10000    
  3930.800000      1462.680000      563.5500000      256.2300000    
  88.18300000      45.71400000      9.511500000      5.537000000    
  2.187380000      1.087230000     0.5877400000    
 0.1878887589     0.1745451939     0.2889431030     0.4519385576    
 0.6209037842     0.7808122217      1.380232869      1.680791819    
  1.572935518      3.941802483      3.643423930      2.731820126    
  1.537636402      1.661871528     0.3444537155    
M2
    0
COREREP
   1.000
PROJOP
    3
   27    5    2    2    2    2    2
  3967.903887      670.6279335      153.6219658      32.55915322    
  4.378530881    
 0.6721450200E+11  6077568400.      944890800.0      208295630.0    
  51192202.00      13811530.00      4113756.000      1317149.800    
  443336.6800      157879.9300      59337.89900      23240.25100    
  9486.996100      4034.540000      1767.046800      792.3410800    
  365.0806000      155.1894100      71.73039000      28.70488400    
  14.88283900      5.837997500      2.874954500     0.7956706500    
 0.3545239800     0.5759346300E-01 0.2381190100E-01
  0.000000044374  0.000000029329  0.000000003092 -0.000000008822  0.000000002524
 -0.000000222407 -0.000000147641 -0.000000015283  0.000000044473 -0.000000012730
  0.000000764056  0.000000527034  0.000000045769 -0.000000160630  0.000000045673
 -0.000000829637 -0.000001014087  0.000000100894  0.000000348935 -0.000000089137
 -0.000457257978 -0.000165474818 -0.000078659533  0.000036940124 -0.000014400290
 -0.000581606687 -0.000217247425 -0.000097969840  0.000049635881 -0.000018979518
 -0.001511529958 -0.000545119068 -0.000261996678  0.000121143390 -0.000047173813
 -0.003089119395 -0.001154774786 -0.000524446863  0.000263481133 -0.000102041449
 -0.006398525038 -0.002333281001 -0.001116104874  0.000520106280 -0.000197276025
 -0.012877171492 -0.004835269644 -0.002236007322  0.001101856925 -0.000453580914
 -0.025776631487 -0.009695388792 -0.004571550542  0.002194423683 -0.000860408030
 -0.051725456622 -0.020073273129 -0.009418357011  0.004576277934 -0.001832365754
 -0.101611778595 -0.040692465276 -0.019333851549  0.009355151505 -0.003720383862
 -0.188763947149 -0.082123915827 -0.039220917195  0.019115323622 -0.007629775261
 -0.303533674636 -0.148523043284 -0.073224751471  0.035701598056 -0.014252446098
 -0.328801756454 -0.207445226328 -0.105125598798  0.052169723230 -0.020888197446
 -0.160491131841 -0.052298950628 -0.025671270517  0.011747305264 -0.004684367204
 -0.016126218791  0.475041401698  0.387466337254 -0.211095024447  0.086533454547
  0.001319239126  0.581522950829  0.624308351877 -0.380254659767  0.159605114174
 -0.000531098990  0.111316816077 -0.403764793114  0.382833847747 -0.176513167925
  0.000360249148 -0.019501811008 -0.854751507646  1.028128416326 -0.510527155229
 -0.000161619485  0.006752789575 -0.123746981881 -0.580874722729  0.428291498061
  0.000073008430 -0.003180706616  0.016340803626 -0.881184206477  0.809616111238
 -0.000023617406  0.000976289207 -0.004106488633 -0.053863538558 -0.814892122108
  0.000011868214 -0.000461739686  0.001921893823  0.012109895646 -0.565833993948
 -0.000003030278  0.000118650335 -0.000464412238 -0.002181985374  0.017728849098
  0.000001417782 -0.000057605320  0.000224257884  0.001053529704 -0.003157554448
   23    4    6    6    6    6
  596.2596767      130.1796184      24.59116381      2.202644617    
  52440248.00      7469553.600      1541307.300      390397.5700    
  115424.5900      38636.40600      14258.54400      5741.160100    
  2486.072300      1142.916300      552.5360600      278.4018000    
  145.3220600      77.66635900      41.83035700      22.95891500    
  12.60513400      6.694293300      3.493472300      1.763260300    
 0.8196638100     0.3699807900     0.1525006900    
 -0.000000116957 -0.000000124523  0.000000032241 -0.000000086375
 -0.000022063090 -0.000010639817 -0.000005459987 -0.000001409793
 -0.000056253817 -0.000028868636 -0.000012403396 -0.000005655911
 -0.000162660105 -0.000078607261 -0.000040332286 -0.000010007060
 -0.000436662164 -0.000219107685 -0.000102218506 -0.000040988393
 -0.001198461172 -0.000597444929 -0.000286496736 -0.000101685023
 -0.003340248021 -0.001676757496 -0.000799396742 -0.000293904748
 -0.009364067658 -0.004733737517 -0.002264611473 -0.000822717516
 -0.025911538354 -0.013262942462 -0.006359793749 -0.002329478792
 -0.067420276933 -0.035297776557 -0.017012874241 -0.006194952821
 -0.152908140837 -0.082987324350 -0.040337184855 -0.014827712011
 -0.274338269483 -0.156627837781 -0.077066985900 -0.028116019049
 -0.340998296802 -0.200388847801 -0.099389752479 -0.036948643684
 -0.241213117020 -0.071032031893 -0.022861751408 -0.006452106411
 -0.072980106740  0.276456961018  0.199836981978  0.076953832664
 -0.005224480570  0.513433995498  0.409922055385  0.170550126469
 -0.000591974763  0.297013751054  0.126476901890  0.028290470488
  0.000349410633  0.050757394245 -0.483719980346 -0.247787267758
 -0.000076540576  0.001760632807 -0.567920365962 -0.372270576559
  0.000062233551  0.000482354068 -0.165487690010  0.069978113739
 -0.000024877435 -0.000110686259 -0.007715966153  0.557768840420
  0.000009306877  0.000043063635 -0.001225335715  0.531904596163
 -0.000002314012 -0.000015790632  0.000490318979  0.010042765830
   15    2   10   10
  99.26910084      13.33926123    
  15533.20600      4007.721300      1419.133800      595.8089300    
  277.5791000      137.6802900      71.30574300      37.81334200    
  20.47626000      11.12570000      5.986831100      3.216501000    
  1.714656200     0.8813605400     0.3769442600    
  0.000062688781  0.000030040471
  0.000467108330  0.000225001773
  0.002645831153  0.001274462454
  0.011855558860  0.005764700777
  0.042085504009  0.020594906043
  0.117247167148  0.058588982749
  0.242963586787  0.121676929376
  0.350767782252  0.169809567890
  0.304390406598  0.092559762551
  0.128711536686 -0.178422861664
  0.020646901435 -0.412113358598
  0.001302184259 -0.375388837434
  0.000170003965 -0.165562494714
  0.000058356783 -0.032423140347
  0.000006943817 -0.001662219585
   10    1    9
 0.4432099078    
  382.4941200      131.2397600      56.11926000      26.28078200    
  12.96401500      6.460345500      3.147103100      1.463683100    
 0.6296336200     0.2356707200    
  0.000754022807
  0.006488748956
  0.030276869979
  0.091368425067
  0.196790059399
  0.294793995763
  0.327518799939
  0.273027522285
  0.164659475083
  0.050310817171
*
Spectral Representation Operator
Core primitive basis
Exchange
End of Spectral Representation Operator
 

/Ga.ECP.Seijo.0s.0s.0e-AIMP-Dy3Ga5O12-Ga(oct).      
Embedding AIMP of Gao(3+) in Dy3Ga5O12 
made Mon.Feb.20.20:12:35.CET.2012
   3.000    0
    0    0
*
* External AIMP: 
* Local Pot. Param. : (ECP convention)
*                      A(AIMP)=-Zeff*A(ECP)
*
M1
   13
  400970.0000      66696.00000      16615.00000      4849.000000    
  1598.900000      574.5900000      202.6300000      77.19900000    
  34.94800000      10.43330000      4.799500000      2.111800000    
 0.8608800000    
 0.7131206821E-01 0.8041996350E-01 0.1435041105     0.2471683329    
 0.4006303238     0.5287481041     0.6375522070      1.245490144    
  1.164619491      1.226263631      2.305432409      1.119758557    
 0.1624339907    
M2
    0
COREREP
   1.000
PROJOP
    2
   20    3    2    2    2
  755.8818555      95.90689209      12.47687897    
  70959040.00      7603324.000      1319240.000      302670.5000    
  83251.81000      25933.12000      8976.547000      3372.096000    
  1348.620000      567.5549000      248.1887000      111.6749000    
  49.24165000      23.27517000      11.08148000      4.899352000    
  2.300821000      1.026582000     0.2092229000     0.7348584000E-01
  0.000013491980 -0.000004279725 -0.000001668300
  0.000131163490 -0.000043089083 -0.000017180385
  0.000530468703 -0.000171733725 -0.000067787616
 -0.000311934841  0.000104662152  0.000042484287
  0.001402143070 -0.000441489852 -0.000170361000
  0.003678574848 -0.001145097250 -0.000435677454
  0.013499438075 -0.004243405104 -0.001623478166
  0.040090969212 -0.012868244989 -0.004924293404
  0.106443058972 -0.035722945870 -0.013776824649
  0.232114768253 -0.086623093204 -0.033765092691
  0.364365349215 -0.169075680393 -0.068074946093
  0.307543322712 -0.210083189432 -0.088985485078
  0.080427650629  0.026406750548  0.011616062329
 -0.002091728217  0.532870401467  0.332737641377
  0.003318275311  0.503071964195  0.468431564548
 -0.001366752660  0.088515831427 -0.174358173063
  0.000410565819 -0.001287590323 -0.725259570486
 -0.000328392978  0.002317727415 -0.376796813542
  0.000091699857 -0.000309420662 -0.012051773265
  0.000007697636 -0.000093251779  0.007755319386
   15    2    6    6
  84.73212559      8.697087960    
  49597.56000      8521.695000      2303.899000      783.0395000    
  305.5494000      131.1653000      60.06042000      28.47848000    
  13.71275000      6.359916000      2.903849000      1.270245000    
 0.4810799000     0.1528591000     0.4856343000E-01
 -0.000016436678 -0.000006204665
 -0.000246402601 -0.000093676557
 -0.001889025019 -0.000716049103
 -0.009964985923 -0.003823086321
 -0.039612512350 -0.015359321939
 -0.119508677962 -0.048146645998
 -0.263338498056 -0.110435029332
 -0.386817957628 -0.174956366508
 -0.293029191530 -0.095741920607
 -0.071898977871  0.248054020100
 -0.001982550778  0.516913950169
 -0.001435729715  0.353102141553
  0.000191548070  0.048728740119
 -0.000068634383 -0.007543915243
  0.000029394915  0.000198145347
    9    1   10
  2.120101280    
  457.9123000      128.5433000      48.13583000      20.16190000    
  9.037338000      4.122069000      1.835645000     0.7793226000    
 0.2999676000    
 -0.000572794406
 -0.005773064953
 -0.029839603546
 -0.099717521021
 -0.223473135905
 -0.332841419335
 -0.346373089984
 -0.241183354830
 -0.054315746574
*
Spectral Representation Operator
Core primitive basis
Exchange
End of Spectral Representation Operator
 

/Ga.ECP.Seijo.0s.0s.0e-AIMP-Dy3Ga5O12-Ga(tet).      
Embedding AIMP of Gat(3+) in Dy3Ga5O12 
made Mon.Feb.20.20:23:38.CET.2012
   3.000    0
    0    0
*
* External AIMP: 
* Local Pot. Param. : (ECP convention)
*                      A(AIMP)=-Zeff*A(ECP)
*
M1
   13
  400980.0000      66618.00000      16574.00000      4836.000000    
  1594.300000      572.6700000      201.7600000      76.87700000    
  34.78900000      10.35360000      4.763200000      2.089900000    
 0.8431800000    
 0.7131955389E-01 0.8055338640E-01 0.1437593128     0.2475247250    
 0.4013025357     0.5292567542     0.6392989837      1.249911174    
  1.159891728      1.242828435      2.304682297      1.105364435    
 0.1576400124    
M2
    0
COREREP
   1.000
PROJOP
    2
   20    3    2    2    2
  756.0128935      96.03841748      12.60206357    
  70959040.00      7603324.000      1319240.000      302670.5000    
  83251.81000      25933.12000      8976.547000      3372.096000    
  1348.620000      567.5549000      248.1887000      111.6749000    
  49.24165000      23.27517000      11.08148000      4.899352000    
  2.300821000      1.026582000     0.2092229000     0.7348584000E-01
  0.000013491979 -0.000004279740 -0.000001668549
  0.000131163478 -0.000043089208 -0.000017184148
  0.000530468659 -0.000171734285 -0.000067799604
 -0.000311934858  0.000104662383  0.000042488611
  0.001402142697 -0.000441493064 -0.000170389147
  0.003678574048 -0.001145100494 -0.000435825773
  0.013499433070 -0.004243448031 -0.001623684782
  0.040090961428 -0.012868262850 -0.004926109985
  0.106443009035 -0.035723370589 -0.013777925583
  0.232114717799 -0.086622985994 -0.033779836570
  0.364365036857 -0.169078427056 -0.068072385556
  0.307543509879 -0.210080063898 -0.089056271512
  0.080427742327  0.026393117094  0.011748050864
 -0.002090951480  0.532905151721  0.332522763464
  0.003317064655  0.503036371627  0.469221769355
 -0.001365122082  0.088571469466 -0.175813701159
  0.000408492660 -0.001386037568 -0.723620404844
 -0.000326721445  0.002400010285 -0.378452696485
  0.000090640828 -0.000365477895 -0.010383600684
  0.000007838254 -0.000086206941  0.007504839923
   15    2    6    6
  84.86358722      8.822284623    
  49597.56000      8521.695000      2303.899000      783.0395000    
  305.5494000      131.1653000      60.06042000      28.47848000    
  13.71275000      6.359916000      2.903849000      1.270245000    
 0.4810799000     0.1528591000     0.4856343000E-01
 -0.000016436741 -0.000006206361
 -0.000246404249 -0.000093689576
 -0.001889032772 -0.000716234097
 -0.009965049406 -0.003823649436
 -0.039612663216 -0.015363307636
 -0.119509391610 -0.048153507708
 -0.263339341857 -0.110467212008
 -0.386824342507 -0.174973582415
 -0.293028711277 -0.095809487011
 -0.071891764023  0.248285262008
 -0.001973341992  0.516900634233
 -0.001440251469  0.353067742714
  0.000194952573  0.048625932944
 -0.000066531098 -0.007838686288
  0.000028246957  0.000472297047
    9    1   10
  2.246397021    
  457.9123000      128.5433000      48.13583000      20.16190000    
  9.037338000      4.122069000      1.835645000     0.7793226000    
 0.2999676000    
  0.000572658535
  0.005771180283
  0.029832148310
  0.099685943518
  0.223429011582
  0.332702604797
  0.346198066599
  0.240327546351
  0.056874604182
*
Spectral Representation Operator
Core primitive basis
Exchange
End of Spectral Representation Operator
 

/Ga.ECP.Seijo.20s15p9d.1s1p1d.0e-AIMP-Dy3Ga5O12-Ga(tet).      
Embedding AIMP of Gat(3+) in Dy3Ga5O12 with orthogonality orbitals
made Mon.Feb.20.20:23:38.CET.2012
   3.000    2
   20    1
  70959040.00      7603324.000      1319240.000      302670.5000    
  83251.81000      25933.12000      8976.547000      3372.096000    
  1348.620000      567.5549000      248.1887000      111.6749000    
  49.24165000      23.27517000      11.08148000      4.899352000    
  2.300821000      1.026582000     0.2092229000     0.7348584000E-01
  -0.000001668549
  -0.000017184148
  -0.000067799604
   0.000042488611
  -0.000170389147
  -0.000435825773
  -0.001623684782
  -0.004926109985
  -0.013777925583
  -0.033779836570
  -0.068072385556
  -0.089056271512
   0.011748050864
   0.332522763464
   0.469221769355
  -0.175813701159
  -0.723620404844
  -0.378452696485
  -0.010383600684
   0.007504839923
   15    1
  49597.56000      8521.695000      2303.899000      783.0395000    
  305.5494000      131.1653000      60.06042000      28.47848000    
  13.71275000      6.359916000      2.903849000      1.270245000    
 0.4810799000     0.1528591000     0.4856343000E-01
  -0.000006206361
  -0.000093689576
  -0.000716234097
  -0.003823649436
  -0.015363307636
  -0.048153507708
  -0.110467212008
  -0.174973582415
  -0.095809487011
   0.248285262008
   0.516900634233
   0.353067742714
   0.048625932944
  -0.007838686288
   0.000472297047
    9    1
  457.9123000      128.5433000      48.13583000      20.16190000    
  9.037338000      4.122069000      1.835645000     0.7793226000    
 0.2999676000    
  0.000572658535
  0.005771180283
  0.029832148310
  0.099685943518
  0.223429011582
  0.332702604797
  0.346198066599
  0.240327546351
  0.056874604182
*
* External AIMP: 
* Local Pot. Param. : (ECP convention)
*                      A(AIMP)=-Zeff*A(ECP)
*
M1
   13
  400980.0000      66618.00000      16574.00000      4836.000000    
  1594.300000      572.6700000      201.7600000      76.87700000    
  34.78900000      10.35360000      4.763200000      2.089900000    
 0.8431800000    
 0.7131955389E-01 0.8055338640E-01 0.1437593128     0.2475247250    
 0.4013025357     0.5292567542     0.6392989837      1.249911174    
  1.159891728      1.242828435      2.304682297      1.105364435    
 0.1576400124    
M2
    0
COREREP
   1.000
PROJOP
    2
   20    3    2    2    2
  756.0128935      96.03841748      12.60206357    
  70959040.00      7603324.000      1319240.000      302670.5000    
  83251.81000      25933.12000      8976.547000      3372.096000    
  1348.620000      567.5549000      248.1887000      111.6749000    
  49.24165000      23.27517000      11.08148000      4.899352000    
  2.300821000      1.026582000     0.2092229000     0.7348584000E-01
  0.000013491979 -0.000004279740 -0.000001668549
  0.000131163478 -0.000043089208 -0.000017184148
  0.000530468659 -0.000171734285 -0.000067799604
 -0.000311934858  0.000104662383  0.000042488611
  0.001402142697 -0.000441493064 -0.000170389147
  0.003678574048 -0.001145100494 -0.000435825773
  0.013499433070 -0.004243448031 -0.001623684782
  0.040090961428 -0.012868262850 -0.004926109985
  0.106443009035 -0.035723370589 -0.013777925583
  0.232114717799 -0.086622985994 -0.033779836570
  0.364365036857 -0.169078427056 -0.068072385556
  0.307543509879 -0.210080063898 -0.089056271512
  0.080427742327  0.026393117094  0.011748050864
 -0.002090951480  0.532905151721  0.332522763464
  0.003317064655  0.503036371627  0.469221769355
 -0.001365122082  0.088571469466 -0.175813701159
  0.000408492660 -0.001386037568 -0.723620404844
 -0.000326721445  0.002400010285 -0.378452696485
  0.000090640828 -0.000365477895 -0.010383600684
  0.000007838254 -0.000086206941  0.007504839923
   15    2    6    6
  84.86358722      8.822284623    
  49597.56000      8521.695000      2303.899000      783.0395000    
  305.5494000      131.1653000      60.06042000      28.47848000    
  13.71275000      6.359916000      2.903849000      1.270245000    
 0.4810799000     0.1528591000     0.4856343000E-01
 -0.000016436741 -0.000006206361
 -0.000246404249 -0.000093689576
 -0.001889032772 -0.000716234097
 -0.009965049406 -0.003823649436
 -0.039612663216 -0.015363307636
 -0.119509391610 -0.048153507708
 -0.263339341857 -0.110467212008
 -0.386824342507 -0.174973582415
 -0.293028711277 -0.095809487011
 -0.071891764023  0.248285262008
 -0.001973341992  0.516900634233
 -0.001440251469  0.353067742714
  0.000194952573  0.048625932944
 -0.000066531098 -0.007838686288
  0.000028246957  0.000472297047
    9    1   10
  2.246397021    
  457.9123000      128.5433000      48.13583000      20.16190000    
  9.037338000      4.122069000      1.835645000     0.7793226000    
 0.2999676000    
  0.000572658535
  0.005771180283
  0.029832148310
  0.099685943518
  0.223429011582
  0.332702604797
  0.346198066599
  0.240327546351
  0.056874604182
*
Spectral Representation Operator
Core primitive basis
Exchange
End of Spectral Representation Operator
 

/O.ECP.Seijo.0s.0s.0e-AIMP-Dy3Ga5O12-O.         
Embedding AIMP of O(2-) in Dy3Ga5O12 
made Mon.Feb.20.20:33:26.CET.2012
  -2.000    0
    0    0
*
* External AIMP: 
* Local Pot. Param. : (ECP convention)
*                      A(AIMP)=-Zeff*A(ECP)
*
M1
   12
  282885.8300      34740.01200      6502.573000      1486.426000    
  406.8273300      124.8370000      41.98461900      13.81633000    
  4.272136000      1.610321600     0.6078900000     0.2644720000    
 -.2175991953E-01 -.3179457057E-01 -.6529700774E-01 -.1218079033    
 -.2183823296     -.3838963635     -.5100260697     -.4588352862    
 -.7581128743     -1.298334144     -1.062021195     -.6973233635E-01
M2
    0
COREREP
   1.000
PROJOP
    1
    8    2    2    2
  40.33542970      1.977279864    
  2048.050000      309.0990000      70.41410000      19.70120000    
  6.031450000      10.22970000     0.9340900000     0.2862500000    
  0.006202040825  0.001317898326
  0.045639197574  0.009592499032
  0.200056202943  0.046740811012
  0.473800695735  0.114478203709
  0.380723987840  0.097849442735
  0.029002092714  0.069755439042
  0.024650835564 -0.462653205440
 -0.005633002236 -0.641677962050
    6    1    6
 0.5191874392    
  34.97120000      7.845090000      2.303320000     0.7219800000    
 0.2155300000     0.5900000000E-01
 -0.013143884027
 -0.085175592256
 -0.248995617223
 -0.434712631186
 -0.512966603992
  0.092657325091
*
Spectral Representation Operator
Core primitive basis
Exchange
End of Spectral Representation Operator
 
 
********************************************************************************
*         E.7.X. Ho3Ga5O12 (HoGG)
********************************************************************************
*           E.7.X.a. Ho3Ga5O12
*             Structure:
*                    G.Patzke et al., Zeitschrift fur Kristallographie - NCS (1999)
*                    (Ia-3d; a=12.3060A, x=-0.0278, =0.0549, z=0.1499)
*             Embedding potentials:
*                    L.Seijo, Z.Barandiaran, to be published
*                    Out of SCEI DKH-HF calculations
*             /Ho.ECP.Seijo.0s.0s.0e-AIMP-Ho3Ga5O12-Ho.
*             /Ga.ECP.Seijo.0s.0s.0e-AIMP-Ho3Ga5O12-Ga(oct).
*             /Ga.ECP.Seijo.0s.0s.0e-AIMP-Ho3Ga5O12-Ga(tet).
*             /Ga.ECP.Seijo.20s15p9d.1s1p1d.0e-AIMP-Ho3Ga5O12-Ga(tet).
*             /O.ECP.Seijo.0s.0s.0e-AIMP-Ho3Ga5O12-O.
********************************************************************************
/Ho.ECP.Seijo.0s.0s.0e-AIMP-Ho3Ga5O12-Ho.       
Embedding AIMP of Ho(3+) in Ho3Ga5O12 
made Mon.Feb.20.15:32:38.CET.2012
   3.000    0
    0    0
*
* External AIMP: 
* Local Pot. Param. : (ECP convention)
*                      A(AIMP)=-Zeff*A(ECP)
*
M1
   15
  528770.0000      108909.0000      32404.00000      10844.20000    
  3932.200000      1455.230000      563.8900000      258.4300000    
  88.75200000      47.07500000      9.887400000      5.623800000    
  2.196380000      1.098730000     0.6058500000    
 0.1929013560     0.1794259097     0.2959132026     0.4600609748    
 0.6314036651     0.8008001435      1.420073610      1.648804920    
  1.652997769      3.873689665      3.811566853      2.804669957    
  1.629575542      1.594370533     0.3370792369    
M2
    0
COREREP
   1.000
PROJOP
    3
   27    5    2    2    2    2    2
  4102.677065      696.2915348      159.9325047      33.84012515    
  4.548668386    
 0.5787652300E+11  6285011100.      1045296700.      209451370.0    
  51656671.00      14119209.00      4152460.100      1324709.400    
  448022.7400      159208.7600      59306.91700      23231.07700    
  9504.675600      4033.387900      1768.484700      797.5870000    
  369.7310800      159.0650100      73.77257900      29.69960500    
  15.39441300      6.053188000      2.975108800     0.8191590500    
 0.3638196000     0.5985895400E-01 0.2468695600E-01
  0.000000082394  0.000000044358  0.000000007919 -0.000000013025  0.000000002711
 -0.000000374547 -0.000000201912 -0.000000035883  0.000000059332 -0.000000012351
  0.000001208992  0.000000659204  0.000000112572 -0.000000194801  0.000000040116
 -0.000002473607 -0.000001552097 -0.000000140883  0.000000487886 -0.000000084846
 -0.000480319358 -0.000174778722 -0.000083282277  0.000039149461 -0.000015379663
 -0.000606519277 -0.000227023068 -0.000102640313  0.000052173647 -0.000019566624
 -0.001606626067 -0.000583247790 -0.000280783990  0.000130045938 -0.000051349178
 -0.003236594957 -0.001213112121 -0.000552264506  0.000278324682 -0.000105968141
 -0.006662374832 -0.002444076566 -0.001172026812  0.000546724318 -0.000210249477
 -0.013543924493 -0.005104877627 -0.002367103605  0.001168103350 -0.000474087127
 -0.027132027627 -0.010263900788 -0.004851699166  0.002332911098 -0.000914500813
 -0.053680867709 -0.020945739289 -0.009854006252  0.004796359985 -0.001909264249
 -0.105170643615 -0.042421450108 -0.020214796488  0.009796814523 -0.003880887831
 -0.194397405344 -0.085260155546 -0.040848192690  0.019948571266 -0.007924444273
 -0.305827725452 -0.151390990610 -0.074951789761  0.036601754532 -0.014551037436
 -0.322666582052 -0.205127755749 -0.104262721787  0.051893225219 -0.020677077614
 -0.153184658439 -0.041918048788 -0.019619560078  0.008543553409 -0.003392282713
 -0.014844839784  0.480806978869  0.395746279791 -0.216181361140  0.088300909683
  0.001047305057  0.574093492159  0.618409861067 -0.378676759347  0.158204043974
 -0.000382941137  0.108012108101 -0.418315843028  0.400433951049 -0.183689234163
  0.000264180603 -0.018438255729 -0.846728351137  1.019062695916 -0.504399650401
 -0.000116269814  0.006313057384 -0.120850913492 -0.597265317160  0.439299185221
  0.000050362925 -0.002950713289  0.015787391224 -0.869807498378  0.792708414603
 -0.000016199043  0.000900534414 -0.003970769499 -0.052565153630 -0.817134641958
  0.000008338324 -0.000427031448  0.001865910533  0.011964648198 -0.560138232006
 -0.000002137836  0.000110935276 -0.000455424837 -0.002169294253  0.019548965880
  0.000000976871 -0.000053618860  0.000219032320  0.001044465267 -0.004001291394
   23    4    6    6    6    6
  618.2521140      135.4510387      25.53473153      2.301567057    
  51644258.00      7576760.900      1540884.600      388722.8400    
  115737.2300      38629.09800      14264.85400      5741.046300    
  2486.429700      1142.912800      552.5251800      278.3524300    
  145.2915300      77.67004500      41.83299000      22.97430800    
  12.58357400      6.700012400      3.499661900      1.764171900    
 0.8189240500     0.3697583900     0.1526556400    
  0.000000411188 -0.000000277020  0.000000035567 -0.000000098837
  0.000023376089 -0.000011309774  0.000005799070 -0.000001568715
  0.000061100548 -0.000031432630  0.000013621321 -0.000005858535
  0.000173139865 -0.000083953104  0.000043071083 -0.000011243683
  0.000465103588 -0.000234184706  0.000109507792 -0.000042955150
  0.001278843707 -0.000639778017  0.000307342166 -0.000108408109
  0.003547593380 -0.001787434200  0.000853711880 -0.000310496320
  0.009927805404 -0.005038493470  0.002415490290 -0.000869320816
  0.027342284892 -0.014055943578  0.006752740393 -0.002448579078
  0.070774925326 -0.037239392633  0.017993102967 -0.006489840752
  0.159004197997 -0.086786231189  0.042275559819 -0.015385566609
  0.281271013339 -0.161598811981  0.079767966427 -0.028830271909
  0.340683402355 -0.200017207442  0.099165393905 -0.036483824406
  0.231474135531 -0.055599942925  0.013631406776 -0.002909587318
  0.065843729095  0.300862812208 -0.218871289761  0.083801245005
  0.004173436495  0.513902650838 -0.412671985758  0.169870180667
  0.000522412758  0.275206453832 -0.087171835357  0.009845879700
 -0.000329235610  0.042404465161  0.510406902788 -0.259390850741
  0.000071336991  0.001892368790  0.546417816444 -0.357616987425
 -0.000055951763  0.000239746076  0.147974434988  0.099526436651
  0.000022529304 -0.000018763365  0.006239843879  0.560973900316
 -0.000008404158  0.000008504899  0.001189224986  0.514996084990
  0.000002066101 -0.000007580878 -0.000520238198  0.004803774609
   15    2   10   10
  103.5433297      13.90224670    
  16015.42300      4009.432500      1416.751000      596.0113300    
  277.5437200      137.6970000      71.30913800      37.80807700    
  20.47839900      11.11284800      5.982255800      3.215684600    
  1.713187900     0.8830239900     0.3775287000    
  0.000066369706  0.000031910917
  0.000510500993  0.000246766259
  0.002856038652  0.001380500370
  0.012719591448  0.006209058026
  0.044885776933  0.022054502576
  0.123592365132  0.062053369076
  0.252094381265  0.126574682416
  0.354958345704  0.171486179021
  0.294948638544  0.079168812133
  0.117673453678 -0.200546207865
  0.017282817508 -0.418504332018
  0.001266675722 -0.362469178227
  0.000106925174 -0.152307263026
  0.000084120890 -0.028520418792
  0.000001801118 -0.001431245978
   10    1   10
 0.6533994959    
  381.8290500      131.0052800      56.06871900      26.27559400    
  12.97521100      6.461493700      3.149036400      1.467906200    
 0.6316961200     0.2371018800    
 -0.000849894481
 -0.007249741612
 -0.033242541080
 -0.098731794556
 -0.207038963949
 -0.301249579479
 -0.324605053482
 -0.263450433512
 -0.154435860979
 -0.041900595426
*
Spectral Representation Operator
Core primitive basis
Exchange
End of Spectral Representation Operator
 

/Ga.ECP.Seijo.0s.0s.0e-AIMP-Ho3Ga5O12-Ga(oct).      
Embedding AIMP of Gao(3+) in Ho3Ga5O12 
made Mon.Feb.20.15:43:52.CET.2012
   3.000    0
    0    0
*
* External AIMP: 
* Local Pot. Param. : (ECP convention)
*                      A(AIMP)=-Zeff*A(ECP)
*
M1
   13
  401400.0000      66793.00000      16632.00000      4856.300000    
  1601.700000      575.5900000      203.0600000      77.34900000    
  35.02000000      10.46790000      4.815300000      2.121300000    
 0.8704900000    
 0.7125830211E-01 0.8038651209E-01 0.1434234869     0.2468514770    
 0.4003154633     0.5285707137     0.6367563486      1.243584282    
  1.166766570      1.219169864      2.305738100      1.125298453    
 0.1652137600    
M2
    0
COREREP
   1.000
PROJOP
    2
   20    3    2    2    2
  755.9645753      95.98973622      12.56040883    
  70959040.00      7603324.000      1319240.000      302670.5000    
  83251.81000      25933.12000      8976.547000      3372.096000    
  1348.620000      567.5549000      248.1887000      111.6749000    
  49.24165000      23.27517000      11.08148000      4.899352000    
  2.300821000      1.026582000     0.2092229000     0.7348584000E-01
  0.000013491980 -0.000004279721 -0.000001668454
  0.000131163490 -0.000043089026 -0.000017182594
  0.000530468705 -0.000171733544 -0.000067795233
 -0.000311934838  0.000104662099  0.000042491149
  0.001402143062 -0.000441489684 -0.000170366414
  0.003678574964 -0.001145094387 -0.000435706534
  0.013499437851 -0.004243406554 -0.001623449072
  0.040090970776 -0.012868207056 -0.004924725424
  0.106443055793 -0.035722981741 -0.013776256263
  0.232114782805 -0.086622755671 -0.033769061402
  0.364365328121 -0.169076139782 -0.068068424834
  0.307543390538 -0.210081266701 -0.089009839767
  0.080427472229  0.026402667268  0.011674813237
 -0.002091422559  0.532878063012  0.332606420842
  0.003317831003  0.503054231598  0.468714160866
 -0.001366110587  0.088545915906 -0.174875158396
  0.000409808202 -0.001322434686 -0.724395145994
 -0.000327816796  0.002347441251 -0.377814286265
  0.000091285482 -0.000332483363 -0.011206064465
  0.000007740907 -0.000091010142  0.007736068444
   15    2    6    6
  84.81496907      8.781342969    
  49597.56000      8521.695000      2303.899000      783.0395000    
  305.5494000      131.1653000      60.06042000      28.47848000    
  13.71275000      6.359916000      2.903849000      1.270245000    
 0.4810799000     0.1528591000     0.4856343000E-01
 -0.000016436648 -0.000006204581
 -0.000246402198 -0.000093677568
 -0.001889021594 -0.000716041246
 -0.009964969266 -0.003823121511
 -0.039612438318 -0.015359147823
 -0.119508472957 -0.048147117586
 -0.263337967848 -0.110433086406
 -0.386817073046 -0.174959808923
 -0.293028914384 -0.095733075858
 -0.071901147748  0.248018046096
 -0.001983833474  0.516939725229
 -0.001435359238  0.353101021259
  0.000189676527  0.049029305967
 -0.000062887243 -0.008441036641
  0.000027214961  0.000498849935
    9    1   10
  2.204661956    
  457.9123000      128.5433000      48.13583000      20.16190000    
  9.037338000      4.122069000      1.835645000     0.7793226000    
 0.2999676000    
  0.000572636571
  0.005774437752
  0.029833460690
  0.099741750567
  0.223403538602
  0.333024241363
  0.346023529035
  0.242187009324
  0.052925841421
*
Spectral Representation Operator
Core primitive basis
Exchange
End of Spectral Representation Operator
 

/Ga.ECP.Seijo.0s.0s.0e-AIMP-Ho3Ga5O12-Ga(tet).      
Embedding AIMP of Gat(3+) in Ho3Ga5O12 
made Mon.Feb.20.15:55:16.CET.2012
   3.000    0
    0    0
*
* External AIMP: 
* Local Pot. Param. : (ECP convention)
*                      A(AIMP)=-Zeff*A(ECP)
*
M1
   13
  400210.0000      66545.00000      16559.00000      4831.500000    
  1593.400000      572.3700000      201.6600000      76.87700000    
  34.80000000      10.36390000      4.769600000      2.094800000    
 0.8503900000    
 0.7138167750E-01 0.8055662510E-01 0.1438545379     0.2475927235    
 0.4013211503     0.5293527990     0.6392580487      1.249351097    
  1.159922233      1.240181138      2.304111146      1.107552542    
 0.1588976155    
M2
    0
COREREP
   1.000
PROJOP
    2
   20    3    2    2    2
  756.0269795      96.05270810      12.61641884    
  70959040.00      7603324.000      1319240.000      302670.5000    
  83251.81000      25933.12000      8976.547000      3372.096000    
  1348.620000      567.5549000      248.1887000      111.6749000    
  49.24165000      23.27517000      11.08148000      4.899352000    
  2.300821000      1.026582000     0.2092229000     0.7348584000E-01
  0.000013491979 -0.000004279738 -0.000001668741
  0.000131163477 -0.000043089166 -0.000017186918
  0.000530468657 -0.000171734181 -0.000067809011
 -0.000311934854  0.000104662405  0.000042496006
  0.001402142658 -0.000441493150 -0.000170399815
  0.003678574115 -0.001145097478 -0.000435877719
  0.013499432416 -0.004243452718 -0.001623703147
  0.040090962561 -0.012868221484 -0.004926812183
  0.106443001322 -0.035723440800 -0.013777692952
  0.232114730075 -0.086622598923 -0.033785898225
  0.364364990177 -0.169079137379 -0.068066681043
  0.307543599168 -0.210077681322 -0.089089509247
  0.080427548483  0.026387553334  0.011820997517
 -0.002090543722  0.532916211721  0.332373753706
  0.003316467740  0.503013649713  0.469594766673
 -0.001364263809  0.088610384154 -0.176478470452
  0.000407458941 -0.001433479223 -0.722585975846
 -0.000325910969  0.002441188231 -0.379746711006
  0.000089955123 -0.000403131859 -0.009082324086
  0.000008009284 -0.000077104762  0.007263594393
   15    2    6    6
  84.87788807      8.837908044    
  49597.56000      8521.695000      2303.899000      783.0395000    
  305.5494000      131.1653000      60.06042000      28.47848000    
  13.71275000      6.359916000      2.903849000      1.270245000    
 0.4810799000     0.1528591000     0.4856343000E-01
 -0.000016436703 -0.000006206581
 -0.000246403845 -0.000093689472
 -0.001889028551 -0.000716256492
 -0.009965032152 -0.003823652339
 -0.039612570436 -0.015363778214
 -0.119509173909 -0.048153388894
 -0.263338650509 -0.110471170878
 -0.386823749833 -0.174969623056
 -0.293028115339 -0.095825251134
 -0.071894577737  0.248301656094
 -0.001973509558  0.516850106984
 -0.001441248311  0.353211491289
  0.000194605425  0.048726864800
 -0.000061574383 -0.008612669713
  0.000026275058  0.000748431188
    9    1   10
  2.262383878    
  457.9123000      128.5433000      48.13583000      20.16190000    
  9.037338000      4.122069000      1.835645000     0.7793226000    
 0.2999676000    
 -0.000572560990
 -0.005772512592
 -0.029828672689
 -0.099709291351
 -0.223384509948
 -0.332862454679
 -0.345944900899
 -0.241181068217
 -0.055541081652
*
Spectral Representation Operator
Core primitive basis
Exchange
End of Spectral Representation Operator
 

/Ga.ECP.Seijo.20s15p9d.1s1p1d.0e-AIMP-Ho3Ga5O12-Ga(tet).      
Embedding AIMP of Gat(3+) in Ho3Ga5O12 with orthogonality functions
made Mon.Feb.20.15:55:16.CET.2012
   3.000    2
   20    1
  70959040.00      7603324.000      1319240.000      302670.5000    
  83251.81000      25933.12000      8976.547000      3372.096000    
  1348.620000      567.5549000      248.1887000      111.6749000    
  49.24165000      23.27517000      11.08148000      4.899352000    
  2.300821000      1.026582000     0.2092229000     0.7348584000E-01
  -0.000001668741
  -0.000017186918
  -0.000067809011
   0.000042496006
  -0.000170399815
  -0.000435877719
  -0.001623703147
  -0.004926812183
  -0.013777692952
  -0.033785898225
  -0.068066681043
  -0.089089509247
   0.011820997517
   0.332373753706
   0.469594766673
  -0.176478470452
  -0.722585975846
  -0.379746711006
  -0.009082324086
   0.007263594393
   15    1
  49597.56000      8521.695000      2303.899000      783.0395000    
  305.5494000      131.1653000      60.06042000      28.47848000    
  13.71275000      6.359916000      2.903849000      1.270245000    
 0.4810799000     0.1528591000     0.4856343000E-01
  -0.000006206581
  -0.000093689472
  -0.000716256492
  -0.003823652339
  -0.015363778214
  -0.048153388894
  -0.110471170878
  -0.174969623056
  -0.095825251134
   0.248301656094
   0.516850106984
   0.353211491289
   0.048726864800
  -0.008612669713
   0.000748431188
    9    1
  457.9123000      128.5433000      48.13583000      20.16190000    
  9.037338000      4.122069000      1.835645000     0.7793226000    
 0.2999676000    
 -0.000572560990
 -0.005772512592
 -0.029828672689
 -0.099709291351
 -0.223384509948
 -0.332862454679
 -0.345944900899
 -0.241181068217
 -0.055541081652
*
* External AIMP: 
* Local Pot. Param. : (ECP convention)
*                      A(AIMP)=-Zeff*A(ECP)
*
M1
   13
  400210.0000      66545.00000      16559.00000      4831.500000    
  1593.400000      572.3700000      201.6600000      76.87700000    
  34.80000000      10.36390000      4.769600000      2.094800000    
 0.8503900000    
 0.7138167750E-01 0.8055662510E-01 0.1438545379     0.2475927235    
 0.4013211503     0.5293527990     0.6392580487      1.249351097    
  1.159922233      1.240181138      2.304111146      1.107552542    
 0.1588976155    
M2
    0
COREREP
   1.000
PROJOP
    2
   20    3    2    2    2
  756.0269795      96.05270810      12.61641884    
  70959040.00      7603324.000      1319240.000      302670.5000    
  83251.81000      25933.12000      8976.547000      3372.096000    
  1348.620000      567.5549000      248.1887000      111.6749000    
  49.24165000      23.27517000      11.08148000      4.899352000    
  2.300821000      1.026582000     0.2092229000     0.7348584000E-01
  0.000013491979 -0.000004279738 -0.000001668741
  0.000131163477 -0.000043089166 -0.000017186918
  0.000530468657 -0.000171734181 -0.000067809011
 -0.000311934854  0.000104662405  0.000042496006
  0.001402142658 -0.000441493150 -0.000170399815
  0.003678574115 -0.001145097478 -0.000435877719
  0.013499432416 -0.004243452718 -0.001623703147
  0.040090962561 -0.012868221484 -0.004926812183
  0.106443001322 -0.035723440800 -0.013777692952
  0.232114730075 -0.086622598923 -0.033785898225
  0.364364990177 -0.169079137379 -0.068066681043
  0.307543599168 -0.210077681322 -0.089089509247
  0.080427548483  0.026387553334  0.011820997517
 -0.002090543722  0.532916211721  0.332373753706
  0.003316467740  0.503013649713  0.469594766673
 -0.001364263809  0.088610384154 -0.176478470452
  0.000407458941 -0.001433479223 -0.722585975846
 -0.000325910969  0.002441188231 -0.379746711006
  0.000089955123 -0.000403131859 -0.009082324086
  0.000008009284 -0.000077104762  0.007263594393
   15    2    6    6
  84.87788807      8.837908044    
  49597.56000      8521.695000      2303.899000      783.0395000    
  305.5494000      131.1653000      60.06042000      28.47848000    
  13.71275000      6.359916000      2.903849000      1.270245000    
 0.4810799000     0.1528591000     0.4856343000E-01
 -0.000016436703 -0.000006206581
 -0.000246403845 -0.000093689472
 -0.001889028551 -0.000716256492
 -0.009965032152 -0.003823652339
 -0.039612570436 -0.015363778214
 -0.119509173909 -0.048153388894
 -0.263338650509 -0.110471170878
 -0.386823749833 -0.174969623056
 -0.293028115339 -0.095825251134
 -0.071894577737  0.248301656094
 -0.001973509558  0.516850106984
 -0.001441248311  0.353211491289
  0.000194605425  0.048726864800
 -0.000061574383 -0.008612669713
  0.000026275058  0.000748431188
    9    1   10
  2.262383878    
  457.9123000      128.5433000      48.13583000      20.16190000    
  9.037338000      4.122069000      1.835645000     0.7793226000    
 0.2999676000    
 -0.000572560990
 -0.005772512592
 -0.029828672689
 -0.099709291351
 -0.223384509948
 -0.332862454679
 -0.345944900899
 -0.241181068217
 -0.055541081652
*
Spectral Representation Operator
Core primitive basis
Exchange
End of Spectral Representation Operator
 

/O.ECP.Seijo.0s.0s.0e-AIMP-Ho3Ga5O12-O.         
Embedding AIMP of O(2-) in Ho3Ga5O12 
made Mon.Feb.20.16:05:02.CET.2012
  -2.000    0
    0    0
*
* External AIMP: 
* Local Pot. Param. : (ECP convention)
*                      A(AIMP)=-Zeff*A(ECP)
*
M1
   12
  282885.8300      34740.01200      6502.573000      1486.426000    
  406.8273300      124.8370000      41.98461900      13.81633000    
  4.272136000      1.610321600     0.6078900000     0.2644720000    
 -.2176212871E-01 -.3180611026E-01 -.6529150334E-01 -.1218657518    
 -.2183453103     -.3840791025     -.5099038585     -.4594812723    
 -.7574493745     -1.301590340     -1.059936761     -.6848848674E-01
M2
    0
COREREP
   1.000
PROJOP
    1
    8    2    2    2
  40.38353266      2.029831756    
  2048.050000      309.0990000      70.41410000      19.70120000    
  6.031450000      10.22970000     0.9340900000     0.2862500000    
  0.006202002776  0.001317346634
  0.045639011631  0.009588906376
  0.200054624241  0.046719247220
  0.473801156465  0.114451355464
  0.380740297537  0.097888543650
  0.028985182975  0.069643147109
  0.024655821623 -0.462091756920
 -0.005629093558 -0.642188481194
    6    1    6
 0.5703802165    
  34.97120000      7.845090000      2.303320000     0.7219800000    
 0.2155300000     0.5900000000E-01
 -0.013145083028
 -0.085296713305
 -0.248782989847
 -0.436292809904
 -0.511352408164
  0.092906143620
*
Spectral Representation Operator
Core primitive basis
Exchange
End of Spectral Representation Operator
 
 
********************************************************************************
*         E.7.X. Yb3Ga5O12 (YbGG)
********************************************************************************
*           E.7.X.a. Yb3Ga5O12
*             Structure:
*                    F.Euler, J.A.Bruce, Acta Cryst. (1965) 19, 971
*                    (Ia-3d; a=12.204A, x=-0.0259, =0.0563, z=0.1519)
*             Embedding potentials:
*                    L.Seijo, Z.Barandiaran, to be published
*                    Out of SCEI DKH-HF calculations
*             /Yb.ECP.Seijo.0s.0s.0e-AIMP-Yb3Ga5O12-Yb.
*             /Ga.ECP.Seijo.0s.0s.0e-AIMP-Yb3Ga5O12-Ga(oct).
*             /Ga.ECP.Seijo.0s.0s.0e-AIMP-Yb3Ga5O12-Ga(tet).
*             /Ga.ECP.Seijo.20s15p9d.1s1p1d.0e-AIMP-Yb3Ga5O12-Ga(tet).
*             /O.ECP.Seijo.0s.0s.0e-AIMP-Yb3Ga5O12-O.
********************************************************************************
/Yb.ECP.Seijo.0s.0s.0e-AIMP-Yb3Ga5O12-Yb.       
Embedding AIMP of Yb(3+) in Yb3Ga5O12 
made Mon.Feb.20.14:49:01.CET.2012
   3.000    0
    0    0
*
* External AIMP: 
* Local Pot. Param. : (ECP convention)
*                      A(AIMP)=-Zeff*A(ECP)
*
M1
   15
  499890.0000      97959.00000      28077.00000      9139.200000    
  3222.900000      1151.840000      464.5700000      213.4200000    
  77.56500000      47.72800000      10.81590000      5.650200000    
  2.113180000      1.031310000     0.5557800000    
 0.2159370093     0.2109436317     0.3501863802     0.5382596270    
 0.7088768189     0.9846914176      1.755014024      1.268244732    
  2.544752547      2.842445213      4.524422868      2.894431941    
  1.980502136      1.366895744     0.1477292514    
M2
    0
COREREP
   1.000
PROJOP
    3
   27    5    2    2    2    2    2
  4523.287455      776.6918566      179.4690821      37.56020271    
  4.809580291    
 0.7167191700E+11  6852841700.      1106179400.      229631520.0    
  55103176.00      14844859.00      4330035.300      1362292.700    
  455129.5400      160284.0500      59517.78700      23205.18500    
  9486.296400      4034.797200      1776.829900      806.2923500    
  375.3039600      170.0975800      80.21751000      33.23581400    
  17.20624400      6.885913100      3.358038400     0.9118131500    
 0.3990368400     0.6304972100E-01 0.2556606500E-01
  0.000000175275  0.000000056507  0.000000037781 -0.000000009627  0.000000007841
 -0.000000870625 -0.000000281104 -0.000000187318  0.000000048078 -0.000000038820
  0.000003259519  0.000001062262  0.000000693294 -0.000000185966  0.000000142704
 -0.000013318408 -0.000004517862 -0.000002688822  0.000000867475 -0.000000538328
  0.000563760984  0.000208699944  0.000099742762 -0.000047292090  0.000018582086
  0.000701864958  0.000264265354  0.000121030075 -0.000061465238  0.000022234118
  0.001866914276  0.000691009580  0.000333159300 -0.000155867735  0.000062002817
  0.003761623895  0.001420437643  0.000654359170 -0.000329738487  0.000121510153
  0.007760077364  0.002901285564  0.001395130700 -0.000656998814  0.000254570752
  0.015605426148  0.005951628979  0.002784651349 -0.001376045294  0.000544564790
  0.031000123425  0.011933554138  0.005677615186 -0.002744295490  0.001065378896
  0.060751604889  0.024090199991  0.011424743676 -0.005582504630  0.002187786423
  0.116368630696  0.048022379108  0.023068749956 -0.011230202700  0.004387782476
  0.208919077467  0.093795857758  0.045367433906 -0.022261462091  0.008720683982
  0.313153091877  0.160674710562  0.080433041010 -0.039469458255  0.015467503789
  0.307581607170  0.198136943947  0.101650375106 -0.050925842019  0.020027961887
  0.129135682673  0.005362699643 -0.002896011645  0.003350669901 -0.001417412638
  0.009588129797 -0.494640278060 -0.417730617394  0.230250611380 -0.092743312203
  0.000246464049 -0.548198124308 -0.597640472378  0.370605053562 -0.153068124681
 -0.000306715662 -0.100523842132  0.440464185702 -0.428093036704  0.194535396884
  0.000165012240  0.015231716753  0.835421564301 -1.008998413893  0.490683075388
 -0.000081441411 -0.005107497101  0.118981682954  0.598259566403 -0.428400777937
  0.000044629687  0.002305913242 -0.014020083892  0.873904750396 -0.781838562388
 -0.000013947898 -0.000677981552  0.003507857603  0.054196647192  0.794549299280
  0.000006004994  0.000315156081 -0.001626968873 -0.012675868400  0.568412202640
 -0.000001569583 -0.000080560841  0.000391987510  0.002422809527 -0.011262900952
  0.000000853934  0.000039174230 -0.000189427053 -0.001180041365  0.000306686259
   23    4    6    6    6    6
  686.5293913      151.5887498      28.16699639      2.346262123    
  54522375.00      7756402.200      1591450.300      401990.8200    
  118400.3300      39288.98900      14434.44400      5789.641700    
  2497.817000      1143.668800      551.5359100      277.6847600    
  144.9833300      77.52811200      41.79454800      23.21254600    
  12.92239700      7.019198300      3.751671900      1.930185600    
 0.9226218900     0.4216174200     0.1753719100    
 -0.000001387188  0.000000753457 -0.000000263120 -0.000000153938
 -0.000027914841  0.000013752513 -0.000007019598 -0.000002029799
 -0.000072370395  0.000037191256 -0.000016402639 -0.000006456790
 -0.000205824703  0.000101687450 -0.000051899254 -0.000014534219
 -0.000555584843  0.000281717300 -0.000132720184 -0.000049928043
 -0.001520184050  0.000768624399 -0.000370678479 -0.000128888914
 -0.004201924280  0.002139147584 -0.001026493294 -0.000365001901
 -0.011677615429  0.005992727419 -0.002887464953 -0.001019423152
 -0.031964275246  0.016638326755 -0.008032446278 -0.002850542449
 -0.081634383818  0.043569175810 -0.021180419697 -0.007495096474
 -0.178289688287  0.098948516860 -0.048483450665 -0.017268251808
 -0.300724967094  0.175801451714 -0.087477234456 -0.031046501924
 -0.336123311595  0.194972500943 -0.096165761691 -0.034509666435
 -0.201436366000  0.003333509293  0.018514410172  0.008899051396
 -0.046963750463 -0.368078209099  0.273761550062  0.104048284763
 -0.002135954640 -0.488741428484  0.395030494169  0.158256191269
 -0.000316380176 -0.220339097141 -0.007856667707 -0.031947447721
  0.000226510544 -0.030843677958 -0.529510150481 -0.265868624754
 -0.000028609020 -0.001471927863 -0.500415318988 -0.319265375704
  0.000029728280 -0.000284544605 -0.134522171709  0.099421807607
 -0.000011116348  0.000042242814 -0.006306054246  0.524517156251
  0.000003697545 -0.000018917421 -0.001124577493  0.528996910142
 -0.000000862768  0.000008240723 -0.000379905964  0.032493055709
   15    2   10   10
  116.5224455      15.34454537    
  18187.93200      4693.706000      1574.519500      630.4675200    
  284.5339500      138.5752100      70.87766300      37.39173500    
  20.23540500      10.97915700      5.849528600      3.056691800    
  1.522995800     0.6515698300     0.8572807700E-01
 -0.000065296074 -0.000031678154
 -0.000496454557 -0.000241838383
 -0.003095697377 -0.001510510396
 -0.014784033844 -0.007278462308
 -0.053387082869 -0.026530891556
 -0.145644779973 -0.073921017618
 -0.283479487070 -0.143321838558
 -0.364310791476 -0.172199541632
 -0.259988156164 -0.029673571216
 -0.085896096567  0.267107190944
 -0.010103380284  0.441216167890
 -0.000802290874  0.326042934908
 -0.000146682272  0.104894571586
 -0.000039265346  0.009186605209
  0.000000643584  0.000185076580
   10    1   13
  1.038923414    
  936.4792500      236.1678500      88.82383000      38.89926000    
  18.23438400      8.741668500      4.099379700      1.835545100    
 0.7588106600     0.2727080100    
 -0.000193435296
 -0.003146176109
 -0.020637732311
 -0.076074870777
 -0.188462371086
 -0.306659007058
 -0.348520174410
 -0.285341321516
 -0.159647835440
 -0.038600745510
*
Spectral Representation Operator
Core primitive basis
Exchange
End of Spectral Representation Operator
 

/Ga.ECP.Seijo.0s.0s.0e-AIMP-Yb3Ga5O12-Ga(oct).      
Embedding AIMP of Gao(3+) in Yb3Ga5O12 
made Mon.Feb.20.14:59:35.CET.2012
   3.000    0
    0    0
*
* External AIMP: 
* Local Pot. Param. : (ECP convention)
*                      A(AIMP)=-Zeff*A(ECP)
*
M1
   13
  401210.0000      66712.00000      16612.00000      4849.800000    
  1599.200000      574.5200000      202.5000000      77.12000000    
  34.90400000      10.41120000      4.788800000      2.105600000    
 0.8549900000    
 0.7128999745E-01 0.8044923306E-01 0.1435075798     0.2470787077    
 0.4006806498     0.5289464502     0.6381348638      1.246933832    
  1.163427383      1.231097386      2.305473057      1.115875840    
 0.1604383533    
M2
    0
COREREP
   1.000
PROJOP
    2
   20    3    2    2    2
  755.9264126      95.95137004      12.52152269    
  70959040.00      7603324.000      1319240.000      302670.5000    
  83251.81000      25933.12000      8976.547000      3372.096000    
  1348.620000      567.5549000      248.1887000      111.6749000    
  49.24165000      23.27517000      11.08148000      4.899352000    
  2.300821000      1.026582000     0.2092229000     0.7348584000E-01
  0.000013491980 -0.000004279726 -0.000001668147
  0.000131163490 -0.000043089114 -0.000017178170
  0.000530468704 -0.000171733805 -0.000067780052
 -0.000311934842  0.000104662185  0.000042477806
  0.001402143099 -0.000441489607 -0.000170354037
  0.003678574804 -0.001145098829 -0.000435644075
  0.013499438570 -0.004243399057 -0.001623484225
  0.040090968416 -0.012868268983 -0.004923821453
  0.106443064711 -0.035722870834 -0.013777175737
  0.232114759515 -0.086623336699 -0.033760903940
  0.364365386249 -0.169075031857 -0.068080142819
  0.307543254414 -0.210084869931 -0.088961289395
  0.080427788889  0.026411031518  0.011560750731
 -0.002092023082  0.532861169854  0.332854377548
  0.003318713858  0.503088356766  0.468152646727
 -0.001367374146  0.088488749555 -0.173844977013
  0.000411302168 -0.001253015322 -0.726041418737
 -0.000328948945  0.002289109936 -0.375923064883
  0.000092050473 -0.000290121549 -0.012683397760
  0.000007724436 -0.000091456897  0.007594715532
   15    2    6    6
  84.77659748      8.741083770    
  49597.56000      8521.695000      2303.899000      783.0395000    
  305.5494000      131.1653000      60.06042000      28.47848000    
  13.71275000      6.359916000      2.903849000      1.270245000    
 0.4810799000     0.1528591000     0.4856343000E-01
 -0.000016436690 -0.000006204776
 -0.000246402711 -0.000093674899
 -0.001889026299 -0.000716059019
 -0.009964990784 -0.003823026702
 -0.039612541348 -0.015359535173
 -0.119508741123 -0.048145804755
 -0.263338715110 -0.110437363655
 -0.386818030856 -0.174950120224
 -0.293029316850 -0.095755108540
 -0.071898511862  0.248086270470
 -0.001982029791  0.516864040343
 -0.001436224388  0.353189936680
  0.000193527435  0.048376406906
 -0.000073898383 -0.006750608631
  0.000031140499 -0.000116109712
    9    1   10
  2.163736566    
  457.9123000      128.5433000      48.13583000      20.16190000    
  9.037338000      4.122069000      1.835645000     0.7793226000    
 0.2999676000    
 -0.000572966529
 -0.005772347813
 -0.029846846651
 -0.099704588349
 -0.223546116827
 -0.332716321138
 -0.346704218687
 -0.240439555873
 -0.055084566932
*
Spectral Representation Operator
Core primitive basis
Exchange
End of Spectral Representation Operator
 

/Ga.ECP.Seijo.0s.0s.0e-AIMP-Yb3Ga5O12-Ga(tet).      
Embedding AIMP of Gat(3+) in Yb3Ga5O12 
made Mon.Feb.20.15:10:24.CET.2012
   3.000    0
    0    0
*
* External AIMP: 
* Local Pot. Param. : (ECP convention)
*                      A(AIMP)=-Zeff*A(ECP)
*
M1
   13
  400950.0000      66625.00000      16567.00000      4833.600000    
  1594.500000      572.9900000      201.8700000      76.89900000    
  34.79500000      10.34970000      4.758700000      2.085100000    
 0.8362200000    
 0.7131377484E-01 0.8056055658E-01 0.1438443717     0.2475002864    
 0.4010219593     0.5291082814     0.6392462573      1.249801822    
  1.160235174      1.244382615      2.306134990      1.103640798    
 0.1565424486    
M2
    0
COREREP
   1.000
PROJOP
    2
   20    3    2    2    2
  755.9505440      95.97595630      12.53890871    
  70959040.00      7603324.000      1319240.000      302670.5000    
  83251.81000      25933.12000      8976.547000      3372.096000    
  1348.620000      567.5549000      248.1887000      111.6749000    
  49.24165000      23.27517000      11.08148000      4.899352000    
  2.300821000      1.026582000     0.2092229000     0.7348584000E-01
  0.000013491979 -0.000004279743 -0.000001668443
  0.000131163477 -0.000043089246 -0.000017182635
  0.000530468656 -0.000171734398 -0.000067794415
 -0.000311934862  0.000104662360  0.000042484335
  0.001402142688 -0.000441493339 -0.000170384125
  0.003678573911 -0.001145103167 -0.000435799877
  0.013499433034 -0.004243449309 -0.001623686849
  0.040090959732 -0.012868296317 -0.004925750045
  0.106443009569 -0.035723365278 -0.013778165684
  0.232114703097 -0.086623268244 -0.033776665369
  0.364365038726 -0.169078198556 -0.068076179795
  0.307543462799 -0.210081523223 -0.089038184190
  0.080427898881  0.026395820450  0.011706581483
 -0.002091178368  0.532900665336  0.332611905854
  0.003317387420  0.503049693043  0.469019920955
 -0.001365599061  0.088547839963 -0.175462242001
  0.000409057060 -0.001360684836 -0.724233401090
 -0.000327162171  0.002377421401 -0.377616664090
  0.000091096195 -0.000340126289 -0.011336170604
  0.000007661594 -0.000095964264  0.007839470520
   15    2    6    6
  84.80110693      8.758058690    
  49597.56000      8521.695000      2303.899000      783.0395000    
  305.5494000      131.1653000      60.06042000      28.47848000    
  13.71275000      6.359916000      2.903849000      1.270245000    
 0.4810799000     0.1528591000     0.4856343000E-01
 -0.000016436779 -0.000006206287
 -0.000246404751 -0.000093692632
 -0.001889037110 -0.000716229269
 -0.009965070177 -0.003823765445
 -0.039612756329 -0.015363215755
 -0.119509643955 -0.048155158164
 -0.263340008926 -0.110465858962
 -0.386825495596 -0.174984245253
 -0.293029213638 -0.095793247406
 -0.071888509159  0.248275070471
 -0.001972508714  0.516984926573
 -0.001439486494  0.352873270316
  0.000194845962  0.048665867294
 -0.000069369489 -0.007426031029
  0.000029686852  0.000273009891
    9    1   10
  2.182054506    
  457.9123000      128.5433000      48.13583000      20.16190000    
  9.037338000      4.122069000      1.835645000     0.7793226000    
 0.2999676000    
  0.000572667757
  0.005769950163
  0.029831719548
  0.099664699248
  0.223437495137
  0.332581244785
  0.346294214698
  0.239689774111
  0.058163606683
*
Spectral Representation Operator
Core primitive basis
Exchange
End of Spectral Representation Operator
 

/Ga.ECP.Seijo.20s15p9d.1s1p1d.0e-AIMP-Yb3Ga5O12-Ga(tet).      
Embedding AIMP of Gat(3+) in Yb3Ga5O12 with orthogonality orbitals
made Mon.Feb.20.15:10:24.CET.2012
   3.000    2
   20    1
  70959040.00      7603324.000      1319240.000      302670.5000    
  83251.81000      25933.12000      8976.547000      3372.096000    
  1348.620000      567.5549000      248.1887000      111.6749000    
  49.24165000      23.27517000      11.08148000      4.899352000    
  2.300821000      1.026582000     0.2092229000     0.7348584000E-01
  -0.000001668443
  -0.000017182635
  -0.000067794415
   0.000042484335
  -0.000170384125
  -0.000435799877
  -0.001623686849
  -0.004925750045
  -0.013778165684
  -0.033776665369
  -0.068076179795
  -0.089038184190
   0.011706581483
   0.332611905854
   0.469019920955
  -0.175462242001
  -0.724233401090
  -0.377616664090
  -0.011336170604
   0.007839470520
   15    1
  49597.56000      8521.695000      2303.899000      783.0395000    
  305.5494000      131.1653000      60.06042000      28.47848000    
  13.71275000      6.359916000      2.903849000      1.270245000    
 0.4810799000     0.1528591000     0.4856343000E-01
  -0.000006206287
  -0.000093692632
  -0.000716229269
  -0.003823765445
  -0.015363215755
  -0.048155158164
  -0.110465858962
  -0.174984245253
  -0.095793247406
   0.248275070471
   0.516984926573
   0.352873270316
   0.048665867294
  -0.007426031029
   0.000273009891
    9    1
  457.9123000      128.5433000      48.13583000      20.16190000    
  9.037338000      4.122069000      1.835645000     0.7793226000    
 0.2999676000    
  0.000572667757
  0.005769950163
  0.029831719548
  0.099664699248
  0.223437495137
  0.332581244785
  0.346294214698
  0.239689774111
  0.058163606683
*
* External AIMP: 
* Local Pot. Param. : (ECP convention)
*                      A(AIMP)=-Zeff*A(ECP)
*
M1
   13
  400950.0000      66625.00000      16567.00000      4833.600000    
  1594.500000      572.9900000      201.8700000      76.89900000    
  34.79500000      10.34970000      4.758700000      2.085100000    
 0.8362200000    
 0.7131377484E-01 0.8056055658E-01 0.1438443717     0.2475002864    
 0.4010219593     0.5291082814     0.6392462573      1.249801822    
  1.160235174      1.244382615      2.306134990      1.103640798    
 0.1565424486    
M2
    0
COREREP
   1.000
PROJOP
    2
   20    3    2    2    2
  755.9505440      95.97595630      12.53890871    
  70959040.00      7603324.000      1319240.000      302670.5000    
  83251.81000      25933.12000      8976.547000      3372.096000    
  1348.620000      567.5549000      248.1887000      111.6749000    
  49.24165000      23.27517000      11.08148000      4.899352000    
  2.300821000      1.026582000     0.2092229000     0.7348584000E-01
  0.000013491979 -0.000004279743 -0.000001668443
  0.000131163477 -0.000043089246 -0.000017182635
  0.000530468656 -0.000171734398 -0.000067794415
 -0.000311934862  0.000104662360  0.000042484335
  0.001402142688 -0.000441493339 -0.000170384125
  0.003678573911 -0.001145103167 -0.000435799877
  0.013499433034 -0.004243449309 -0.001623686849
  0.040090959732 -0.012868296317 -0.004925750045
  0.106443009569 -0.035723365278 -0.013778165684
  0.232114703097 -0.086623268244 -0.033776665369
  0.364365038726 -0.169078198556 -0.068076179795
  0.307543462799 -0.210081523223 -0.089038184190
  0.080427898881  0.026395820450  0.011706581483
 -0.002091178368  0.532900665336  0.332611905854
  0.003317387420  0.503049693043  0.469019920955
 -0.001365599061  0.088547839963 -0.175462242001
  0.000409057060 -0.001360684836 -0.724233401090
 -0.000327162171  0.002377421401 -0.377616664090
  0.000091096195 -0.000340126289 -0.011336170604
  0.000007661594 -0.000095964264  0.007839470520
   15    2    6    6
  84.80110693      8.758058690    
  49597.56000      8521.695000      2303.899000      783.0395000    
  305.5494000      131.1653000      60.06042000      28.47848000    
  13.71275000      6.359916000      2.903849000      1.270245000    
 0.4810799000     0.1528591000     0.4856343000E-01
 -0.000016436779 -0.000006206287
 -0.000246404751 -0.000093692632
 -0.001889037110 -0.000716229269
 -0.009965070177 -0.003823765445
 -0.039612756329 -0.015363215755
 -0.119509643955 -0.048155158164
 -0.263340008926 -0.110465858962
 -0.386825495596 -0.174984245253
 -0.293029213638 -0.095793247406
 -0.071888509159  0.248275070471
 -0.001972508714  0.516984926573
 -0.001439486494  0.352873270316
  0.000194845962  0.048665867294
 -0.000069369489 -0.007426031029
  0.000029686852  0.000273009891
    9    1   10
  2.182054506    
  457.9123000      128.5433000      48.13583000      20.16190000    
  9.037338000      4.122069000      1.835645000     0.7793226000    
 0.2999676000    
  0.000572667757
  0.005769950163
  0.029831719548
  0.099664699248
  0.223437495137
  0.332581244785
  0.346294214698
  0.239689774111
  0.058163606683
*
Spectral Representation Operator
Core primitive basis
Exchange
End of Spectral Representation Operator
 

/O.ECP.Seijo.0s.0s.0e-AIMP-Yb3Ga5O12-O.         
Embedding AIMP of O(2-) in Yb3Ga5O12 
made Mon.Feb.20.15:20:30.CET.2012
  -2.000    0
    0    0
*
* External AIMP: 
* Local Pot. Param. : (ECP convention)
*                      A(AIMP)=-Zeff*A(ECP)
*
M1
   12
  282885.8300      34740.01200      6502.573000      1486.426000    
  406.8273300      124.8370000      41.98461900      13.81633000    
  4.272136000      1.610321600     0.6078900000     0.2644720000    
 -.2176475092E-01 -.3181300651E-01 -.6529488239E-01 -.1218971167    
 -.2183492907     -.3841768733     -.5099003344     -.4597465295    
 -.7573334439     -1.303726904     -1.058092691     -.6790417698E-01
M2
    0
COREREP
   1.000
PROJOP
    1
    8    2    2    2
  40.29240648      1.941030984    
  2048.050000      309.0990000      70.41410000      19.70120000    
  6.031450000      10.22970000     0.9340900000     0.2862500000    
  0.006201979423  0.001317869602
  0.045638750022  0.009595836109
  0.200053942712  0.046726859396
  0.473794731563  0.114671890187
  0.380731784350  0.098511830105
  0.028993808124  0.069150758325
  0.024679186194 -0.463299415188
 -0.005646353921 -0.641187598838
    6    1    6
 0.4814366592    
  34.97120000      7.845090000      2.303320000     0.7219800000    
 0.2155300000     0.5900000000E-01
 -0.013144055270
 -0.085341350553
 -0.248652121295
 -0.437084106428
 -0.510679805269
  0.093296582489
*
Spectral Representation Operator
Core primitive basis
Exchange
End of Spectral Representation Operator
 
 
********************************************************************************
*         E.7.X. Lu3Ga5O12 (LuGG)
********************************************************************************
*           E.7.X.a. Lu3Ga5O12
*             Structure:
*                    F.Euler, J.A.Bruce, Acta Cryst. (1965) 19, 971
*                    (Ia-3d; a=12.188A, x=-0.0252, =0.0570, z=0.1506)
*             Embedding potentials:
*                    L.Seijo, Z.Barandiaran, to be published
*                    Out of SCEI DKH-HF calculations
*             /Lu.ECP.Seijo.0s.0s.0e-AIMP-Lu3Ga5O12-Lu.
*             /Ga.ECP.Seijo.0s.0s.0e-AIMP-Lu3Ga5O12-Ga(oct).
*             /Ga.ECP.Seijo.0s.0s.0e-AIMP-Lu3Ga5O12-Ga(tet).
*             /Ga.ECP.Seijo.20s15p9d.1s1p1d.0e-AIMP-Lu3Ga5O12-Ga(tet).
*             /O.ECP.Seijo.0s.0s.0e-AIMP-Lu3Ga5O12-O.
********************************************************************************
/Lu.ECP.Seijo.0s.0s.0e-AIMP-Lu3Ga5O12-Lu.       
Embedding AIMP of Lu(3+) in Lu3Ga5O12 
made Mon.Feb.20.23:56:58.CET.2012
   3.000    0
    0    0
*
* External AIMP: 
* Local Pot. Param. : (ECP convention)
*                      A(AIMP)=-Zeff*A(ECP)
*
M1
   15
  528360.0000      107874.0000      31866.00000      10573.00000    
  3792.900000      1381.990000      548.4200000      254.7000000    
  87.83400000      51.25400000      11.44080000      6.053100000    
  2.304380000      1.128680000     0.6297600000    
 0.2129802074     0.2001223527     0.3296448130     0.5080033450    
 0.6790219028     0.9026772372      1.630065931      1.465685184    
  2.232682332      3.316473190      4.445172093      3.116346022    
  1.949315243      1.445576457     0.2329003552    
M2
    0
COREREP
   1.000
PROJOP
    3
   27    5    2    2    2    2    2
  4669.194805      804.8103557      186.3370804      38.90491361    
  4.958311241    
 0.6701311900E+11  7216717800.      1171529200.      235233120.0    
  55877724.00      14949778.00      4363017.000      1375340.500    
  456540.5200      160435.3700      59637.10400      23233.14400    
  9474.040900      4032.731300      1779.753900      807.8776800    
  374.9260700      172.1622700      81.75905400      34.04620200    
  17.67359800      7.084092600      3.479507300     0.9931652500    
 0.4458321400     0.7721303500E-01 0.3053352200E-01
 -0.000000244159 -0.000000081509 -0.000000051623  0.000000015327 -0.000000006644
  0.000001120858  0.000000374559  0.000000236647 -0.000000070584  0.000000030564
 -0.000004011432 -0.000001348944 -0.000000839505  0.000000257493 -0.000000110740
  0.000016057859  0.000005559798  0.000003220044 -0.000001123080  0.000000468623
 -0.000595541280 -0.000221485213 -0.000106087671  0.000050449977 -0.000019778323
 -0.000742824110 -0.000280859360 -0.000128808249  0.000065474550 -0.000025369836
 -0.001956849061 -0.000727632357 -0.000351835819  0.000165073771 -0.000064910421
 -0.003949491923 -0.001497905709 -0.000690998523  0.000348563081 -0.000135130134
 -0.008181500880 -0.003073807892 -0.001481830266  0.000700437693 -0.000275568124
 -0.016327091788 -0.006257096701 -0.002933279448  0.001449218321 -0.000561439989
 -0.032284660274 -0.012495627948 -0.005959476526  0.002885518939 -0.001126643334
 -0.063239750938 -0.025221362877 -0.011988780161  0.005864798893 -0.002284568812
 -0.120490529949 -0.050090619882 -0.024128862409  0.011760085921 -0.004583371928
 -0.213403003773 -0.096618156766 -0.046861707095  0.023033801827 -0.008992180504
 -0.315171280207 -0.163496003867 -0.082167499715  0.040358978803 -0.015749051846
 -0.302931793806 -0.195815525624 -0.100636935040  0.050566245214 -0.019841000759
 -0.121186108129  0.010629782216  0.012944291414 -0.008839935049  0.003687585852
 -0.007602093740  0.503632303338  0.431203211157 -0.238273180062  0.095471002867
 -0.000655845650  0.534061703602  0.582641871811 -0.363867201438  0.150227195985
  0.000523977790  0.095857190467 -0.464940275277  0.457441888212 -0.208738150416
 -0.000298543854 -0.014771637422 -0.818861009060  0.986636074654 -0.475253210213
  0.000144190955  0.005047904707 -0.115530382964 -0.614306667079  0.432145870484
 -0.000076426293 -0.002356338000  0.014455219460 -0.857247909552  0.774502001800
  0.000025280687  0.000735567253 -0.003857040287 -0.057477264834 -0.701463237811
 -0.000011435666 -0.000345094410  0.001797958323  0.013021596036 -0.655239818249
  0.000002915318  0.000087034002 -0.000427016653 -0.002461482107 -0.001480390438
 -0.000001435856 -0.000040213128  0.000196253939  0.001145039852  0.005932818680
   23    4    6    6    6    6
  710.2065851      157.2221653      29.12160898      2.417973454    
  55602773.00      7765745.900      1589584.300      401810.9500    
  118603.3400      39300.00000      14430.35400      5793.124600    
  2497.821500      1143.717300      551.3977100      277.7501400    
  145.0303300      77.44745600      41.75015500      23.22694800    
  12.93638700      7.026064900      3.744504700      1.899190800    
 0.9146347400     0.4226736900     0.1733363600    
 -0.000001787486  0.000000941646  0.000000369673  0.000000210146
 -0.000029778280  0.000014803242  0.000007475628  0.000002208136
 -0.000077473699  0.000039657016  0.000017830862  0.000007396248
 -0.000219006617  0.000109128664  0.000055186503  0.000016206753
 -0.000590314257  0.000299796594  0.000141846954  0.000052243883
 -0.001617918203  0.000820946407  0.000396169037  0.000137351936
 -0.004448877099  0.002272303445  0.001092134107  0.000385287076
 -0.012330231588  0.006350260291  0.003064257800  0.001074527370
 -0.033632795128  0.017577827270  0.008499406206  0.002995201182
 -0.085361656537  0.045767186164  0.022289998836  0.007832451058
 -0.184634873240  0.103020055956  0.050574538075  0.017890890378
 -0.306178384669  0.179922237713  0.089737180998  0.031620850035
 -0.333940583348  0.192210067712  0.094507604019  0.033678906918
 -0.191850085508 -0.015580183711 -0.030487478891 -0.013344200442
 -0.041369778383 -0.389529362353 -0.292137792060 -0.110384496569
 -0.001846250416 -0.478691757667 -0.385622347769 -0.153326694704
 -0.000145652622 -0.202678556089  0.045195557534  0.049017081774
  0.000133664297 -0.026107523059  0.546137132901  0.272812405009
  0.000015746058 -0.001459505517  0.482008814819  0.306313924121
  0.000006040285 -0.000165612849  0.118275937474 -0.132904061327
 -0.000001375685 -0.000003966157  0.003793282647 -0.520103926355
  0.000000039447  0.000004772445  0.001401357095 -0.515855817200
  0.000000072413 -0.000004889826 -0.000457545047 -0.024369498146
   15    2   10   10
  121.0434883      15.88510197    
  16241.49300      4278.988200      1524.597100      640.8577100    
  295.5655200      143.5265800      71.89617500      36.65707500    
  18.88423700      9.510456800      4.620822600      2.112008600    
 0.7516843600     0.2514027000     0.7547191500E-01
  0.000085227910  0.000041409945
  0.000604051311  0.000295458388
  0.003323691303  0.001623954489
  0.014681189609  0.007257067743
  0.052573806266  0.026160282596
  0.148496089137  0.075638355900
  0.301129890468  0.152371237446
  0.388472857018  0.180768247644
  0.249911873181 -0.020931729076
  0.059008037994 -0.385959687145
  0.003152881546 -0.487175223342
  0.000572924915 -0.223591953497
 -0.000003387534 -0.021293172058
  0.000021559942  0.001560508109
 -0.000006327039 -0.000322913381
   10    1   14
  1.227374644    
  1573.111300      295.9291500      108.3458800      47.08844000    
  21.82595400      10.48002400      4.988653200      2.304761500    
 0.9995225700     0.3810215700    
 -0.000091146849
 -0.002175035704
 -0.015333652529
 -0.061822105180
 -0.166134043965
 -0.288170048049
 -0.342964997608
 -0.296639091789
 -0.187447186523
 -0.063278531119
*
Spectral Representation Operator
Core primitive basis
Exchange
End of Spectral Representation Operator
 

/Ga.ECP.Seijo.0s.0s.0e-AIMP-Lu3Ga5O12-Ga(oct).      
Embedding AIMP of Gao(3+) in Lu3Ga5O12 
made Tue.Feb.21.00:07:22.CET.2012
   3.000    0
    0    0
*
* External AIMP: 
* Local Pot. Param. : (ECP convention)
*                      A(AIMP)=-Zeff*A(ECP)
*
M1
   13
  400690.0000      66638.00000      16582.00000      4839.300000    
  1596.100000      573.6100000      202.2700000      77.08400000    
  34.89600000      10.40990000      4.788900000      2.105800000    
 0.8569800000    
 0.7133058024E-01 0.8050844311E-01 0.1437258542     0.2473593716    
 0.4009211188     0.5288462078     0.6380648399      1.246838178    
  1.162926591      1.231012030      2.305210024      1.115598072    
 0.1609920228    
M2
    0
COREREP
   1.000
PROJOP
    2
   20    3    2    2    2
  755.8938585      95.91891266      12.48871917    
  70959040.00      7603324.000      1319240.000      302670.5000    
  83251.81000      25933.12000      8976.547000      3372.096000    
  1348.620000      567.5549000      248.1887000      111.6749000    
  49.24165000      23.27517000      11.08148000      4.899352000    
  2.300821000      1.026582000     0.2092229000     0.7348584000E-01
  0.000013491980 -0.000004279725 -0.000001668288
  0.000131163489 -0.000043089087 -0.000017180220
  0.000530468701 -0.000171733736 -0.000067787040
 -0.000311934842  0.000104662139  0.000042483830
  0.001402143046 -0.000441490016 -0.000170359527
  0.003678574789 -0.001145097533 -0.000435675573
  0.013499437762 -0.004243407440 -0.001623462892
  0.040090968620 -0.012868247172 -0.004924275301
  0.106443056011 -0.035722968411 -0.013776679684
  0.232114764194 -0.086623097590 -0.033765022541
  0.364365328611 -0.169075816425 -0.068074039479
  0.307543332250 -0.210083073181 -0.088986056084
  0.080427666733  0.026406087382  0.011618951776
 -0.002091695793  0.532872149159  0.332728732165
  0.003318222824  0.503070708020  0.468445159393
 -0.001366689581  0.088517253379 -0.174396850457
  0.000410491850 -0.001291224784 -0.725225276724
 -0.000328348076  0.002319815976 -0.376745324687
  0.000091743700 -0.000306706225 -0.012210756065
  0.000007674973 -0.000094730116  0.007848889440
   15    2    6    6
  84.74412748      8.708442063    
  49597.56000      8521.695000      2303.899000      783.0395000    
  305.5494000      131.1653000      60.06042000      28.47848000    
  13.71275000      6.359916000      2.903849000      1.270245000    
 0.4810799000     0.1528591000     0.4856343000E-01
  0.000016436688 -0.000006204842
  0.000246402765 -0.000093679934
  0.001889026220 -0.000716070139
  0.009964992531 -0.003823222817
  0.039612537551 -0.015359776786
  0.119508754486 -0.048148407219
  0.263338666904 -0.110438225364
  0.386818444704 -0.174963780891
  0.293029304347 -0.095741937022
  0.071897989229  0.248063945549
  0.001982050999  0.516949979086
  0.001435616442  0.353052068792
 -0.000191352057  0.048764660997
  0.000068791243 -0.007529225751
 -0.000029802515 -0.000153135487
    9    1   10
  2.131462092    
  457.9123000      128.5433000      48.13583000      20.16190000    
  9.037338000      4.122069000      1.835645000     0.7793226000    
 0.2999676000    
 -0.000572787223
 -0.005772656669
 -0.029838995975
 -0.099710524226
 -0.223471838796
 -0.332804941820
 -0.346386902915
 -0.240997625789
 -0.054740722995
*
Spectral Representation Operator
Core primitive basis
Exchange
End of Spectral Representation Operator
 

/Ga.ECP.Seijo.0s.0s.0e-AIMP-Lu3Ga5O12-Ga(tet).      
Embedding AIMP of Gat(3+) in Lu3Ga5O12 
made Tue.Feb.21.00:18:44.CET.2012
   3.000    0
    0    0
*
* External AIMP: 
* Local Pot. Param. : (ECP convention)
*                      A(AIMP)=-Zeff*A(ECP)
*
M1
   13
  400730.0000      66675.00000      16583.00000      4837.000000    
  1595.900000      573.6400000      202.2000000      77.03100000    
  34.86400000      10.38490000      4.774900000      2.094900000    
 0.8445800000    
 0.7131611149E-01 0.8047925358E-01 0.1438136082     0.2474162358    
 0.4007719846     0.5288901701     0.6384899464      1.247875145    
  1.162145165      1.237102610      2.306654611      1.109953134    
 0.1584253585    
M2
    0
COREREP
   1.000
PROJOP
    2
   20    3    2    2    2
  756.0306840      96.05617732      12.62071667    
  70959040.00      7603324.000      1319240.000      302670.5000    
  83251.81000      25933.12000      8976.547000      3372.096000    
  1348.620000      567.5549000      248.1887000      111.6749000    
  49.24165000      23.27517000      11.08148000      4.899352000    
  2.300821000      1.026582000     0.2092229000     0.7348584000E-01
  0.000013491979 -0.000004279738 -0.000001668483
  0.000131163478 -0.000043089192 -0.000017183156
  0.000530468662 -0.000171734207 -0.000067796317
 -0.000311934856  0.000104662349  0.000042486433
  0.001402142729 -0.000441492644 -0.000170382983
  0.003678574105 -0.001145100039 -0.000435802918
  0.013499433513 -0.004243442502 -0.001623641853
  0.040090961962 -0.012868260018 -0.004925827394
  0.106443013690 -0.035723316006 -0.013777649248
  0.232114720911 -0.086622994158 -0.033777600097
  0.364365063383 -0.169078069822 -0.068072051365
  0.307543488849 -0.210080431761 -0.089046237711
  0.080427749256  0.026394700250  0.011730794931
 -0.002091042169  0.532900916844  0.332547164039
  0.003317205649  0.503040845653  0.469115547073
 -0.001365316361  0.088564262111 -0.175629046206
  0.000408736376 -0.001374120521 -0.723825879407
 -0.000326919143  0.002389945847 -0.378196302925
  0.000090790509 -0.000357364038 -0.010607035070
  0.000007868709 -0.000084409094  0.007397200537
   15    2    6    6
  84.88133377      8.840454544    
  49597.56000      8521.695000      2303.899000      783.0395000    
  305.5494000      131.1653000      60.06042000      28.47848000    
  13.71275000      6.359916000      2.903849000      1.270245000    
 0.4810799000     0.1528591000     0.4856343000E-01
  0.000016436737 -0.000006206304
  0.000246404118 -0.000093688295
  0.001889032254 -0.000716227159
  0.009965044502 -0.003823598031
  0.039612654106 -0.015363157151
  0.119509336421 -0.048152835397
  0.263339292486 -0.110466175609
  0.386823778437 -0.174970357065
  0.293028755509 -0.095810235979
  0.071892440391  0.248280189456
  0.001973924750  0.516883054876
  0.001440114478  0.353114028831
 -0.000195243174  0.048518387354
  0.000067935846 -0.007635734441
 -0.000028725602  0.000421758023
    9    1   10
  2.264373222    
  457.9123000      128.5433000      48.13583000      20.16190000    
  9.037338000      4.122069000      1.835645000     0.7793226000    
 0.2999676000    
 -0.000572730827
 -0.005771221084
 -0.029835429752
 -0.099686399110
 -0.223458168905
 -0.332682813623
 -0.346319356255
 -0.240183907131
 -0.056832415269
*
Spectral Representation Operator
Core primitive basis
Exchange
End of Spectral Representation Operator
 

/Ga.ECP.Seijo.20s15p9d.1s1p1d.0e-AIMP-Lu3Ga5O12-Ga(tet).      
Embedding AIMP of Gat(3+) in Lu3Ga5O12 with orthogonality orbitals
made Tue.Feb.21.00:18:44.CET.2012
   3.000    2
   20    1
  70959040.00      7603324.000      1319240.000      302670.5000    
  83251.81000      25933.12000      8976.547000      3372.096000    
  1348.620000      567.5549000      248.1887000      111.6749000    
  49.24165000      23.27517000      11.08148000      4.899352000    
  2.300821000      1.026582000     0.2092229000     0.7348584000E-01
  -0.000001668483
  -0.000017183156
  -0.000067796317
   0.000042486433
  -0.000170382983
  -0.000435802918
  -0.001623641853
  -0.004925827394
  -0.013777649248
  -0.033777600097
  -0.068072051365
  -0.089046237711
   0.011730794931
   0.332547164039
   0.469115547073
  -0.175629046206
  -0.723825879407
  -0.378196302925
  -0.010607035070
   0.007397200537
   15    1
  49597.56000      8521.695000      2303.899000      783.0395000    
  305.5494000      131.1653000      60.06042000      28.47848000    
  13.71275000      6.359916000      2.903849000      1.270245000    
 0.4810799000     0.1528591000     0.4856343000E-01
  -0.000006206304
  -0.000093688295
  -0.000716227159
  -0.003823598031
  -0.015363157151
  -0.048152835397
  -0.110466175609
  -0.174970357065
  -0.095810235979
   0.248280189456
   0.516883054876
   0.353114028831
   0.048518387354
  -0.007635734441
   0.000421758023
    9    1
  457.9123000      128.5433000      48.13583000      20.16190000    
  9.037338000      4.122069000      1.835645000     0.7793226000    
 0.2999676000    
 -0.000572730827
 -0.005771221084
 -0.029835429752
 -0.099686399110
 -0.223458168905
 -0.332682813623
 -0.346319356255
 -0.240183907131
 -0.056832415269
*
* External AIMP: 
* Local Pot. Param. : (ECP convention)
*                      A(AIMP)=-Zeff*A(ECP)
*
M1
   13
  400730.0000      66675.00000      16583.00000      4837.000000    
  1595.900000      573.6400000      202.2000000      77.03100000    
  34.86400000      10.38490000      4.774900000      2.094900000    
 0.8445800000    
 0.7131611149E-01 0.8047925358E-01 0.1438136082     0.2474162358    
 0.4007719846     0.5288901701     0.6384899464      1.247875145    
  1.162145165      1.237102610      2.306654611      1.109953134    
 0.1584253585    
M2
    0
COREREP
   1.000
PROJOP
    2
   20    3    2    2    2
  756.0306840      96.05617732      12.62071667    
  70959040.00      7603324.000      1319240.000      302670.5000    
  83251.81000      25933.12000      8976.547000      3372.096000    
  1348.620000      567.5549000      248.1887000      111.6749000    
  49.24165000      23.27517000      11.08148000      4.899352000    
  2.300821000      1.026582000     0.2092229000     0.7348584000E-01
  0.000013491979 -0.000004279738 -0.000001668483
  0.000131163478 -0.000043089192 -0.000017183156
  0.000530468662 -0.000171734207 -0.000067796317
 -0.000311934856  0.000104662349  0.000042486433
  0.001402142729 -0.000441492644 -0.000170382983
  0.003678574105 -0.001145100039 -0.000435802918
  0.013499433513 -0.004243442502 -0.001623641853
  0.040090961962 -0.012868260018 -0.004925827394
  0.106443013690 -0.035723316006 -0.013777649248
  0.232114720911 -0.086622994158 -0.033777600097
  0.364365063383 -0.169078069822 -0.068072051365
  0.307543488849 -0.210080431761 -0.089046237711
  0.080427749256  0.026394700250  0.011730794931
 -0.002091042169  0.532900916844  0.332547164039
  0.003317205649  0.503040845653  0.469115547073
 -0.001365316361  0.088564262111 -0.175629046206
  0.000408736376 -0.001374120521 -0.723825879407
 -0.000326919143  0.002389945847 -0.378196302925
  0.000090790509 -0.000357364038 -0.010607035070
  0.000007868709 -0.000084409094  0.007397200537
   15    2    6    6
  84.88133377      8.840454544    
  49597.56000      8521.695000      2303.899000      783.0395000    
  305.5494000      131.1653000      60.06042000      28.47848000    
  13.71275000      6.359916000      2.903849000      1.270245000    
 0.4810799000     0.1528591000     0.4856343000E-01
  0.000016436737 -0.000006206304
  0.000246404118 -0.000093688295
  0.001889032254 -0.000716227159
  0.009965044502 -0.003823598031
  0.039612654106 -0.015363157151
  0.119509336421 -0.048152835397
  0.263339292486 -0.110466175609
  0.386823778437 -0.174970357065
  0.293028755509 -0.095810235979
  0.071892440391  0.248280189456
  0.001973924750  0.516883054876
  0.001440114478  0.353114028831
 -0.000195243174  0.048518387354
  0.000067935846 -0.007635734441
 -0.000028725602  0.000421758023
    9    1   10
  2.264373222    
  457.9123000      128.5433000      48.13583000      20.16190000    
  9.037338000      4.122069000      1.835645000     0.7793226000    
 0.2999676000    
 -0.000572730827
 -0.005771221084
 -0.029835429752
 -0.099686399110
 -0.223458168905
 -0.332682813623
 -0.346319356255
 -0.240183907131
 -0.056832415269
*
Spectral Representation Operator
Core primitive basis
Exchange
End of Spectral Representation Operator
 

/O.ECP.Seijo.0s.0s.0e-AIMP-Lu3Ga5O12-O.         
Embedding AIMP of O(2-) in Lu3Ga5O12 
made Tue.Feb.21.00:28:56.CET.2012
  -2.000    0
    0    0
*
* External AIMP: 
* Local Pot. Param. : (ECP convention)
*                      A(AIMP)=-Zeff*A(ECP)
*
M1
   12
  282885.8300      34740.01200      6502.573000      1486.426000    
  406.8273300      124.8370000      41.98461900      13.81633000    
  4.272136000      1.610321600     0.6078900000     0.2644720000    
 -.2176236329E-01 -.3181279124E-01 -.6528299593E-01 -.1219019565    
 -.2183040340     -.3841958653     -.5097777422     -.4598589082    
 -.7569349019     -1.303128409     -1.059077120     -.6796291221E-01
M2
    0
COREREP
   1.000
PROJOP
    1
    8    2    2    2
  40.32279200      1.970580503    
  2048.050000      309.0990000      70.41410000      19.70120000    
  6.031450000      10.22970000     0.9340900000     0.2862500000    
  0.006202003391  0.001317047811
  0.045638971412  0.009587059270
  0.200054782537  0.046707348476
  0.473798951933  0.114442480875
  0.380735339336  0.097920434372
  0.028990657889  0.069573318491
  0.024663311154 -0.461841746546
 -0.005638938379 -0.642417956738
    6    1    6
 0.5111446635    
  34.97120000      7.845090000      2.303320000     0.7219800000    
 0.2155300000     0.5900000000E-01
 -0.013146643260
 -0.085350458599
 -0.248718247645
 -0.436635713902
 -0.511767642321
  0.094855873923
*
Spectral Representation Operator
Core primitive basis
Exchange
End of Spectral Representation Operator
 
 
********************************************************************************
*         E.7.X. Mg3Al2Si3O12 (Pyrope)
********************************************************************************
*           E.7.X.a. Mg3Al2Si3O12
*             Structure:
*                    J.Ganguly et al., American Mineralogist 78 (1993) 583-593
*                    (Ia-3d; a=11.4566A, x=-0.0329, =0.0501, z=0.1528)
*             Embedding potentials:
*                    L.Seijo, Z.Barandiaran, to be published
*                    Out of SCEI DKH-HF calculations
*             /Mg.ECP.Seijo.0s.0s.0e-AIMP-Mg3Al2Si3O12-Mg.
*             /Al.ECP.Seijo.0s.0s.0e-AIMP-Mg3Al2Si3O12-Al(oct).
*             /Si.ECP.Seijo.0s.0s.0e-AIMP-Mg3Al2Si3O12-Si(tet).
*             /Si.ECP.Seijo.16s11p.1s1p.0e-AIMP-Mg3Al2Si3O12-Si(tet).
*             /O.ECP.Seijo.0s.0s.0e-AIMP-Mg3Al2Si3O12-O.
********************************************************************************
/Mg.ECP.Seijo.0s.0s.0e-AIMP-Mg3Al2Si3O12-Mg.     
Embedding AIMP of Mg(2+) in Pyrope
made Mon.Feb.20.22:22:10.CET.2012
   2.000    0
    0    0
*
* External AIMP: 
* Local Pot. Param. : (ECP convention)
*                      A(AIMP)=-Zeff*A(ECP)
*
M1
   13
  412320.0000      68483.00000      16627.00000      4682.600000    
  1498.300000      527.4700000      201.4600000      81.74000000    
  32.27600000      12.38320000      5.592200000      2.678500000    
  1.292640000    
 0.2812707867E-01 0.3191433903E-01 0.5797739444E-01 0.9893253596E-01
 0.1639041124     0.2676865450     0.4023131739     0.4738078803    
 0.4426736902     0.7594791484      1.189740136     0.8841038874    
 0.1993400788    
M2
    0
COREREP
   1.000
PROJOP
    1
   16    2    2    2
  97.98588909      7.273535108    
  1694068.000      192336.9000      39966.58000      10658.15000    
  3203.178000      1064.467000      385.2409000      149.6694000    
  61.39625000      26.30771000      11.48114000      4.164014000    
  1.753899000     0.7137424000     0.1131305000     0.4072101000E-01
 -0.000001411768 -0.000000606195
 -0.000186592765 -0.000047163906
 -0.000489946505 -0.000124309235
 -0.001669892010 -0.000424771293
 -0.005687148327 -0.001447727198
 -0.018912858843 -0.004876658649
 -0.056922082493 -0.014945232594
 -0.146417696366 -0.040842537704
 -0.294806938184 -0.092161640413
 -0.383378551759 -0.160947533125
 -0.223252043387 -0.132334582343
 -0.025285323306  0.220683379581
  0.002153181169  0.577103097573
 -0.001170813540  0.358194895651
  0.000228488274  0.001315738755
 -0.000088911526 -0.003420000738
   11    1    6
  4.293130115    
  1213.444000      274.6633000      87.11188000      32.75345000    
  13.63020000      6.039718000      2.745523000      1.238350000    
 0.9013199000     0.5851599000     0.2300177000    
 -0.000248215232
 -0.002072510560
 -0.010895371946
 -0.041616847369
 -0.116805727042
 -0.240995252991
 -0.331835127759
 -0.399857462594
  0.129215145855
 -0.225500825567
  0.009313845506
*
Spectral Representation Operator
Core primitive basis
Exchange
End of Spectral Representation Operator
 

/Al.ECP.Seijo.0s.0s.0e-AIMP-Mg3Al2Si3O12-Al(oct).    
Embedding AIMP of Alo(3+) in Pyrope
made Mon.Feb.20.22:31:42.CET.2012
   3.000    0
    0    0
*
* External AIMP: 
* Local Pot. Param. : (ECP convention)
*                      A(AIMP)=-Zeff*A(ECP)
*
M1
   12
  372971.1700      57385.37550      13169.30800      3619.437590    
  1148.006930      394.6778150      149.5069970      60.26483830    
  23.41066380      9.773332000      4.340800000      1.918320000    
 0.2196358845E-01 0.2668647377E-01 0.4921206291E-01 0.8344924586E-01
 0.1417013962     0.2354433806     0.3173050955     0.3073169964    
 0.3534101956     0.7542523661     0.8272793926     0.2153131393    
M2
    0
COREREP
   1.000
PROJOP
    1
   11    2    2    2
  116.7084642      9.459996266    
  5908.580000      885.1210000      200.7280000      56.13320000    
  17.16260000      29.59110000      2.997320000      1.069540000    
  1.307260000     0.1651860000     0.6055000000E-01
  0.005666351119  0.001487840622
  0.042199093179  0.011045751545
  0.190347944822  0.054825372879
  0.462101675941  0.145002592899
  0.382410062902  0.139959156514
  0.043232232444  0.072618630352
  0.051316847595 -0.609577397595
  0.066822230707 -0.574388995916
 -0.089537859331  0.062050368263
 -0.002730230891  0.001008559002
  0.001037001394  0.007581280990
    8    1    6
  6.111719382    
  122.4420000      28.65160000      8.855250000      2.980410000    
  1.001540000     0.3105050000     0.1124240000     0.4102600000E-01
  0.013946350431
  0.091702909795
  0.297644301119
  0.499781491632
  0.313437867231
  0.010447282420
 -0.011322498502
  0.002042158558
*
Spectral Representation Operator
Core primitive basis
Exchange
End of Spectral Representation Operator
 

/Si.ECP.Seijo.0s.0s.0e-AIMP-Mg3Al2Si3O12-Si(tet).    
Embedding AIMP of Sit(4+) in Pyrope
made Mon.Feb.20.22:42:04.CET.2012
   4.000    0
    0    0
*
* External AIMP: 
* Local Pot. Param. : (ECP convention)
*                      A(AIMP)=-Zeff*A(ECP)
*
M1
   12
  387934.1700      61523.17550      14482.20800      4037.907590    
  1287.286930      452.2388150      172.1239970      67.24303830    
  23.86456380      9.879262000      4.576520000      2.232440000    
 0.1756560362E-01 0.2072940550E-01 0.3788208447E-01 0.6459489312E-01
 0.1085087904     0.1765277098     0.2451967134     0.2467722057    
 0.3349634114     0.6352117683     0.5117046920     0.1003427222    
M2
    0
COREREP
   1.000
PROJOP
    1
   16    2    2    2
  138.0528618      12.55120237    
  1453205.000      183024.6000      37505.20000      9899.251000    
  3067.379000      1068.804000      406.1585000      164.8768000    
  70.46529000      31.35984000      14.24023000      5.516831000    
  2.457151000      1.099921000     0.2572950000     0.9153216000E-01
 -0.000039098668  0.000010897253
 -0.000053217888  0.000013908415
 -0.000449388973  0.000120139996
 -0.001979101361  0.000529573156
 -0.007581483142  0.002034988275
 -0.024909348996  0.006780174319
 -0.071381827131  0.019959237010
 -0.171135183129  0.051352385211
 -0.314706788747  0.108751109169
 -0.361814657915  0.172695855609
 -0.180652875285  0.112189096789
 -0.018742868955 -0.270841986679
  0.001462345620 -0.567467942001
 -0.001062727759 -0.325674796637
  0.000310288704  0.002244934787
  0.000006593829  0.010127278571
   11    1    6
  8.806286353    
  1761.450000      352.2744000      103.8381000      36.92634000    
  14.69441000      6.229335000      2.705822000      1.176912000    
 0.4186666000     0.1604789000     0.5929782000E-01
 -0.000231178526
 -0.002626187522
 -0.015854400689
 -0.064188654571
 -0.180393421414
 -0.333194200630
 -0.391466456353
 -0.214646028731
 -0.021773984267
  0.013763194864
 -0.001925670327
*
Spectral Representation Operator
Core primitive basis
Exchange
End of Spectral Representation Operator
 

/Si.ECP.Seijo.16s11p.1s1p.0e-AIMP-Mg3Al2Si3O12-Si(tet).    
Embedding AIMP of Sit(4+) in Pyrope with orthogonality orbitals
made Mon.Feb.20.22:42:04.CET.2012
   4.000    1
   16    1
  1453205.000      183024.6000      37505.20000      9899.251000    
  3067.379000      1068.804000      406.1585000      164.8768000    
  70.46529000      31.35984000      14.24023000      5.516831000    
  2.457151000      1.099921000     0.2572950000     0.9153216000E-01
   0.000010897253
   0.000013908415
   0.000120139996
   0.000529573156
   0.002034988275
   0.006780174319
   0.019959237010
   0.051352385211
   0.108751109169
   0.172695855609
   0.112189096789
  -0.270841986679
  -0.567467942001
  -0.325674796637
   0.002244934787
   0.010127278571
   11    1 
  1761.450000      352.2744000      103.8381000      36.92634000    
  14.69441000      6.229335000      2.705822000      1.176912000    
 0.4186666000     0.1604789000     0.5929782000E-01
 -0.000231178526
 -0.002626187522
 -0.015854400689
 -0.064188654571
 -0.180393421414
 -0.333194200630
 -0.391466456353
 -0.214646028731
 -0.021773984267
  0.013763194864
 -0.001925670327
*
* External AIMP: 
* Local Pot. Param. : (ECP convention)
*                      A(AIMP)=-Zeff*A(ECP)
*
M1
   12
  387934.1700      61523.17550      14482.20800      4037.907590    
  1287.286930      452.2388150      172.1239970      67.24303830    
  23.86456380      9.879262000      4.576520000      2.232440000    
 0.1756560362E-01 0.2072940550E-01 0.3788208447E-01 0.6459489312E-01
 0.1085087904     0.1765277098     0.2451967134     0.2467722057    
 0.3349634114     0.6352117683     0.5117046920     0.1003427222    
M2
    0
COREREP
   1.000
PROJOP
    1
   16    2    2    2
  138.0528618      12.55120237    
  1453205.000      183024.6000      37505.20000      9899.251000    
  3067.379000      1068.804000      406.1585000      164.8768000    
  70.46529000      31.35984000      14.24023000      5.516831000    
  2.457151000      1.099921000     0.2572950000     0.9153216000E-01
 -0.000039098668  0.000010897253
 -0.000053217888  0.000013908415
 -0.000449388973  0.000120139996
 -0.001979101361  0.000529573156
 -0.007581483142  0.002034988275
 -0.024909348996  0.006780174319
 -0.071381827131  0.019959237010
 -0.171135183129  0.051352385211
 -0.314706788747  0.108751109169
 -0.361814657915  0.172695855609
 -0.180652875285  0.112189096789
 -0.018742868955 -0.270841986679
  0.001462345620 -0.567467942001
 -0.001062727759 -0.325674796637
  0.000310288704  0.002244934787
  0.000006593829  0.010127278571
   11    1    6
  8.806286353    
  1761.450000      352.2744000      103.8381000      36.92634000    
  14.69441000      6.229335000      2.705822000      1.176912000    
 0.4186666000     0.1604789000     0.5929782000E-01
 -0.000231178526
 -0.002626187522
 -0.015854400689
 -0.064188654571
 -0.180393421414
 -0.333194200630
 -0.391466456353
 -0.214646028731
 -0.021773984267
  0.013763194864
 -0.001925670327
*
Spectral Representation Operator
Core primitive basis
Exchange
End of Spectral Representation Operator
 

/O.ECP.Seijo.0s.0s.0e-AIMP-Mg3Al2Si3O12-O.       
Embedding AIMP of O(2-) in Pyrope
made Mon.Feb.20.22:52:05.CET.2012
  -2.000    0
    0    0
*
* External AIMP: 
* Local Pot. Param. : (ECP convention)
*                      A(AIMP)=-Zeff*A(ECP)
*
M1
   12
  282885.8300      34740.01200      6502.573000      1486.426000    
  406.8273300      124.8370000      41.98461900      13.81633000    
  4.272136000      1.610321600     0.6078900000     0.2644720000    
 -.2175675953E-01 -.3195264404E-01 -.6527950203E-01 -.1222926599    
 -.2183220359     -.3853151655     -.5097399778     -.4637102205    
 -.7539627220     -1.332107201     -1.036832089     -.5872902303E-01
M2
    0
COREREP
   1.000
PROJOP
    1
    8    2    2    2
  40.59667984      2.314636588    
  2048.050000      309.0990000      70.41410000      19.70120000    
  6.031450000      10.22970000     0.9340900000     0.2862500000    
  0.006201587984  0.001316099586
  0.045637093574  0.009611705763
  0.200035819389  0.046557685446
  0.473816287449  0.116095007871
  0.380938041203  0.103669196940
  0.028784661478  0.064178114085
  0.024669901545 -0.466388849840
 -0.005557759910 -0.639110736455
    6    1    6
 0.8075206287    
  34.97120000      7.845090000      2.303320000     0.7219800000    
 0.2155300000     0.5900000000E-01
 -0.013122476452
 -0.086143017113
 -0.246341611215
 -0.452626749259
 -0.489399368815
  0.081662319567
*
Spectral Representation Operator
Core primitive basis
Exchange
End of Spectral Representation Operator
 
 
********************************************************************************
*         E.7.X. Ca3Al2Si3O12 (Grossular)
********************************************************************************
*           E.7.X.a. Ca3Al2Si3O12
*             Structure:
*                    J.Ganguly et al., American Mineralogist 78 (1993) 583-593
*                    (Ia-3d; a=11.8515A, x=-0.0376, =0.0454, z=0.1513)
*             Embedding potentials:
*                    L.Seijo, Z.Barandiaran, to be published
*                    Out of SCEI DKH-HF calculations
*             /Ca.ECP.Seijo.0s.0s.0e-AIMP-Ca3Al2Si3O12-Ca.
*             /Al.ECP.Seijo.0s.0s.0e-AIMP-Ca3Al2Si3O12-Al(oct).
*             /Si.ECP.Seijo.0s.0s.0e-AIMP-Ca3Al2Si3O12-Si(tet).
*             /Si.ECP.Seijo.16s11p.1s1p.0e-AIMP-Ca3Al2Si3O12-Si(tet).
*             /O.ECP.Seijo.0s.0s.0e-AIMP-Ca3Al2Si3O12-O.
********************************************************************************
/Ca.ECP.Seijo.0s.0s.0e-AIMP-Ca3Al2Si3O12-Ca.  
Embedding AIMP of Ca(2+) in Grossular
made Tue.Feb.21.22:40:22.CET.2012
   2.000    0
    0    0
*
* External AIMP: 
* Local Pot. Param. : (ECP convention)
*                      A(AIMP)=-Zeff*A(ECP)
*
M1
   14
  386350.0000      61202.00000      14665.00000      4156.700000    
  1335.400000      474.4300000      178.8000000      63.68600000    
  25.98500000      12.28430000      3.308300000      1.667500000    
 0.8513800000     0.4439000000    
 0.6024166698E-01 0.7085825078E-01 0.1271338019     0.2196900779    
 0.3675181050     0.5540687981     0.6354429828     0.7967195668    
  1.546930236      1.311199086     0.6788547270      1.696990876    
 0.8978432048     0.3650862062E-01
M2
    0
COREREP
   1.000
PROJOP
    1
   20    3    2    2    2
  299.4827233      33.18213847      3.758210241    
  15429060.00      1717766.000      325290.8000      83104.29000    
  25219.11000      8662.800000      3220.967000      1283.738000    
  543.4592000      240.8390000      109.9677000      51.34453000    
  24.28419000      10.50093000      4.922923000      2.340607000    
 0.9214525000     0.3826710000     0.6533290000E-01 0.2618455000E-01
 -0.000027810227 -0.000008190329 -0.000002790034
 -0.000115765886 -0.000033740843 -0.000011831932
 -0.000336266174 -0.000098686855 -0.000033823427
 -0.000900926606 -0.000264431137 -0.000091367894
 -0.002361578501 -0.000694273036 -0.000238810215
 -0.006274386683 -0.001856490870 -0.000642443621
 -0.017042366381 -0.005074910926 -0.001744749802
 -0.044365303899 -0.013531689549 -0.004708046190
 -0.105346251863 -0.033385852591 -0.011523904317
 -0.214806007949 -0.075063470827 -0.026584548823
 -0.335646271753 -0.140368055483 -0.049717807796
 -0.309851826257 -0.186539130949 -0.071181823688
 -0.112211350477 -0.043744452863 -0.014051993921
 -0.007663371968  0.400520974754  0.181639565196
 -0.000347887872  0.569368094600  0.442602395661
  0.000033763313  0.176334509111  0.097726586615
  0.000044459414  0.007776041520 -0.689503578638
  0.000013227902  0.000688272206 -0.547563692115
  0.000001063461 -0.000160980616  0.004415603180
 -0.000000680645  0.000070505702  0.002974576322
   15    2    6    6
  26.53562718      1.920145691    
  51912.48000      8887.833000      2423.370000      833.8344000    
  329.6573000      142.4756000      65.46554000      31.43317000    
  15.49410000      7.765115000      3.924985000      1.924370000    
 0.9138395000     0.4202105000     0.1757597000    
 -0.000014571396 -0.000004788871
 -0.000084901330 -0.000027631885
 -0.000435547247 -0.000144245552
 -0.001990461751 -0.000647598834
 -0.007867999457 -0.002626118692
 -0.026522272807 -0.008747840243
 -0.075265906065 -0.025894159515
 -0.171403215278 -0.059279267118
 -0.294463964204 -0.108860076708
 -0.349416179814 -0.131186208406
 -0.222266113329 -0.065017761423
 -0.049849789350  0.232970179611
 -0.001396364049  0.438505826524
 -0.000685292889  0.436522407537
 -0.000227932017  0.041386188361
*
Spectral Representation Operator
Core primitive basis
Exchange
End of Spectral Representation Operator
 

/Al.ECP.Seijo.0s.0s.0e-AIMP-Ca3Al2Si3O12-Al(oct). 
Embedding AIMP of Alo(3+) in Grossular
made Tue.Feb.21.22:49:43.CET.2012
   3.000    0
    0    0
*
* External AIMP: 
* Local Pot. Param. : (ECP convention)
*                      A(AIMP)=-Zeff*A(ECP)
*
M1
   12
  372971.1700      57385.37550      13169.30800      3619.437590    
  1148.006930      394.6778150      149.5069970      60.26483830    
  23.41066380      9.773332000      4.340800000      1.918320000    
 0.2198440796E-01 0.2664601578E-01 0.4917935249E-01 0.8352642907E-01
 0.1414241923     0.2358639232     0.3163076312     0.3087672933    
 0.3505000841     0.7584171877     0.8200414462     0.2206753699    
M2
    0
COREREP
   1.000
PROJOP
    1
   11    2    2    2
  116.9554580      9.706448037    
  5908.580000      885.1210000      200.7280000      56.13320000    
  17.16260000      29.59110000      2.997320000      1.069540000    
  1.307260000     0.1651860000     0.6055000000E-01
  0.005666372084  0.001486569470
  0.042199411132  0.011031005118
  0.190348441753  0.054796891503
  0.462111997565  0.144557080289
  0.382431590272  0.138688964462
  0.043212491459  0.073499678236
  0.051215513934 -0.603932017424
  0.066211333855 -0.529446132774
 -0.088906038732  0.019308297155
 -0.002572160460 -0.014638871064
  0.000988025335  0.011745282150
    8    1    6
  6.350654149    
  122.4420000      28.65160000      8.855250000      2.980410000    
  1.001540000     0.3105050000     0.1124240000     0.4102600000E-01
 -0.013940003069
 -0.091714799472
 -0.297453278953
 -0.500130017892
 -0.311247955739
 -0.012512339493
  0.005356023242
  0.000558801163
*
Spectral Representation Operator
Core primitive basis
Exchange
End of Spectral Representation Operator
 

/Si.ECP.Seijo.0s.0s.0e-AIMP-Ca3Al2Si3O12-Si(tet). 
Embedding AIMP of Si(4+) in Grossular
made Tue.Feb.21.23:00:05.CET.2012
   4.000    0
    0    0
*
* External AIMP: 
* Local Pot. Param. : (ECP convention)
*                      A(AIMP)=-Zeff*A(ECP)
*
M1
   12
  386814.1700      61239.17550      14384.20800      4004.207590    
  1275.386930      447.8288150      170.3539970      66.42803830    
  23.52556380      9.759862000      4.512820000      2.160540000    
 0.1759220818E-01 0.2079951020E-01 0.3805728525E-01 0.6492964735E-01
 0.1090953359     0.1774678613     0.2459184983     0.2468775460    
 0.3390734148     0.6376690683     0.5085798289     0.9393979549E-01
M2
    0
COREREP
   1.000
PROJOP
    1
   16    2    2    2
  138.2775143      12.78346237    
  1453205.000      183024.6000      37505.20000      9899.251000    
  3067.379000      1068.804000      406.1585000      164.8768000    
  70.46529000      31.35984000      14.24023000      5.516831000    
  2.457151000      1.099921000     0.2572950000     0.9153216000E-01
 -0.000039098713  0.000010880601
 -0.000053217738  0.000013902576
 -0.000449393580  0.000119917275
 -0.001979089064  0.000529372168
 -0.007581598787  0.002030364867
 -0.024909065003  0.006780795041
 -0.071383472092  0.019902210848
 -0.171131797088  0.051396681027
 -0.314720041079  0.108300326250
 -0.361788857823  0.173273691620
 -0.180699613254  0.110407716511
 -0.018639087346 -0.266631575008
  0.001302734997 -0.574227214327
 -0.000901334318 -0.314657453194
  0.000152115913 -0.010894388451
  0.000035384051  0.011987032024
   11    1    6
  9.023092737    
  1761.450000      352.2744000      103.8381000      36.92634000    
  14.69441000      6.229335000      2.705822000      1.176912000    
 0.4186666000     0.1604789000     0.5929782000E-01
  0.000231228057
  0.002624762046
  0.015857912907
  0.064151715226
  0.180471081703
  0.332856158675
  0.391917608477
  0.213091611165
  0.022788663130
 -0.009416167594
  0.000317595102
*
Spectral Representation Operator
Core primitive basis
Exchange
End of Spectral Representation Operator
 

/Si.ECP.Seijo.16s11p.1s1p.0e-AIMP-Ca3Al2Si3O12-Si(tet). 
Embedding AIMP of Si(4+) in Grossular with orthogonality orbitals
made Tue.Feb.21.23:00:05.CET.2012
   4.000    1
   16    1
  1453205.000      183024.6000      37505.20000      9899.251000    
  3067.379000      1068.804000      406.1585000      164.8768000    
  70.46529000      31.35984000      14.24023000      5.516831000    
  2.457151000      1.099921000     0.2572950000     0.9153216000E-01
   0.000010880601
   0.000013902576
   0.000119917275
   0.000529372168
   0.002030364867
   0.006780795041
   0.019902210848
   0.051396681027
   0.108300326250
   0.173273691620
   0.110407716511
  -0.266631575008
  -0.574227214327
  -0.314657453194
  -0.010894388451
   0.011987032024
   11    1
  1761.450000      352.2744000      103.8381000      36.92634000    
  14.69441000      6.229335000      2.705822000      1.176912000    
 0.4186666000     0.1604789000     0.5929782000E-01
  0.000231228057
  0.002624762046
  0.015857912907
  0.064151715226
  0.180471081703
  0.332856158675
  0.391917608477
  0.213091611165
  0.022788663130
 -0.009416167594
  0.000317595102
*
* External AIMP: 
* Local Pot. Param. : (ECP convention)
*                      A(AIMP)=-Zeff*A(ECP)
*
M1
   12
  386814.1700      61239.17550      14384.20800      4004.207590    
  1275.386930      447.8288150      170.3539970      66.42803830    
  23.52556380      9.759862000      4.512820000      2.160540000    
 0.1759220818E-01 0.2079951020E-01 0.3805728525E-01 0.6492964735E-01
 0.1090953359     0.1774678613     0.2459184983     0.2468775460    
 0.3390734148     0.6376690683     0.5085798289     0.9393979549E-01
M2
    0
COREREP
   1.000
PROJOP
    1
   16    2    2    2
  138.2775143      12.78346237    
  1453205.000      183024.6000      37505.20000      9899.251000    
  3067.379000      1068.804000      406.1585000      164.8768000    
  70.46529000      31.35984000      14.24023000      5.516831000    
  2.457151000      1.099921000     0.2572950000     0.9153216000E-01
 -0.000039098713  0.000010880601
 -0.000053217738  0.000013902576
 -0.000449393580  0.000119917275
 -0.001979089064  0.000529372168
 -0.007581598787  0.002030364867
 -0.024909065003  0.006780795041
 -0.071383472092  0.019902210848
 -0.171131797088  0.051396681027
 -0.314720041079  0.108300326250
 -0.361788857823  0.173273691620
 -0.180699613254  0.110407716511
 -0.018639087346 -0.266631575008
  0.001302734997 -0.574227214327
 -0.000901334318 -0.314657453194
  0.000152115913 -0.010894388451
  0.000035384051  0.011987032024
   11    1    6
  9.023092737    
  1761.450000      352.2744000      103.8381000      36.92634000    
  14.69441000      6.229335000      2.705822000      1.176912000    
 0.4186666000     0.1604789000     0.5929782000E-01
  0.000231228057
  0.002624762046
  0.015857912907
  0.064151715226
  0.180471081703
  0.332856158675
  0.391917608477
  0.213091611165
  0.022788663130
 -0.009416167594
  0.000317595102
*
Spectral Representation Operator
Core primitive basis
Exchange
End of Spectral Representation Operator
 

/O.ECP.Seijo.0s.0s.0e-AIMP-Ca3Al2Si3O12-O.    
Embedding AIMP of O(2-)  in Grossular
made Tue.Feb.21.23:10:10.CET.2012
  -2.000    0
    0    0
*
* External AIMP: 
* Local Pot. Param. : (ECP convention)
*                      A(AIMP)=-Zeff*A(ECP)
*
M1
   12
  282885.8300      34740.01200      6502.573000      1486.426000    
  406.8273300      124.8370000      41.98461900      13.81633000    
  4.272136000      1.610321600     0.6078900000     0.2644720000    
 -.2175536641E-01 -.3192252509E-01 -.6531526793E-01 -.1221323956    
 -.2185000423     -.3848037436     -.5102784700     -.4617649223    
 -.7568765278     -1.323231308     -1.040771438     -.6264799373E-01
M2
    0
COREREP
   1.000
PROJOP
    1
    8    2    2    2
  40.30885762      2.006756386    
  2048.050000      309.0990000      70.41410000      19.70120000    
  6.031450000      10.22970000     0.9340900000     0.2862500000    
  0.006201700660  0.001319399838
  0.045637367679  0.009637176604
  0.200041108381  0.046672234517
  0.473802052465  0.116477636974
  0.380854380583  0.104205633654
  0.028870617743  0.064161933651
  0.024696410600 -0.470587894677
 -0.005610097073 -0.635401086762
    6    1    6
 0.5128994588    
  34.97120000      7.845090000      2.303320000     0.7219800000    
 0.2155300000     0.5900000000E-01
 -0.013127321176
 -0.085829784534
 -0.247123227011
 -0.448194117988
 -0.493161610211
  0.079450087883
*
Spectral Representation Operator
Core primitive basis
Exchange
End of Spectral Representation Operator
 
 
********************************************************************************
*         E.7.X. Mn3Al2Si3O12 (Spessartine)
********************************************************************************
*           E.7.X.a. Mn3Al2Si3O12
*             Structure:
*                    Geiger, American Mineralogist, Volume 82, pages 740–747, 1997
*                    (Ia-3d; a=11.6190A, x=-0.03491, =0.04791, z=0.1525)
*             Embedding potentials:
*                    L.Seijo, Z.Barandiaran, to be published
*                    Out of SCEI DKH-HF calculations
*             /Mn.ECP.Seijo.0s.0s.0e-AIMP-Mn3Al2Si3O12-Mn.
*             /Al.ECP.Seijo.0s.0s.0e-AIMP-Mn3Al2Si3O12-Al(oct).
*             /Si.ECP.Seijo.0s.0s.0e-AIMP-Mn3Al2Si3O12-Si(tet).
*             /Si.ECP.Seijo.16s11p.1s1p.0e-AIMP-Mn3Al2Si3O12-Si(tet).
*             /O.ECP.Seijo.0s.0s.0e-AIMP-Mn3Al2Si3O12-O.
********************************************************************************
/Mn.ECP.Seijo.0s.0s.0e-AIMP-Mn3Al2Si3O12-Mn.   
Embedding AIMP of Mn(2+) in Mn3Al2Si3O12 (Spessartine)
made Tue.Feb.21.17:55:02.CET.2012
   2.000    0
    0    0
*
* External AIMP: 
* Local Pot. Param. : (ECP convention)
*                      A(AIMP)=-Zeff*A(ECP)
*
M1
   15
  519780.0000      103598.0000      29595.00000      9505.000000    
  3339.700000      1264.290000      508.1000000      205.6700000    
  79.13800000      35.21300000      16.80330000      4.748900000    
  2.231380000     0.8881300000     0.3338000000    
 0.6747872321E-01 0.6467605118E-01 0.1088079050     0.1791400814    
 0.2893659185     0.4487579485     0.6049164394     0.6626743658    
  1.055736459      1.821395721     0.9911737922      1.872102944    
  2.346776084     0.8208521505     0.1661454168    
M2
    0
COREREP
   1.000
PROJOP
    2
   20    4    2    2    2    0
  484.7621758      58.86578361      7.419214715     -.9991859202    
  16703496.00      1869011.500      339227.6300      81300.73600    
  23685.41900      7984.175900      3026.372600      1252.083200    
  547.0939700      248.2524600      116.4630000      55.81182800    
  25.81883000      12.57469400      6.161630700      2.782269400    
  1.311920200     0.5889990700     0.1097419100     0.3963042800E-01
 -0.000033364706 -0.000010181060 -0.000003679539  0.000000810317
 -0.000214683893 -0.000065786891 -0.000024463194  0.000003354959
 -0.000614470367 -0.000188196141 -0.000069703325  0.000023855435
 -0.001747002312 -0.000536458090 -0.000198910850  0.000056863347
 -0.004640694949 -0.001430592398 -0.000530704925  0.000158604340
 -0.012141886671 -0.003772637851 -0.001400257309  0.000415752560
 -0.030650121014 -0.009669266636 -0.003597864939  0.001062948470
 -0.073490032319 -0.023937949499 -0.008931224062  0.002670277179
 -0.159725898747 -0.055573266916 -0.020928105773  0.006166454519
 -0.283039367164 -0.112960830605 -0.043172461598  0.013012958841
 -0.342564214685 -0.178177573918 -0.070686916575  0.020787377487
 -0.212092855160 -0.151563886160 -0.063066635518  0.019861782562
 -0.038396595995  0.143767109655  0.067423924931 -0.022601878282
  0.000733666715  0.554801639004  0.353221227180 -0.109051120721
 -0.000997473323  0.416223547951  0.404912951333 -0.144836068243
  0.000439968035  0.060717911287 -0.245188951918  0.115583449405
 -0.000140126125 -0.000670535675 -0.720074261246  0.310018580126
  0.000055472754  0.001359619053 -0.331410469046  0.369252092532
 -0.000008801029 -0.000172177251 -0.003343845843 -1.652602086827
  0.000003898284  0.000044967443  0.003833182727  0.552814783737
   15    2    6    6
  49.58307588      4.629569926    
  48651.15400      8367.381300      2285.291000      786.3517300    
  310.8725900      134.6939300      62.34761300      30.31535300    
  15.40031900      8.229254700      4.645832400      2.598334700    
 0.2861196100     0.6692845700      1.370474500    
 -0.000038080893  0.000013827418
 -0.000222380389  0.000080673818
 -0.001135936514  0.000414100954
 -0.005106369652  0.001862199459
 -0.019402036695  0.007167747369
 -0.061016612009  0.022873519405
 -0.151921482261  0.059173453562
 -0.278019294960  0.112031348899
 -0.342647892177  0.148386342899
 -0.237107767114  0.080449111222
 -0.082738305273 -0.092291864268
 -0.015150973054 -0.320675115683
 -0.000014430320 -0.032691795392
 -0.000547170558 -0.287931140980
 -0.000741300001 -0.422414923717
    9    1    5
 -.1568886080    
  201.1377300      59.69776700      22.71220600      9.550811600    
  4.279194200      1.949277000     0.8723660000     0.3751142300    
 0.1474217000    
  0.000871753956
  0.007321482080
  0.032298371234
  0.099618580724
  0.208177321013
  0.309354047080
  0.315949581313
  0.284399845377
  0.116603209942
*
Spectral Representation Operator
Core primitive basis
Exchange
End of Spectral Representation Operator
 

/Al.ECP.Seijo.0s.0s.0e-AIMP-Mn3Al2Si3O12-Al(oct).  
Embedding AIMP of Al(3+) in Mn3Al2Si3O12 (Spessartine)
made Tue.Feb.21.18:05:02.CET.2012
   3.000    0
    0    0
*
* External AIMP: 
* Local Pot. Param. : (ECP convention)
*                      A(AIMP)=-Zeff*A(ECP)
*
M1
   12
  372971.1700      57385.37550      13169.30800      3619.437590    
  1148.006930      394.6778150      149.5069970      60.26483830    
  23.41066380      9.773332000      4.340800000      1.918320000    
 0.2198442778E-01 0.2664456182E-01 0.4918142105E-01 0.8351937494E-01
 0.1414341868     0.2358388671     0.3163452841     0.3086892440    
 0.3506016843     0.7581772332     0.8202564496     0.2206605987    
M2
    0
COREREP
   1.000
PROJOP
    1
   11    2    2    2
  116.9104282      9.661359676    
  5908.580000      885.1210000      200.7280000      56.13320000    
  17.16260000      29.59110000      2.997320000      1.069540000    
  1.307260000     0.1651860000     0.6055000000E-01
  0.005666375657  0.001486572950
  0.042199412384  0.011031604989
  0.190348652934  0.054795039553
  0.462111044802  0.144592083693
  0.382427336810  0.138811111069
  0.043216533624  0.073398647289
  0.051224619103 -0.604519292967
  0.066277641440 -0.534560114703
 -0.088974038626  0.024353498617
 -0.002584204913 -0.013719521411
  0.000988315398  0.011980878182
    8    1    6
  6.305856230    
  122.4420000      28.65160000      8.855250000      2.980410000    
  1.001540000     0.3105050000     0.1124240000     0.4102600000E-01
 -0.013939383263
 -0.091706537705
 -0.297445280101
 -0.500043166541
 -0.311354002106
 -0.012841076622
  0.006188589619
  0.000378730184
*
Spectral Representation Operator
Core primitive basis
Exchange
End of Spectral Representation Operator
 

/Si.ECP.Seijo.0s.0s.0e-AIMP-Mn3Al2Si3O12-Si(tet).  
Embedding AIMP of Si(4+) in Mn3Al2Si3O12 (Spessartine)
made Tue.Feb.21.18:14:45.CET.2012
   4.000    0
    0    0
*
* External AIMP: 
* Local Pot. Param. : (ECP convention)
*                      A(AIMP)=-Zeff*A(ECP)
*
M1
   12
  386124.1700      61183.17550      14380.20800      4004.007590    
  1275.086930      447.7088150      170.3139970      66.39503830    
  23.50456380      9.751362000      4.509020000      2.160340000    
 0.1760547678E-01 0.2079636533E-01 0.3804956683E-01 0.6493354775E-01
 0.1091249282     0.1774784783     0.2459462128     0.2469630634    
 0.3393698894     0.6379511386     0.5079879674     0.9379336509E-01
M2
    0
COREREP
   1.000
PROJOP
    1
   16    2    2    2
  138.2494099      12.75482768    
  1453205.000      183024.6000      37505.20000      9899.251000    
  3067.379000      1068.804000      406.1585000      164.8768000    
  70.46529000      31.35984000      14.24023000      5.516831000    
  2.457151000      1.099921000     0.2572950000     0.9153216000E-01
 -0.000039098713  0.000010881833
 -0.000053217804  0.000013901685
 -0.000449393560  0.000119926170
 -0.001979091391  0.000529354331
 -0.007581595959  0.002030571224
 -0.024909104179  0.006780341638
 -0.071383410523  0.019905064417
 -0.171132196928  0.051390430561
 -0.314719433001  0.108325814400
 -0.361791316307  0.173222121036
 -0.180695583291  0.110526167677
 -0.018645276746 -0.266925892530
  0.001313964399 -0.573631547218
 -0.000912972668 -0.315435878029
  0.000161043625 -0.010401022774
  0.000036486347  0.012268193006
   11    1    6
  8.995332738    
  1761.450000      352.2744000      103.8381000      36.92634000    
  14.69441000      6.229335000      2.705822000      1.176912000    
 0.4186666000     0.1604789000     0.5929782000E-01
 -0.000231212278
 -0.002624604645
 -0.015856818899
 -0.064147815801
 -0.180458028701
 -0.332834681156
 -0.391870879472
 -0.213131270422
 -0.023089817545
  0.009889181942
 -0.000395842510
*
Spectral Representation Operator
Core primitive basis
Exchange
End of Spectral Representation Operator
 
/Si.ECP.Seijo.16s11p.1s1p.0e-AIMP-Mn3Al2Si3O12-Si(tet).  
Embedding AIMP of Si(4+) in Mn3Al2Si3O12 (Spessartine) with orthogonality orbitals
made Tue.Feb.21.18:14:45.CET.2012
   4.000    1
   16    1
  1453205.000      183024.6000      37505.20000      9899.251000    
  3067.379000      1068.804000      406.1585000      164.8768000    
  70.46529000      31.35984000      14.24023000      5.516831000    
  2.457151000      1.099921000     0.2572950000     0.9153216000E-01
   0.000010881833
   0.000013901685
   0.000119926170
   0.000529354331
   0.002030571224
   0.006780341638
   0.019905064417
   0.051390430561
   0.108325814400
   0.173222121036
   0.110526167677
  -0.266925892530
  -0.573631547218
  -0.315435878029
  -0.010401022774
   0.012268193006
   11    1
  1761.450000      352.2744000      103.8381000      36.92634000    
  14.69441000      6.229335000      2.705822000      1.176912000    
 0.4186666000     0.1604789000     0.5929782000E-01
 -0.000231212278
 -0.002624604645
 -0.015856818899
 -0.064147815801
 -0.180458028701
 -0.332834681156
 -0.391870879472
 -0.213131270422
 -0.023089817545
  0.009889181942
 -0.000395842510
*
* External AIMP: 
* Local Pot. Param. : (ECP convention)
*                      A(AIMP)=-Zeff*A(ECP)
*
M1
   12
  386124.1700      61183.17550      14380.20800      4004.007590    
  1275.086930      447.7088150      170.3139970      66.39503830    
  23.50456380      9.751362000      4.509020000      2.160340000    
 0.1760547678E-01 0.2079636533E-01 0.3804956683E-01 0.6493354775E-01
 0.1091249282     0.1774784783     0.2459462128     0.2469630634    
 0.3393698894     0.6379511386     0.5079879674     0.9379336509E-01
M2
    0
COREREP
   1.000
PROJOP
    1
   16    2    2    2
  138.2494099      12.75482768    
  1453205.000      183024.6000      37505.20000      9899.251000    
  3067.379000      1068.804000      406.1585000      164.8768000    
  70.46529000      31.35984000      14.24023000      5.516831000    
  2.457151000      1.099921000     0.2572950000     0.9153216000E-01
 -0.000039098713  0.000010881833
 -0.000053217804  0.000013901685
 -0.000449393560  0.000119926170
 -0.001979091391  0.000529354331
 -0.007581595959  0.002030571224
 -0.024909104179  0.006780341638
 -0.071383410523  0.019905064417
 -0.171132196928  0.051390430561
 -0.314719433001  0.108325814400
 -0.361791316307  0.173222121036
 -0.180695583291  0.110526167677
 -0.018645276746 -0.266925892530
  0.001313964399 -0.573631547218
 -0.000912972668 -0.315435878029
  0.000161043625 -0.010401022774
  0.000036486347  0.012268193006
   11    1    6
  8.995332738    
  1761.450000      352.2744000      103.8381000      36.92634000    
  14.69441000      6.229335000      2.705822000      1.176912000    
 0.4186666000     0.1604789000     0.5929782000E-01
 -0.000231212278
 -0.002624604645
 -0.015856818899
 -0.064147815801
 -0.180458028701
 -0.332834681156
 -0.391870879472
 -0.213131270422
 -0.023089817545
  0.009889181942
 -0.000395842510
*
Spectral Representation Operator
Core primitive basis
Exchange
End of Spectral Representation Operator
 

/O.ECP.Seijo.0s.0s.0e-AIMP-Mn3Al2Si3O12-O.     
Embedding AIMP of O(2-)  in Mn3Al2Si3O12 (Spessartine)
made Tue.Feb.21.18:23:59.CET.2012
  -2.000    0
    0    0
*
* External AIMP: 
* Local Pot. Param. : (ECP convention)
*                      A(AIMP)=-Zeff*A(ECP)
*
M1
   12
  282885.8300      34740.01200      6502.573000      1486.426000    
  406.8273300      124.8370000      41.98461900      13.81633000    
  4.272136000      1.610321600     0.6078900000     0.2644720000    
 -.2173945929E-01 -.3188983954E-01 -.6528106624E-01 -.1219938446    
 -.2184131619     -.3843852395     -.5100850882     -.4605161800    
 -.7557928799     -1.315541769     -1.049120896     -.6524057532E-01
M2
    0
COREREP
   1.000
PROJOP
    1
    8    2    2    2
  40.32618518      2.019529169    
  2048.050000      309.0990000      70.41410000      19.70120000    
  6.031450000      10.22970000     0.9340900000     0.2862500000    
  0.006201807698  0.001317810845
  0.045638251616  0.009618147817
  0.200045203506  0.046641991788
  0.473815740476  0.115918072621
  0.380851722674  0.102642725155
  0.028873047713  0.065337901235
  0.024627060238 -0.467213402588
 -0.005552026250 -0.638225878433
    6    1    6
 0.5215714700    
  34.97120000      7.845090000      2.303320000     0.7219800000    
 0.2155300000     0.5900000000E-01
 -0.013093747312
 -0.085514365126
 -0.246775044285
 -0.445211051449
 -0.496879138406
  0.078844588982
*
Spectral Representation Operator
Core primitive basis
Exchange
End of Spectral Representation Operator
 
 
********************************************************************************
*         E.7.X. Fe3Al2Si3O12 (Almandine)
********************************************************************************
*           E.7.X.a. Fe3Al2Si3O12
*             Structure:
*                    T.Armbruster et al., American Mineralogist, Volume 77, pages 512-521, 1992
*                    (Ia-3d; a=11.5250A, x=-0.03401, =0.04901, z=0.15278)
*             Embedding potentials:
*                    L.Seijo, Z.Barandiaran, to be published
*                    Out of SCEI DKH-HF calculations
*             /Fe.ECP.Seijo.0s.0s.0e-AIMP-Fe3Al2Si3O12-Fe.
*             /Al.ECP.Seijo.0s.0s.0e-AIMP-Fe3Al2Si3O12-Al(oct).
*             /Si.ECP.Seijo.0s.0s.0e-AIMP-Fe3Al2Si3O12-Si(tet).
*             /Si.ECP.Seijo.16s11p.1s1p.0e-AIMP-Fe3Al2Si3O12-Si(tet).
*             /O.ECP.Seijo.0s.0s.0e-AIMP-Fe3Al2Si3O12-O.
********************************************************************************
/Fe.ECP.Seijo.0s.0s.0e-AIMP-Fe3Al2Si3O12-Fe.  
Embedding AIMP of Fe(2+) in Fe3Al2Si3O12 (Almandine)
made Mon.Feb.20.22:45:09.CET.2012
   2.000    0
    0    0
*
* External AIMP: 
* Local Pot. Param. : (ECP convention)
*                      A(AIMP)=-Zeff*A(ECP)
*
M1
   15
  508400.0000      99611.00000      28065.00000      8914.900000    
  3097.700000      1159.640000      459.2200000      179.8300000    
  70.13000000      32.11700000      13.98460000      4.779600000    
  2.266480000     0.9280500000     0.3680800000    
 0.7257714904E-01 0.7072746541E-01 0.1197177062     0.1985538360    
 0.3233344826     0.4995928511     0.6503176110     0.7186749574    
  1.294588375      1.866624052     0.7395410579      2.229044616    
  2.272060677     0.8109367602     0.1337084027    
M2
    0
COREREP
   1.000
PROJOP
    2
   20    4    2    2    2    0
  527.1214065      64.64916742      8.141730508     -.9819949242    
  67207850.00      7313546.000      1289856.000      297297.8000    
  82030.03000      25799.18000      8956.748000      3359.596000    
  1341.950000      564.5881000      248.3792000      113.5084000    
  53.09401000      22.31520000      10.71686000      5.195718000    
  1.930177000     0.7799610000     0.1151095000     0.4166107000E-01
  0.000006720927 -0.000002062439 -0.000000952100 -0.000000180229
 -0.000090923095  0.000027970363  0.000011203633 -0.000000455501
 -0.000247517423  0.000076352168  0.000026001820 -0.000006985219
 -0.000681293501  0.000210199324  0.000080609283 -0.000024890005
 -0.001769250945  0.000546861464  0.000202122975 -0.000057827601
 -0.004542444921  0.001411418066  0.000528751283 -0.000155792446
 -0.011836409407  0.003697995753  0.001375555525 -0.000398700619
 -0.031020428261  0.009871703948  0.003709972796 -0.001093595509
 -0.078162096045  0.025607520458  0.009561639891 -0.002766474826
 -0.174345871341  0.061690375703  0.023544926771 -0.006979500641
 -0.307258557901  0.125535485129  0.047961621391 -0.013834990126
 -0.348227079369  0.193965251084  0.079163795177 -0.023965449064
 -0.181297832087  0.119336257939  0.047943570135 -0.012961049041
 -0.021610523282 -0.303293697921 -0.147353934694  0.041570739003
  0.001902246651 -0.596555228620 -0.471057564863  0.159772571324
 -0.000840463266 -0.261365012074 -0.179301083173  0.045081903036
  0.000308110243 -0.017038720444  0.727599718587 -0.282421685885
 -0.000074019203  0.000512044263  0.534233703730 -0.443931733534
  0.000018532283 -0.000229673164  0.011925773251  1.612667785127
 -0.000007978732  0.000130656649 -0.006908621057 -0.546714434132
   15    2    6    6
  54.79164581      5.156826586    
  48583.31000      8366.094000      2284.635000      785.7547000    
  310.9460000      134.6917000      62.34485000      30.29293000    
  15.39223000      8.228276000      4.652599000      2.579492000    
  1.363689000     0.6728342000     0.2867754000    
  0.000044546068 -0.000016312008
  0.000259159773 -0.000094862730
  0.001323079269 -0.000486430728
  0.005909322813 -0.002176073521
  0.022266848974 -0.008307034344
  0.069231738625 -0.026284120559
  0.168301563732 -0.066456066364
  0.297086664533 -0.121895351978
  0.342713840851 -0.150423459313
  0.212110783946 -0.056975767986
  0.064497325781  0.132761779177
  0.010474010583  0.352521657714
  0.000518451928  0.401540279486
  0.000510189161  0.247296743259
  0.000019354662  0.021021306282
    9    1    6
 0.7657809986E-01
  273.0655000      80.26400000      30.24102000      12.61650000    
  5.604395000      2.525704000      1.105013000     0.4598499000    
 0.1738600000    
  0.000600836938
  0.005340147746
  0.025876511836
  0.085181265734
  0.194670903787
  0.310450448850
  0.339073711479
  0.296421789239
  0.107628823567
*
Spectral Representation Operator
Core primitive basis
Exchange
End of Spectral Representation Operator
 

/Al.ECP.Seijo.0s.0s.0e-AIMP-Fe3Al2Si3O12-Al(oct). 
Embedding AIMP of Alo(3+) in Fe3Al2Si3O12 (Almandine)
made Mon.Feb.20.22:55:02.CET.2012
   3.000    0
    0    0
*
* External AIMP: 
* Local Pot. Param. : (ECP convention)
*                      A(AIMP)=-Zeff*A(ECP)
*
M1
   12
  372971.1700      57385.37550      13169.30800      3619.437590    
  1148.006930      394.6778150      149.5069970      60.26483830    
  23.41066380      9.773332000      4.340800000      1.918320000    
 0.2198624936E-01 0.2664201695E-01 0.4919197217E-01 0.8350322670E-01
 0.1414769183     0.2357751277     0.3164908470     0.3084744408    
 0.3510251383     0.7575594013     0.8212908503     0.2199171445    
M2
    0
COREREP
   1.000
PROJOP
    1
   11    2    2    2
  116.7585458      9.509670569    
  5908.580000      885.1210000      200.7280000      56.13320000    
  17.16260000      29.59110000      2.997320000      1.069540000    
  1.307260000     0.1651860000     0.6055000000E-01
  0.005666373088  0.001486737547
  0.042199367525  0.011033656652
  0.190348608496  0.054798229775
  0.462109470288  0.144658319687
  0.382423781209  0.139005812354
  0.043219797746  0.073259324545
  0.051239821675 -0.605387787772
  0.066370357372 -0.541535217174
 -0.089069964177  0.031039411798
 -0.002606657596 -0.011478999466
  0.000994820206  0.011440361701
    8    1    6
  6.155070284    
  122.4420000      28.65160000      8.855250000      2.980410000    
  1.001540000     0.3105050000     0.1124240000     0.4102600000E-01
  0.013940140244
  0.091704837062
  0.297468066292
  0.499998835609
  0.311625832988
  0.012692620991
 -0.007220420385
  0.000038516303
*
Spectral Representation Operator
Core primitive basis
Exchange
End of Spectral Representation Operator
 

/Si.ECP.Seijo.0s.0s.0e-AIMP-Fe3Al2Si3O12-Si(tet). 
Embedding AIMP of Sit(4+) in Fe3Al2Si3O12 (Almandine)
made Mon.Feb.20.23:05:26.CET.2012
   4.000    0
    0    0
*
* External AIMP: 
* Local Pot. Param. : (ECP convention)
*                      A(AIMP)=-Zeff*A(ECP)
*
M1
   12
  386594.1700      61287.17550      14417.20800      4012.507590    
  1276.986930      448.5388150      170.7039970      66.55603830    
  23.55856380      9.772362000      4.520320000      2.171040000    
 0.1759457271E-01 0.2076711319E-01 0.3799204829E-01 0.6491384046E-01
 0.1090487877     0.1772106366     0.2457667182     0.2470787816    
 0.3387387107     0.6372569762     0.5088160419     0.9481577249E-01
M2
    0
COREREP
   1.000
PROJOP
    1
   16    2    2    2
  138.0882903      12.59267433    
  1453205.000      183024.6000      37505.20000      9899.251000    
  3067.379000      1068.804000      406.1585000      164.8768000    
  70.46529000      31.35984000      14.24023000      5.516831000    
  2.457151000      1.099921000     0.2572950000     0.9153216000E-01
 -0.000039098706  0.000010884238
 -0.000053217827  0.000013902431
 -0.000449392929  0.000119957301
 -0.001979093135  0.000529381810
 -0.007581580057  0.002031217391
 -0.024909144062  0.006780245442
 -0.071383183733  0.019913040797
 -0.171132670203  0.051384144624
 -0.314717606949  0.108388922641
 -0.361794913407  0.173140794341
 -0.180689070267  0.110775834594
 -0.018659620764 -0.267516604581
  0.001336119822 -0.572679002180
 -0.000935444768 -0.316976089752
  0.000182625721 -0.008614759210
  0.000033045254  0.012073337802
   11    1    6
  8.835298025    
  1761.450000      352.2744000      103.8381000      36.92634000    
  14.69441000      6.229335000      2.705822000      1.176912000    
 0.4186666000     0.1604789000     0.5929782000E-01
 -0.000231207371
 -0.002624765542
 -0.015856461856
 -0.064151923719
 -0.180449673639
 -0.332871750163
 -0.391827111108
 -0.213307754245
 -0.023031703933
  0.010571337545
 -0.000623914827
*
Spectral Representation Operator
Core primitive basis
Exchange
End of Spectral Representation Operator
 

/Si.ECP.Seijo.16s11p.1s1p.0e-AIMP-Fe3Al2Si3O12-Si(tet). 
Embedding AIMP of Sit(4+) in Fe3Al2Si3O12 (Almandine) with orthogonality orbitals
made Mon.Feb.20.23:05:26.CET.2012
   4.000    1
  138.0882903      12.59267433    
  1453205.000      183024.6000      37505.20000      9899.251000    
  3067.379000      1068.804000      406.1585000      164.8768000    
  70.46529000      31.35984000      14.24023000      5.516831000    
  2.457151000      1.099921000     0.2572950000     0.9153216000E-01
   0.000010884238
   0.000013902431
   0.000119957301
   0.000529381810
   0.002031217391
   0.006780245442
   0.019913040797
   0.051384144624
   0.108388922641
   0.173140794341
   0.110775834594
  -0.267516604581
  -0.572679002180
  -0.316976089752
  -0.008614759210
   0.012073337802
   11    1 
  1761.450000      352.2744000      103.8381000      36.92634000    
  14.69441000      6.229335000      2.705822000      1.176912000    
 0.4186666000     0.1604789000     0.5929782000E-01
 -0.000231207371
 -0.002624765542
 -0.015856461856
 -0.064151923719
 -0.180449673639
 -0.332871750163
 -0.391827111108
 -0.213307754245
 -0.023031703933
  0.010571337545
 -0.000623914827
*
* External AIMP: 
* Local Pot. Param. : (ECP convention)
*                      A(AIMP)=-Zeff*A(ECP)
*
M1
   12
  386594.1700      61287.17550      14417.20800      4012.507590    
  1276.986930      448.5388150      170.7039970      66.55603830    
  23.55856380      9.772362000      4.520320000      2.171040000    
 0.1759457271E-01 0.2076711319E-01 0.3799204829E-01 0.6491384046E-01
 0.1090487877     0.1772106366     0.2457667182     0.2470787816    
 0.3387387107     0.6372569762     0.5088160419     0.9481577249E-01
M2
    0
COREREP
   1.000
PROJOP
    1
   16    2    2    2
  138.0882903      12.59267433    
  1453205.000      183024.6000      37505.20000      9899.251000    
  3067.379000      1068.804000      406.1585000      164.8768000    
  70.46529000      31.35984000      14.24023000      5.516831000    
  2.457151000      1.099921000     0.2572950000     0.9153216000E-01
 -0.000039098706  0.000010884238
 -0.000053217827  0.000013902431
 -0.000449392929  0.000119957301
 -0.001979093135  0.000529381810
 -0.007581580057  0.002031217391
 -0.024909144062  0.006780245442
 -0.071383183733  0.019913040797
 -0.171132670203  0.051384144624
 -0.314717606949  0.108388922641
 -0.361794913407  0.173140794341
 -0.180689070267  0.110775834594
 -0.018659620764 -0.267516604581
  0.001336119822 -0.572679002180
 -0.000935444768 -0.316976089752
  0.000182625721 -0.008614759210
  0.000033045254  0.012073337802
   11    1    6
  8.835298025    
  1761.450000      352.2744000      103.8381000      36.92634000    
  14.69441000      6.229335000      2.705822000      1.176912000    
 0.4186666000     0.1604789000     0.5929782000E-01
 -0.000231207371
 -0.002624765542
 -0.015856461856
 -0.064151923719
 -0.180449673639
 -0.332871750163
 -0.391827111108
 -0.213307754245
 -0.023031703933
  0.010571337545
 -0.000623914827
*
Spectral Representation Operator
Core primitive basis
Exchange
End of Spectral Representation Operator
 

/O.ECP.Seijo.0s.0s.0e-AIMP-Fe3Al2Si3O12-O.    
Embedding AIMP of O(2-) in Fe3Al2Si3O12 (Almandine)
made Mon.Feb.20.23:15:06.CET.2012
  -2.000    0
    0    0
*
* External AIMP: 
* Local Pot. Param. : (ECP convention)
*                      A(AIMP)=-Zeff*A(ECP)
*
M1
   12
  282885.8300      34740.01200      6502.573000      1486.426000    
  406.8273300      124.8370000      41.98461900      13.81633000    
  4.272136000      1.610321600     0.6078900000     0.2644720000    
 -.2174710534E-01 -.3191700557E-01 -.6528122886E-01 -.1221227784    
 -.2183773878     -.3847872849     -.5099422461     -.4618519556    
 -.7549600651     -1.322927927     -1.043741059     -.6234395638E-01
M2
    0
COREREP
   1.000
PROJOP
    1
    8    2    2    2
  40.35582440      2.059658794    
  2048.050000      309.0990000      70.41410000      19.70120000    
  6.031450000      10.22970000     0.9340900000     0.2862500000    
  0.006201713181  0.001317510623
  0.045637641048  0.009620251561
  0.200041477492  0.046615398601
  0.473810528443  0.116128180048
  0.380873959979  0.103432459977
  0.028849856621  0.064583087476
  0.024661783472 -0.467693946610
 -0.005567967968 -0.637901974894
    6    1    6
 0.5587006844    
  34.97120000      7.845090000      2.303320000     0.7219800000    
 0.2155300000     0.5900000000E-01
 -0.013102405211
 -0.085768590988
 -0.246499570353
 -0.448329425497
 -0.494148825682
  0.080801987835
*
Spectral Representation Operator
Core primitive basis
Exchange
End of Spectral Representation Operator
 
 
********************************************************************************
*         E.7.X. Ca3Fe2Si3O12 (Andradite)
********************************************************************************
*           E.7.X.a. Ca3Fe2Si3O12
*             Structure:
*                    S.Quartieri et al. American Mineralogist 91 (2006) 1240-1248
*                    (Ia-3d; a=11.5250A, x=-0.03401, =0.04901, z=0.15278)
*             Embedding potentials:
*                    L.Seijo, Z.Barandiaran, to be published
*                    Out of SCEI DKH-HF calculations
*             /Ca.ECP.Seijo.0s.0s.0e-AIMP-Ca3Fe2Si3O12-Ca.
*             /Fe.ECP.Seijo.0s.0s.0e-AIMP-Ca3Fe2Si3O12-Fe(oct).
*             /Si.ECP.Seijo.0s.0s.0e-AIMP-Ca3Fe2Si3O12-Si(tet).
*             /Si.ECP.Seijo.16s11p.1s1p.0e-AIMP-Ca3Fe2Si3O12-Si(tet).
*             /O.ECP.Seijo.0s.0s.0e-AIMP-Ca3Fe2Si3O12-O.
********************************************************************************
/Ca.ECP.Seijo.0s.0s.0e-AIMP-Ca3Fe2Si3O12-Ca.  
Embedding AIMP of Ca(2+) in Ca3Fe2Si3O12 (Andradite)
made Wed.Feb.22.13:09:44.CET.2012
   2.000    0
    0    0
*
* External AIMP: 
* Local Pot. Param. : (ECP convention)
*                      A(AIMP)=-Zeff*A(ECP)
*
M1
   14
  386580.0000      61108.00000      14610.00000      4141.000000    
  1329.700000      471.9800000      177.6900000      63.14600000    
  25.76100000      12.18120000      3.223500000      1.637300000    
 0.8392400000     0.4298900000    
 0.6024200315E-01 0.7106190061E-01 0.1274626764     0.2201444015    
 0.3686973828     0.5556182740     0.6363229877     0.8032762090    
  1.557158276      1.295905160     0.7194103979      1.688440269    
 0.8712738092     0.2498625320E-01
M2
    0
COREREP
   1.000
PROJOP
    1
   20    3    2    2    2
  299.5915246      33.29280851      3.872679242    
  15429060.00      1717766.000      325290.8000      83104.29000    
  25219.11000      8662.800000      3220.967000      1283.738000    
  543.4592000      240.8390000      109.9677000      51.34453000    
  24.28419000      10.50093000      4.922923000      2.340607000    
 0.9214525000     0.3826710000     0.6533290000E-01 0.2618455000E-01
 -0.000027810218 -0.000008190289 -0.000002790595
 -0.000115765866 -0.000033740812 -0.000011834972
 -0.000336265849 -0.000098684641 -0.000033829110
 -0.000900925946 -0.000264426910 -0.000091383649
 -0.002361576635 -0.000694260719 -0.000238861519
 -0.006274381700 -0.001856458726 -0.000642529100
 -0.017042352968 -0.005074822128 -0.001745192410
 -0.044365266724 -0.013531450306 -0.004708483755
 -0.105346161364 -0.033385253530 -0.011527337550
 -0.214805781448 -0.075062051945 -0.026585500109
 -0.335645757727 -0.140365185857 -0.049736647420
 -0.309851396584 -0.186534538804 -0.071169470669
 -0.112212596451 -0.043747168999 -0.014106759818
 -0.007663911033  0.400502949293  0.181778654191
 -0.000347967066  0.569358711259  0.442386305976
  0.000034042931  0.176344025243  0.098223413246
  0.000044369559  0.007810888710 -0.689719708553
  0.000013467113  0.000672745202 -0.548615011256
  0.000000769627 -0.000157520365  0.007449153998
 -0.000000503776  0.000068292432  0.001081296301
   15    2    6    6
  26.64615744      2.033294909    
  51912.48000      8887.833000      2423.370000      833.8344000    
  329.6573000      142.4756000      65.46554000      31.43317000    
  15.49410000      7.765115000      3.924985000      1.924370000    
 0.9138395000     0.4202105000     0.1757597000    
 -0.000014571043 -0.000004794009
 -0.000084899423 -0.000027639940
 -0.000435536187 -0.000144468417
 -0.001990417760 -0.000647618890
 -0.007867795333 -0.002630410928
 -0.026521662521 -0.008747736483
 -0.075263759179 -0.025938168297
 -0.171398466101 -0.059265976693
 -0.294455492868 -0.109103361244
 -0.349415516818 -0.130951129320
 -0.222264936828 -0.065767408440
 -0.049873600831  0.234410917187
 -0.001391677186  0.436434538350
 -0.000696646391  0.441959805173
 -0.000244102582  0.035299838684
*
Spectral Representation Operator
Core primitive basis
Exchange
End of Spectral Representation Operator
 

/Fe.ECP.Seijo.0s.0s.0e-AIMP-Ca3Fe2Si3O12-Fe(oct). 
Embedding AIMP of Fe(3+) in Ca3Fe2Si3O12 (Andradite)
made Wed.Feb.22.13:20:21.CET.2012
   3.000    0
    0    0
*
* External AIMP: 
* Local Pot. Param. : (ECP convention)
*                      A(AIMP)=-Zeff*A(ECP)
*
M1
   15
  509880.0000      100152.0000      28310.00000      9011.300000    
  3131.600000      1172.720000      465.7900000      183.8200000    
  71.58800000      32.87600000      15.01080000      4.932600000    
  2.427780000      1.063400000     0.4340500000    
 0.4700834099E-01 0.4566105243E-01 0.7705611466E-01 0.1280410298    
 0.2095118080     0.3268457494     0.4301305864     0.4690740214    
 0.8258688187      1.235351984     0.4904456230      1.368094168    
  1.472293732     0.4788993541     0.6238428304E-01
M2
    0
COREREP
   1.000
PROJOP
    2
   20    4    2    2    2    0
  522.9613640      64.60090039      8.851620451     -.8042583974    
  67207850.00      7313546.000      1289856.000      297297.8000    
  82030.03000      25799.18000      8956.748000      3359.596000    
  1341.950000      564.5881000      248.3792000      113.5084000    
  53.09401000      22.31520000      10.71686000      5.195718000    
  1.930177000     0.7799610000     0.1151095000     0.4166107000E-01
  0.000006281920 -0.000001961011 -0.000000929832 -0.000000172798
 -0.000083093863  0.000026007766  0.000010700689 -0.000000215097
 -0.000328871201  0.000103501261  0.000037142732 -0.000008789521
  0.000186702559 -0.000060633123 -0.000021222402  0.000002762363
 -0.000902169920  0.000276864022  0.000102911867 -0.000029726643
 -0.002369849226  0.000720865085  0.000273010484 -0.000085887499
 -0.008772120914  0.002684320638  0.001006784617 -0.000321273073
 -0.026461716724  0.008227430188  0.003117909934 -0.000954730939
 -0.072748983838  0.023294886772  0.008776137994 -0.002840286643
 -0.169411055503  0.058587229708  0.022525524095 -0.006821908573
 -0.306846814162  0.123128347170  0.047526681869 -0.015753447593
 -0.354149751190  0.195000805783  0.080077357322 -0.023445376556
 -0.186888517303  0.130558227988  0.054101084222 -0.021673336755
 -0.022650877005 -0.288565337035 -0.140817844284  0.057645807959
  0.001698465937 -0.602286996375 -0.473138458871  0.139148938977
 -0.001007327307 -0.272499632092 -0.205161036355  0.115101563159
  0.000418598972 -0.018613111815  0.741889384643 -0.426178002208
 -0.000005848277  0.000331661647  0.537950296079 -0.341143095926
  0.000010281605 -0.000013002913 -0.001145700454  1.734041899850
 -0.000025957049  0.000171452149 -0.004327842515 -0.761734955899
   15    2    6    6
  55.60964681      5.972769007    
  48583.31000      8366.094000      2284.635000      785.7547000    
  310.9460000      134.6917000      62.34485000      30.29293000    
  15.39223000      8.228276000      4.652599000      2.579492000    
  1.363689000     0.6728342000     0.2867754000    
  0.000008829622 -0.000003283331
  0.000130810816 -0.000048319313
  0.000990179042 -0.000368754648
  0.005183773512 -0.001927217987
  0.020899384134 -0.007895003784
  0.067091478571 -0.025728302798
  0.166047894667 -0.066513486979
  0.296262985942 -0.122912643978
  0.344375675031 -0.154708299582
  0.214537240174 -0.058017762865
  0.065256945548  0.128969226627
  0.010656322127  0.367301578294
  0.000287815571  0.403569183859
  0.000599097007  0.243821189809
 -0.000123825028  0.003422662688
    9    1    5
 0.7598298196    
  273.0655000      80.26400000      30.24102000      12.61650000    
  5.604395000      2.525704000      1.105013000     0.4598499000    
 0.1738600000    
  0.000595706831
  0.005546992771
  0.027275675722
  0.090281641695
  0.206481327701
  0.328407860099
  0.351790286636
  0.267544954829
  0.066177385558
*
Spectral Representation Operator
Core primitive basis
Exchange
End of Spectral Representation Operator
 

/Si.ECP.Seijo.0s.0s.0e-AIMP-Ca3Fe2Si3O12-Si(tet). 
Embedding AIMP of Si(4+) in Ca3Fe2Si3O12 (Andradite)
made Wed.Feb.22.13:30:16.CET.2012
   4.000    0
    0    0
*
* External AIMP: 
* Local Pot. Param. : (ECP convention)
*                      A(AIMP)=-Zeff*A(ECP)
*
M1
   12
  386614.1700      61223.17550      14382.20800      4004.807590    
  1275.486930      447.7488150      170.3339970      66.43403830    
  23.54556380      9.776962000      4.528020000      2.181440000    
 0.1759716635E-01 0.2080159323E-01 0.3805692652E-01 0.6491806479E-01
 0.1091297343     0.1775133396     0.2459052971     0.2468092242    
 0.3384850871     0.6365197830     0.5085559629     0.9570782083E-01
M2
    0
COREREP
   1.000
PROJOP
    1
   16    2    2    2
  138.0911674      12.59498972    
  1453205.000      183024.6000      37505.20000      9899.251000    
  3067.379000      1068.804000      406.1585000      164.8768000    
  70.46529000      31.35984000      14.24023000      5.516831000    
  2.457151000      1.099921000     0.2572950000     0.9153216000E-01
 -0.000039098699  0.000010885496
 -0.000053217779  0.000013904210
 -0.000449392323  0.000119980012
 -0.001979092387  0.000529433246
 -0.007581567294  0.002031660614
 -0.024909141854  0.006780697889
 -0.071383023855  0.019918136821
 -0.171132711906  0.051385041621
 -0.314716442466  0.108425699165
 -0.361795877528  0.173116504878
 -0.180686890845  0.110899597334
 -0.018667345497 -0.267794366364
  0.001346179966 -0.572371734568
 -0.000945282556 -0.317698144639
  0.000194393052 -0.007358451549
  0.000029421566  0.011664390509
   11    1    6
  8.838986321    
  1761.450000      352.2744000      103.8381000      36.92634000    
  14.69441000      6.229335000      2.705822000      1.176912000    
 0.4186666000     0.1604789000     0.5929782000E-01
 -0.000231213862
 -0.002625134508
 -0.015856903931
 -0.064161349055
 -0.180449391094
 -0.332945090874
 -0.391796893408
 -0.213511294919
 -0.022560862652
  0.010681620743
 -0.000748063751
*
Spectral Representation Operator
Core primitive basis
Exchange
End of Spectral Representation Operator
 
/Si.ECP.Seijo.16s11p.1s1p.0e-AIMP-Ca3Fe2Si3O12-Si(tet). 
Embedding AIMP of Si(4+) in Ca3Fe2Si3O12 (Andradite) with orthogonality orbitals
made Wed.Feb.22.13:30:16.CET.2012
   4.000    1
   16    1
  1453205.000      183024.6000      37505.20000      9899.251000    
  3067.379000      1068.804000      406.1585000      164.8768000    
  70.46529000      31.35984000      14.24023000      5.516831000    
  2.457151000      1.099921000     0.2572950000     0.9153216000E-01
   0.000010885496
   0.000013904210
   0.000119980012
   0.000529433246
   0.002031660614
   0.006780697889
   0.019918136821
   0.051385041621
   0.108425699165
   0.173116504878
   0.110899597334
  -0.267794366364
  -0.572371734568
  -0.317698144639
  -0.007358451549
   0.011664390509
   11    1
  1761.450000      352.2744000      103.8381000      36.92634000    
  14.69441000      6.229335000      2.705822000      1.176912000    
 0.4186666000     0.1604789000     0.5929782000E-01
 -0.000231213862
 -0.002625134508
 -0.015856903931
 -0.064161349055
 -0.180449391094
 -0.332945090874
 -0.391796893408
 -0.213511294919
 -0.022560862652
  0.010681620743
 -0.000748063751
*
* External AIMP: 
* Local Pot. Param. : (ECP convention)
*                      A(AIMP)=-Zeff*A(ECP)
*
M1
   12
  386614.1700      61223.17550      14382.20800      4004.807590    
  1275.486930      447.7488150      170.3339970      66.43403830    
  23.54556380      9.776962000      4.528020000      2.181440000    
 0.1759716635E-01 0.2080159323E-01 0.3805692652E-01 0.6491806479E-01
 0.1091297343     0.1775133396     0.2459052971     0.2468092242    
 0.3384850871     0.6365197830     0.5085559629     0.9570782083E-01
M2
    0
COREREP
   1.000
PROJOP
    1
   16    2    2    2
  138.0911674      12.59498972    
  1453205.000      183024.6000      37505.20000      9899.251000    
  3067.379000      1068.804000      406.1585000      164.8768000    
  70.46529000      31.35984000      14.24023000      5.516831000    
  2.457151000      1.099921000     0.2572950000     0.9153216000E-01
 -0.000039098699  0.000010885496
 -0.000053217779  0.000013904210
 -0.000449392323  0.000119980012
 -0.001979092387  0.000529433246
 -0.007581567294  0.002031660614
 -0.024909141854  0.006780697889
 -0.071383023855  0.019918136821
 -0.171132711906  0.051385041621
 -0.314716442466  0.108425699165
 -0.361795877528  0.173116504878
 -0.180686890845  0.110899597334
 -0.018667345497 -0.267794366364
  0.001346179966 -0.572371734568
 -0.000945282556 -0.317698144639
  0.000194393052 -0.007358451549
  0.000029421566  0.011664390509
   11    1    6
  8.838986321    
  1761.450000      352.2744000      103.8381000      36.92634000    
  14.69441000      6.229335000      2.705822000      1.176912000    
 0.4186666000     0.1604789000     0.5929782000E-01
 -0.000231213862
 -0.002625134508
 -0.015856903931
 -0.064161349055
 -0.180449391094
 -0.332945090874
 -0.391796893408
 -0.213511294919
 -0.022560862652
  0.010681620743
 -0.000748063751
*
Spectral Representation Operator
Core primitive basis
Exchange
End of Spectral Representation Operator
 

/O.ECP.Seijo.0s.0s.0e-AIMP-Ca3Fe2Si3O12-O.    
Embedding AIMP of O(2-)  in Ca3Fe2Si3O12 (Andradite)
made Wed.Feb.22.13:39:57.CET.2012
  -2.000    0
    0    0
*
* External AIMP: 
* Local Pot. Param. : (ECP convention)
*                      A(AIMP)=-Zeff*A(ECP)
*
M1
   12
  282885.8300      34740.01200      6502.573000      1486.426000    
  406.8273300      124.8370000      41.98461900      13.81633000    
  4.272136000      1.610321600     0.6078900000     0.2644720000    
 -.2175803355E-01 -.3193873871E-01 -.6530575025E-01 -.1222140461    
 -.2184418858     -.3850627207     -.5100864962     -.4626803515    
 -.7556803375     -1.328268550     -1.037824257     -.6073883207E-01
M2
    0
COREREP
   1.000
PROJOP
    1
    8    2    2    2
  40.38797590      2.093985487    
  2048.050000      309.0990000      70.41410000      19.70120000    
  6.031450000      10.22970000     0.9340900000     0.2862500000    
  0.006201647880  0.001318665781
  0.045637060950  0.009633496529
  0.200039023473  0.046639526181
  0.473800392964  0.116502148366
  0.380870052176  0.104453872170
  0.028853989424  0.063830476455
  0.024709779743 -0.470023640632
 -0.005609144907 -0.635943859292
    6    1    6
 0.5962102876    
  34.97120000      7.845090000      2.303320000     0.7219800000    
 0.2155300000     0.5900000000E-01
 -0.013122094029
 -0.085996703634
 -0.246636545751
 -0.450696220803
 -0.490687329138
  0.079720904568
*
Spectral Representation Operator
Core primitive basis
Exchange
End of Spectral Representation Operator
 
 
********************************************************************************
*         E.7.X. Ca3Sc2Si3O12 
********************************************************************************
*           E.7.X.a. Ca3Sc2Si3O12
*             Structure:
*                    S.Quartieri et al., American Mineralogist 91 (2006) 1240-1248
*                    (Ia-3d; a=12.2500A, x=-0.04004, =0.0501, z=0.15887)
*             Embedding potentials:
*                    L.Seijo, Z.Barandiaran, to be published
*                    Out of SCEI DKH-HF calculations
*             /Ca.ECP.Seijo.0s.0s.0e-AIMP-Ca3Sc2Si3O12-Ca.
*             /Sc.ECP.Seijo.0s.0s.0e-AIMP-Ca3Sc2Si3O12-Sc(oct).
*             /Si.ECP.Seijo.0s.0s.0e-AIMP-Ca3Sc2Si3O12-Si(tet).
*             /Si.ECP.Seijo.16s11p.1s1p.0e-AIMP-Ca3Sc2Si3O12-Si(tet).
*             /Si.ECP.Seijo.16s11p.1s1p.0e-AIMP-Ca3Sc2Si3O12-Si(tet).
*             /O.ECP.Seijo.0s.0s.0e-AIMP-Ca3Sc2Si3O12-O.
********************************************************************************
/Ca.ECP.Seijo.0s.0s.0e-AIMP-Ca3Sc2Si3O12-Ca.  
Embedding AIMP of Ca(2+) in Ca3Sc2Si3O12 
made Tue.Feb.21.18:36:11.CET.2012
   2.000    0
    0    0
*
* External AIMP: 
* Local Pot. Param. : (ECP convention)
*                      A(AIMP)=-Zeff*A(ECP)
*
M1
   14
  384290.0000      60558.00000      14466.00000      4091.800000    
  1312.000000      465.5600000      174.9900000      62.01800000    
  25.37300000      12.01660000      3.100400000      1.583000000    
 0.8146200000     0.3838700000    
 0.6048198358E-01 0.7144729638E-01 0.1282389359     0.2219765053    
 0.3715458776     0.5587114642     0.6376203824     0.8141441251    
  1.570390533      1.269706349     0.7899163983      1.680802694    
 0.8117561528     0.1326130287E-01
M2
    0
COREREP
   1.000
PROJOP
    1
   20    3    2    2    2
  299.6720429      33.37406470      3.955324151    
  15429060.00      1717766.000      325290.8000      83104.29000    
  25219.11000      8662.800000      3220.967000      1283.738000    
  543.4592000      240.8390000      109.9677000      51.34453000    
  24.28419000      10.50093000      4.922923000      2.340607000    
 0.9214525000     0.3826710000     0.6533290000E-01 0.2618455000E-01
 -0.000027810214 -0.000008190272 -0.000002790579
 -0.000115765858 -0.000033740810 -0.000011834281
 -0.000336265723 -0.000098683721 -0.000033833746
 -0.000900925681 -0.000264425409 -0.000091386745
 -0.002361575945 -0.000694254926 -0.000238896606
 -0.006274379599 -0.001856449495 -0.000642515949
 -0.017042348318 -0.005074773357 -0.001745569203
 -0.044365250241 -0.013531400288 -0.004708041388
 -0.105346132133 -0.033384872778 -0.011530808418
 -0.214805676074 -0.075061888660 -0.026580250690
 -0.335645600153 -0.140363000615 -0.049759720518
 -0.309851138445 -0.186535157252 -0.071128583449
 -0.112213242104 -0.043743314546 -0.014204751100
 -0.007663826584  0.400485246802  0.182014066011
 -0.000348479740  0.569375654102  0.441913417430
  0.000034731021  0.176318246142  0.099061373997
  0.000043711524  0.007861225767 -0.690854609146
  0.000014073820  0.000632950597 -0.547848103150
  0.000000088502 -0.000118347687  0.007553254884
 -0.000000083504  0.000046039016  0.000616846938
   15    2    6    6
  26.72734158      2.115263137    
  51912.48000      8887.833000      2423.370000      833.8344000    
  329.6573000      142.4756000      65.46554000      31.43317000    
  15.49410000      7.765115000      3.924985000      1.924370000    
 0.9138395000     0.4202105000     0.1757597000    
 -0.000014570931  0.000004794546
 -0.000084898643  0.000027643673
 -0.000435533202  0.000144482749
 -0.001990398387  0.000647710907
 -0.007867741527  0.002630665475
 -0.026521392467  0.008748982975
 -0.075263183920  0.025940606306
 -0.171396314591  0.059274556466
 -0.294453681971  0.109112248195
 -0.349413156590  0.130976902259
 -0.222269200506  0.065766318424
 -0.049875294001 -0.234415474233
 -0.001400791336 -0.436430539327
 -0.000688777991 -0.442818283921
 -0.000242691025 -0.034045467007
*
Spectral Representation Operator
Core primitive basis
Exchange
End of Spectral Representation Operator
 

/Sc.ECP.Seijo.0s.0s.0e-AIMP-Ca3Sc2Si3O12-Sc(oct). 
Embedding AIMP of Sc(3+) in Ca3Sc2Si3O12 
made Tue.Feb.21.18:50:17.CET.2012
   3.000    0
    0    0
*
* External AIMP: 
* Local Pot. Param. : (ECP convention)
*                      A(AIMP)=-Zeff*A(ECP)
*
M1
   15
  506750.0000      98854.00000      27649.00000      8778.700000    
  3051.100000      1143.000000      457.1800000      189.3000000    
  74.18700000      31.90200000      15.55870000      6.238800000    
  2.538980000      1.438810000     0.9220800000    
 0.3500129211E-01 0.3428570275E-01 0.5803041930E-01 0.9538449938E-01
 0.1552829743     0.2463195774     0.3503887715     0.3909439394    
 0.4750744424     0.9277622311     0.9656761882     0.2012916726    
  1.018065730     0.7319272898     0.3145652698    
M2
    0
COREREP
   1.000
PROJOP
    2
   20    4    2    2    2    0
  331.6252432      38.15800785      5.010956865     -1.118095402    
  12809350.00      1543198.000      309741.6000      82804.01000    
  25477.23000      8662.397000      3209.424000      1277.854000    
  544.1870000      241.5685000      110.0690000      51.22249000    
  23.85044000      10.65195000      4.951277000      2.201284000    
 0.9952089000     0.4260318000     0.7634914000E-01 0.2966669000E-01
 -0.000018683137  0.000005536485  0.000001849640  0.000000376637
 -0.000184019551  0.000055378462  0.000020417058  0.000004248229
  0.000080771076 -0.000025083966 -0.000009506384 -0.000002413198
 -0.000507659429  0.000149979383  0.000054195996  0.000009545861
 -0.001458055261  0.000427148396  0.000152821262  0.000025230756
 -0.005439336357  0.001605507823  0.000577177612  0.000094973172
 -0.016824938369  0.004998092972  0.001792615984  0.000301731272
 -0.046711502910  0.014229069161  0.005134355756  0.000837653246
 -0.112445409611  0.035802001802  0.012929198313  0.002196327655
 -0.230533778466  0.081648709549  0.029979343472  0.004855010797
 -0.348554603568  0.151513984343  0.056620840219  0.009816958502
 -0.295962533248  0.189178041806  0.074851330759  0.011725862416
 -0.088521929406  0.009329349207  0.002985674482  0.002478380525
 -0.003145339039 -0.461178579916 -0.235976300680 -0.046235620503
 -0.001290037403 -0.556228915258 -0.475748230628 -0.078765600273
  0.000482579089 -0.122782506609 -0.005207882604 -0.025598397504
 -0.000120310079  0.001304522278  0.750804138245  0.262238357793
  0.000094032165 -0.002661072267  0.478654472719  0.099515511636
 -0.000011498372  0.001139235224 -0.035650433931 -0.082549891145
 -0.000002954613 -0.000405552321  0.007935510607 -0.971658553309
   15    2    6    6
  31.34381071      2.998266045    
  52100.92000      8878.356000      2420.283000      833.9572000    
  329.7121000      142.4848000      65.47393000      31.44028000    
  15.48991000      7.769822000      3.926292000      1.903938000    
 0.9066862000     0.4223046000     0.1753043000    
  0.000003470960 -0.000001217905
  0.000052355354 -0.000017964504
  0.000397373968 -0.000139264820
  0.002115427521 -0.000729229679
  0.008877341304 -0.003132373553
  0.030517207727 -0.010698614706
  0.086381354854 -0.031557687736
  0.191927820409 -0.071005453883
  0.316308621531 -0.125269740356
  0.343976701220 -0.139090592918
  0.185023053212 -0.023511631602
  0.031602894498  0.322791805270
  0.000136962392  0.471512046242
  0.000676230631  0.349489750234
 -0.000391938255 -0.026901269170
    9    1    0
 -.6436649804    
  125.9835000      36.09441000      13.19322000      5.290896000    
  2.276719000     0.9978463000     0.4322448000     0.1810401000    
 0.7055681000E-01
 -0.000730420798
 -0.006791247606
 -0.029791069457
 -0.096632436774
 -0.201795435760
 -0.338812249158
 -0.309125270217
 -0.450118589732
  0.248212931686
*
Spectral Representation Operator
Core primitive basis
Exchange
End of Spectral Representation Operator
 

/Si.ECP.Seijo.0s.0s.0e-AIMP-Ca3Sc2Si3O12-Si(tet). 
Embedding AIMP of Si(4+) in Ca3Sc2Si3O12 
made Tue.Feb.21.19:00:43.CET.2012
   4.000    0
    0    0
*
* External AIMP: 
* Local Pot. Param. : (ECP convention)
*                      A(AIMP)=-Zeff*A(ECP)
*
M1
   12
  386824.1700      61256.17550      14385.20800      4007.307590    
  1276.586930      448.0888150      170.4439970      66.48803830    
  23.57856380      9.795362000      4.540920000      2.195340000    
 0.1759170270E-01 0.2080320080E-01 0.3805193936E-01 0.6487459819E-01
 0.1090815959     0.1774796151     0.2458860030     0.2467605067    
 0.3378590492     0.6355533298     0.5089990744     0.9705938487E-01
M2
    0
COREREP
   1.000
PROJOP
    1
   16    2    2    2
  138.0714802      12.57401843    
  1453205.000      183024.6000      37505.20000      9899.251000    
  3067.379000      1068.804000      406.1585000      164.8768000    
  70.46529000      31.35984000      14.24023000      5.516831000    
  2.457151000      1.099921000     0.2572950000     0.9153216000E-01
 -0.000039098692  0.000010888313
 -0.000053217803  0.000013905227
 -0.000449391553  0.000120017696
 -0.001979094403  0.000529468248
 -0.007581547988  0.002032441857
 -0.024909188660  0.006780609627
 -0.071382749494  0.019927760807
 -0.171133270605  0.051377724317
 -0.314714236524  0.108501661710
 -0.361800153980  0.173019895059
 -0.180679140213  0.111199010071
 -0.018684607041 -0.268501703672
  0.001372663362 -0.571240409084
 -0.000972008072 -0.319547049630
  0.000220587864 -0.005150100431
  0.000024766391  0.011353576766
   11    1    6
  8.820634101    
  1761.450000      352.2744000      103.8381000      36.92634000    
  14.69441000      6.229335000      2.705822000      1.176912000    
 0.4186666000     0.1604789000     0.5929782000E-01
 -0.000231205757
 -0.002625375658
 -0.015856328170
 -0.064167590388
 -0.180436509470
 -0.333001977395
 -0.391722270050
 -0.213771895643
 -0.022394547593
  0.011439819061
 -0.001061373698
*
Spectral Representation Operator
Core primitive basis
Exchange
End of Spectral Representation Operator
 

/Si.ECP.Seijo.16s11p.1s1p.0e-AIMP-Ca3Sc2Si3O12-Si(tet). 
Embedding AIMP of Si(4+) in Ca3Sc2Si3O12 with orthogonality orbitals
made Tue.Feb.21.19:00:43.CET.2012
   4.000    1
   16    1
  1453205.000      183024.6000      37505.20000      9899.251000    
  3067.379000      1068.804000      406.1585000      164.8768000    
  70.46529000      31.35984000      14.24023000      5.516831000    
  2.457151000      1.099921000     0.2572950000     0.9153216000E-01
   0.000010888313
   0.000013905227
   0.000120017696
   0.000529468248
   0.002032441857
   0.006780609627
   0.019927760807
   0.051377724317
   0.108501661710
   0.173019895059
   0.111199010071
  -0.268501703672
  -0.571240409084
  -0.319547049630
  -0.005150100431
   0.011353576766
   11    1
  1761.450000      352.2744000      103.8381000      36.92634000    
  14.69441000      6.229335000      2.705822000      1.176912000    
 0.4186666000     0.1604789000     0.5929782000E-01
 -0.000231205757
 -0.002625375658
 -0.015856328170
 -0.064167590388
 -0.180436509470
 -0.333001977395
 -0.391722270050
 -0.213771895643
 -0.022394547593
  0.011439819061
 -0.001061373698
*
* External AIMP: 
* Local Pot. Param. : (ECP convention)
*                      A(AIMP)=-Zeff*A(ECP)
*
M1
   12
  386824.1700      61256.17550      14385.20800      4007.307590    
  1276.586930      448.0888150      170.4439970      66.48803830    
  23.57856380      9.795362000      4.540920000      2.195340000    
 0.1759170270E-01 0.2080320080E-01 0.3805193936E-01 0.6487459819E-01
 0.1090815959     0.1774796151     0.2458860030     0.2467605067    
 0.3378590492     0.6355533298     0.5089990744     0.9705938487E-01
M2
    0
COREREP
   1.000
PROJOP
    1
   16    2    2    2
  138.0714802      12.57401843    
  1453205.000      183024.6000      37505.20000      9899.251000    
  3067.379000      1068.804000      406.1585000      164.8768000    
  70.46529000      31.35984000      14.24023000      5.516831000    
  2.457151000      1.099921000     0.2572950000     0.9153216000E-01
 -0.000039098692  0.000010888313
 -0.000053217803  0.000013905227
 -0.000449391553  0.000120017696
 -0.001979094403  0.000529468248
 -0.007581547988  0.002032441857
 -0.024909188660  0.006780609627
 -0.071382749494  0.019927760807
 -0.171133270605  0.051377724317
 -0.314714236524  0.108501661710
 -0.361800153980  0.173019895059
 -0.180679140213  0.111199010071
 -0.018684607041 -0.268501703672
  0.001372663362 -0.571240409084
 -0.000972008072 -0.319547049630
  0.000220587864 -0.005150100431
  0.000024766391  0.011353576766
   11    1    6
  8.820634101    
  1761.450000      352.2744000      103.8381000      36.92634000    
  14.69441000      6.229335000      2.705822000      1.176912000    
 0.4186666000     0.1604789000     0.5929782000E-01
 -0.000231205757
 -0.002625375658
 -0.015856328170
 -0.064167590388
 -0.180436509470
 -0.333001977395
 -0.391722270050
 -0.213771895643
 -0.022394547593
  0.011439819061
 -0.001061373698
*
Spectral Representation Operator
Core primitive basis
Exchange
End of Spectral Representation Operator
 

/Si.ECP.Seijo.16s11p.1s1p.0e-AIMP-Ca3Sc2Si3O12-Si(tet). 
Embedding AIMP of Si(4+) in Ca3Sc2Si3O12 
made Tue.Feb.21.19:00:43.CET.2012
   4.000    1
   16    1
  1453205.000      183024.6000      37505.20000      9899.251000    
  3067.379000      1068.804000      406.1585000      164.8768000    
  70.46529000      31.35984000      14.24023000      5.516831000    
  2.457151000      1.099921000     0.2572950000     0.9153216000E-01
   0.000010888313
   0.000013905227
   0.000120017696
   0.000529468248
   0.002032441857
   0.006780609627
   0.019927760807
   0.051377724317
   0.108501661710
   0.173019895059
   0.111199010071
  -0.268501703672
  -0.571240409084
  -0.319547049630
  -0.005150100431
   0.011353576766
   11    1
  1761.450000      352.2744000      103.8381000      36.92634000    
  14.69441000      6.229335000      2.705822000      1.176912000    
 0.4186666000     0.1604789000     0.5929782000E-01
 -0.000231205757
 -0.002625375658
 -0.015856328170
 -0.064167590388
 -0.180436509470
 -0.333001977395
 -0.391722270050
 -0.213771895643
 -0.022394547593
  0.011439819061
 -0.001061373698
*
* External AIMP: 
* Local Pot. Param. : (ECP convention)
*                      A(AIMP)=-Zeff*A(ECP)
*
M1
   12
  386824.1700      61256.17550      14385.20800      4007.307590    
  1276.586930      448.0888150      170.4439970      66.48803830    
  23.57856380      9.795362000      4.540920000      2.195340000    
 0.1759170270E-01 0.2080320080E-01 0.3805193936E-01 0.6487459819E-01
 0.1090815959     0.1774796151     0.2458860030     0.2467605067    
 0.3378590492     0.6355533298     0.5089990744     0.9705938487E-01
M2
    0
COREREP
   1.000
PROJOP
    1
   16    2    2    2
  138.0714802      12.57401843    
  1453205.000      183024.6000      37505.20000      9899.251000    
  3067.379000      1068.804000      406.1585000      164.8768000    
  70.46529000      31.35984000      14.24023000      5.516831000    
  2.457151000      1.099921000     0.2572950000     0.9153216000E-01
 -0.000039098692  0.000010888313
 -0.000053217803  0.000013905227
 -0.000449391553  0.000120017696
 -0.001979094403  0.000529468248
 -0.007581547988  0.002032441857
 -0.024909188660  0.006780609627
 -0.071382749494  0.019927760807
 -0.171133270605  0.051377724317
 -0.314714236524  0.108501661710
 -0.361800153980  0.173019895059
 -0.180679140213  0.111199010071
 -0.018684607041 -0.268501703672
  0.001372663362 -0.571240409084
 -0.000972008072 -0.319547049630
  0.000220587864 -0.005150100431
  0.000024766391  0.011353576766
   11    1    6
  8.820634101    
  1761.450000      352.2744000      103.8381000      36.92634000    
  14.69441000      6.229335000      2.705822000      1.176912000    
 0.4186666000     0.1604789000     0.5929782000E-01
 -0.000231205757
 -0.002625375658
 -0.015856328170
 -0.064167590388
 -0.180436509470
 -0.333001977395
 -0.391722270050
 -0.213771895643
 -0.022394547593
  0.011439819061
 -0.001061373698
*
Spectral Representation Operator
Core primitive basis
Exchange
End of Spectral Representation Operator
 

/O.ECP.Seijo.0s.0s.0e-AIMP-Ca3Sc2Si3O12-O.    
Embedding AIMP of O(2-)  in Ca3Sc2Si3O12 
made Tue.Feb.21.19:10:47.CET.2012
  -2.000    0
    0    0
*
* External AIMP: 
* Local Pot. Param. : (ECP convention)
*                      A(AIMP)=-Zeff*A(ECP)
*
M1
   12
  282885.8300      34740.01200      6502.573000      1486.426000    
  406.8273300      124.8370000      41.98461900      13.81633000    
  4.272136000      1.610321600     0.6078900000     0.2644720000    
 -.2176068139E-01 -.3193591586E-01 -.6532317636E-01 -.1221920742    
 -.2185120295     -.3849856166     -.5102967172     -.4623511455    
 -.7568749648     -1.326993189     -1.037404143     -.6137034667E-01
M2
    0
COREREP
   1.000
PROJOP
    1
    8    2    2    2
  40.44014878      2.148124911    
  2048.050000      309.0990000      70.41410000      19.70120000    
  6.031450000      10.22970000     0.9340900000     0.2862500000    
  0.006201616900  0.001319459497
  0.045636993870  0.009641222820
  0.200037124528  0.046660763823
  0.473806483924  0.116681627741
  0.380895276394  0.104901217687
  0.028828534381  0.063537785967
  0.024697185479 -0.471254278768
 -0.005594087132 -0.634895384001
    6    1    6
 0.6467565112    
  34.97120000      7.845090000      2.303320000     0.7219800000    
 0.2155300000     0.5900000000E-01
  0.013135630071
  0.085928653969
  0.247148699374
  0.449813599164
  0.491199775355
 -0.079484485613
*
Spectral Representation Operator
Core primitive basis
Exchange
End of Spectral Representation Operator
 
 
********************************************************************************
*         E.7.X. Lu2CaMg2Si3O12 
********************************************************************************
*           E.7.X.a. Lu2CaMg2Si3O12
*             Structure:
*                    A.A.Setlur et al., Chem. Mater. 18(2006)3314
*                    (Ia-3d; a=11.9750A, x=-0.0351, =0.0538, z=0.1578
*             Embedding potentials:
*                    L.Seijo, Z.Barandiaran, to be published
*                    Out of SCEI DKH-HF calculations
*             /Lu.ECP.Seijo.0s.0s.0e-AIMP-Lu2CaMg2Si3O12-Lu.
*             /Ca.ECP.Seijo.0s.0s.0e-AIMP-Lu2CaMg2Si3O12-Ca.
*             /Mg.ECP.Seijo.0s.0s.0e-AIMP-Lu2CaMg2Si3O12-Mg(oct).
*             /Si.ECP.Seijo.0s.0s.0e-AIMP-Lu2CaMg2Si3O12-Si(tet).
*             /Si.ECP.Seijo.16s11p.1s1p.0e-AIMP-Lu2CaMg2Si3O12-Si(tet).
*             /O.ECP.Seijo.0s.0s.0e-AIMP-Lu2CaMg2Si3O12-O.
********************************************************************************
/Lu.ECP.Seijo.0s.0s.0e-AIMP-Lu2CaMg2Si3O12-Lu. 
Embedding AIMP of Lu(3+) in Lu2CaMg2Si3O12 
made Thu.Feb.23.05:40:18.CET.2012
   3.000    0
    0    0
*
* External AIMP: 
* Local Pot. Param. : (ECP convention)
*                      A(AIMP)=-Zeff*A(ECP)
*
M1
   13
  441130.0000      78986.00000      21089.00000      6510.300000    
  2144.800000      727.2900000      305.4500000      95.42200000    
  51.83800000      11.05620000      5.304800000      1.810700000    
 0.8236900000    
 0.2406037430     0.2557946439     0.4332835888     0.6520330814    
 0.8506819848      1.482588859      1.855862759      2.131588641    
  3.592069712      4.950094205      2.980578045      2.338464283    
 0.9030231209    
M2
    0
COREREP
   1.000
PROJOP
    3
   27    5    2    2    2    2    2
  4669.214682      804.8302321      186.3569500      38.92484656    
  4.977518612    
 0.6701311900E+11  7216717800.      1171529200.      235233120.0    
  55877724.00      14949778.00      4363017.000      1375340.500    
  456540.5200      160435.3700      59637.10400      23233.14400    
  9474.040900      4032.731300      1779.753900      807.8776800    
  374.9260700      172.1622700      81.75905400      34.04620200    
  17.67359800      7.084092600      3.479507300     0.9931652500    
 0.4458321400     0.7721303500E-01 0.3053352200E-01
 -0.000000244159 -0.000000081509 -0.000000051623  0.000000015328 -0.000000006643
  0.000001120858  0.000000374559  0.000000236647 -0.000000070584  0.000000030560
 -0.000004011432 -0.000001348944 -0.000000839505  0.000000257494 -0.000000110723
  0.000016057859  0.000005559798  0.000003220044 -0.000001123084  0.000000468574
 -0.000595541280 -0.000221485214 -0.000106087664  0.000050450057 -0.000019778835
 -0.000742824110 -0.000280859363 -0.000128808244  0.000065474618 -0.000025371335
 -0.001956849062 -0.000727632361 -0.000351835787  0.000165074089 -0.000064910893
 -0.003949491924 -0.001497905730 -0.000690998523  0.000348563302 -0.000135141193
 -0.008181500879 -0.003073807874 -0.001481830004  0.000700439749 -0.000275554579
 -0.016327091800 -0.006257096969 -0.002933280116  0.001449215584 -0.000561566019
 -0.032284660281 -0.012495628141 -0.005959476475  0.002885521601 -0.001126712883
 -0.063239750961 -0.025221363519 -0.011988781226  0.005864796872 -0.002284886283
 -0.120490529981 -0.050090621132 -0.024128863772  0.011760088953 -0.004583812827
 -0.213403003960 -0.096618158967 -0.046861710506  0.023033796455 -0.008993411799
 -0.315171280866 -0.163496009471 -0.082167505776  0.040358992985 -0.015750391321
 -0.302931793739 -0.195815529020 -0.100636943132  0.050566208411 -0.019844589335
 -0.121186106741  0.010629782631  0.012944295598 -0.008839851112  0.003690999938
 -0.007602093799  0.503632354711  0.431203291161 -0.238273417580  0.095474972840
 -0.000655846211  0.534061668783  0.582641881182 -0.363866720764  0.150260178278
  0.000523977180  0.095857165585 -0.464940694017  0.457441114708 -0.208804227445
 -0.000298542739 -0.014771628432 -0.818860425649  0.986636858797 -0.475234024098
  0.000144190179  0.005047931946 -0.115530875697 -0.614307825665  0.432037865745
 -0.000076425681 -0.002356372609  0.014455582308 -0.857244718214  0.774863926642
  0.000025280027  0.000735595602 -0.003857486733 -0.057488789346 -0.702138912326
 -0.000011435565 -0.000345101359  0.001798137927  0.013030635544 -0.654737938184
  0.000002918352  0.000086932238 -0.000425524830 -0.002446781531 -0.001677716010
 -0.000001437668 -0.000040155604  0.000195421661  0.001137642814  0.006221461124
   23    4    6    6    6    6
  710.2264583      157.2420349      29.14160719      2.438251283    
  55602773.00      7765745.900      1589584.300      401810.9500    
  118603.3400      39300.00000      14430.35400      5793.124600    
  2497.821500      1143.717300      551.3977100      277.7501400    
  145.0303300      77.44745600      41.75015500      23.22694800    
  12.93638700      7.026064900      3.744504700      1.899190800    
 0.9146347400     0.4226736900     0.1733363600    
 -0.000001787486 -0.000000941646  0.000000369672 -0.000000210150
 -0.000029778280 -0.000014803249  0.000007475619 -0.000002208202
 -0.000077473699 -0.000039657036  0.000017830828 -0.000007396355
 -0.000219006617 -0.000109128715  0.000055186460 -0.000016207648
 -0.000590314267 -0.000299796764  0.000141846518 -0.000052241141
 -0.001617918222 -0.000820946851  0.000396168005 -0.000137351228
 -0.004448877155 -0.002272304678  0.001092131489 -0.000385269720
 -0.012330231737 -0.006350263769  0.003064248923 -0.001074529197
 -0.033632795525 -0.017577836747  0.008499387264 -0.002995034682
 -0.085361657886 -0.045767211583  0.022289930714 -0.007832556343
 -0.184634876507 -0.103020111933  0.050574435822 -0.017889581126
 -0.306178391533 -0.179922340179  0.089736864417 -0.031622486183
 -0.333940588211 -0.192210170144  0.094507563214 -0.033672054157
 -0.191850066297  0.015580229083 -0.030487879070  0.013330212072
 -0.041369772500  0.389529614604 -0.292135859397  0.110413710785
 -0.001846259048  0.478691783456 -0.385623015456  0.153259488489
 -0.000145658887  0.202678825262  0.045198479659 -0.048910827343
  0.000133670639  0.026107516819  0.546128108166 -0.272994397581
  0.000015743341  0.001459784377  0.482015652466 -0.306023579442
  0.000006046762  0.000165320500  0.118269776408  0.132485407728
 -0.000001385223 -0.000003884438  0.003808978862  0.520819599460
  0.000000056778  0.000004542709  0.001381982045  0.515003612411
  0.000000067483 -0.000004598591 -0.000441904127  0.024900635706
   15    2   10   10
  121.0633589      15.90513011    
  16241.49300      4278.988200      1524.597100      640.8577100    
  295.5655200      143.5265800      71.89617500      36.65707500    
  18.88423700      9.510456800      4.620822600      2.112008600    
 0.7516843600     0.2514027000     0.7547191500E-01
  0.000085227909  0.000041409851
  0.000604051322  0.000295456839
  0.003323691269  0.001623951094
  0.014681190082  0.007257030921
  0.052573806428  0.026160221344
  0.148496094682  0.075637977863
  0.301129884361  0.152370923991
  0.388472781929  0.180766956063
  0.249911825017 -0.020930154044
  0.059008204721 -0.385959251374
  0.003152945015 -0.487169720921
  0.000572999879 -0.223602676495
 -0.000003429486 -0.021284940573
  0.000021597308  0.001549969992
 -0.000006333266 -0.000322920186
   10    1   14
  1.247433889    
  1573.111300      295.9291500      108.3458800      47.08844000    
  21.82595400      10.48002400      4.988653200      2.304761500    
 0.9995225700     0.3810215700    
 -0.000091148588
 -0.002175038166
 -0.015333911670
 -0.061822277883
 -0.166136937609
 -0.288169400187
 -0.342977516076
 -0.296630046907
 -0.187499722509
 -0.063146590208
*
Spectral Representation Operator
Core primitive basis
Exchange
End of Spectral Representation Operator
 

/Ca.ECP.Seijo.0s.0s.0e-AIMP-Lu2CaMg2Si3O12-Ca. 
Embedding AIMP of Ca(2+) in Lu2CaMg2Si3O12 
made Thu.Feb.23.05:50:26.CET.2012
   2.000    0
    0    0
*
* External AIMP: 
* Local Pot. Param. : (ECP convention)
*                      A(AIMP)=-Zeff*A(ECP)
*
M1
   14
  385360.0000      60875.00000      14577.00000      4126.200000    
  1323.700000      469.9300000      176.8100000      62.80500000    
  25.66500000      12.14430000      3.192200000      1.623200000    
 0.8310600000     0.4155900000    
 0.6036614402E-01 0.7111825512E-01 0.1275885639     0.2208891812    
 0.3695656566     0.5565149561     0.6367284451     0.8056061762    
  1.558980577      1.289929220     0.7370928229      1.684558975    
 0.8572972358     0.2376379094E-01
M2
    0
COREREP
   1.000
PROJOP
    1
   20    3    2    2    2
  299.3931996      33.09230216      3.668938502    
  15429060.00      1717766.000      325290.8000      83104.29000    
  25219.11000      8662.800000      3220.967000      1283.738000    
  543.4592000      240.8390000      109.9677000      51.34453000    
  24.28419000      10.50093000      4.922923000      2.340607000    
 0.9214525000     0.3826710000     0.6533290000E-01 0.2618455000E-01
 -0.000027810228 -0.000008190314 -0.000002790681
 -0.000115765890 -0.000033740721 -0.000011837539
 -0.000336266225 -0.000098687196 -0.000033811108
 -0.000900926729 -0.000264431028 -0.000091367457
 -0.002361578750 -0.000694275812 -0.000238737155
 -0.006274387766 -0.001856486135 -0.000642510173
 -0.017042367689 -0.005074944729 -0.001743937242
 -0.044365313550 -0.013531617354 -0.004709350855
 -0.105346257694 -0.033386185773 -0.011516178822
 -0.214806076244 -0.075062782228 -0.026598418082
 -0.335646271003 -0.140370392096 -0.049664803560
 -0.309852061335 -0.186534663713 -0.071282253651
 -0.112210857533 -0.043753765309 -0.013819298224
 -0.007663824043  0.400543929055  0.181072652916
 -0.000346987856  0.569326524216  0.443717187365
  0.000032639831  0.176392801694  0.095748652780
  0.000045648249  0.007695973236 -0.686179145098
  0.000012224377  0.000762034802 -0.550886722816
  0.000001748983 -0.000213099335  0.006561117515
 -0.000000926338  0.000086381428  0.002984246748
   15    2    6    6
  26.44581776      1.830795467    
  51912.48000      8887.833000      2423.370000      833.8344000    
  329.6573000      142.4756000      65.46554000      31.43317000    
  15.49410000      7.765115000      3.924985000      1.924370000    
 0.9138395000     0.4202105000     0.1757597000    
 -0.000014571818 -0.000004790484
 -0.000084904236 -0.000027608855
 -0.000435558464 -0.000144395864
 -0.001990533270 -0.000646807856
 -0.007868198750 -0.002629207087
 -0.026523237850 -0.008736623481
 -0.075267809791 -0.025927244090
 -0.171409807217 -0.059185353936
 -0.294470145975 -0.109085419006
 -0.349431701704 -0.130668170764
 -0.222260850784 -0.066022912301
 -0.049866477396  0.234791861824
 -0.001369657431  0.435360136832
 -0.000717074007  0.440399185713
  0.000247618835  0.038902349857
*
Spectral Representation Operator
Core primitive basis
Exchange
End of Spectral Representation Operator
 

/Mg.ECP.Seijo.0s.0s.0e-AIMP-Lu2CaMg2Si3O12-Mg(oct).
Embedding AIMP of Mg(2+) in Lu2CaMg2Si3O12 
made Thu.Feb.23.05:59:54.CET.2012
   2.000    0
    0    0
*
* External AIMP: 
* Local Pot. Param. : (ECP convention)
*                      A(AIMP)=-Zeff*A(ECP)
*
M1
   13
  418030.0000      70189.00000      17181.00000      4864.400000    
  1561.700000      551.3800000      210.9900000      85.73900000    
  34.07700000      12.89920000      5.719000000      2.683900000    
  1.266210000    
 0.2771106231E-01 0.3115755420E-01 0.5640904935E-01 0.9616521795E-01
 0.1589936297     0.2595896016     0.3935215472     0.4735856307    
 0.4415550496     0.7399200046      1.211510227     0.9138273720    
 0.1960540535    
M2
    0
COREREP
   1.000
PROJOP
    1
   16    2    2    2
  97.71508149      7.143391380    
  1694068.000      192336.9000      39966.58000      10658.15000    
  3203.178000      1064.467000      385.2409000      149.6694000    
  61.39625000      26.30771000      11.48114000      4.164014000    
  1.753899000     0.7137424000     0.1131305000     0.4072101000E-01
 -0.000005879461 -0.000001747277
 -0.000046872770 -0.000011680216
 -0.000268489338 -0.000067861006
 -0.001242164673 -0.000314472796
 -0.005072282441 -0.001284676918
 -0.018035643854 -0.004624003562
 -0.055781685919 -0.014573596633
 -0.145276773091 -0.040297768737
 -0.294450977924 -0.091703375411
 -0.384516105786 -0.160703713241
 -0.224543842828 -0.134155170202
 -0.025483236550  0.218817357140
  0.002195369406  0.575779906994
 -0.001198797603  0.361172833505
  0.000227156144  0.004283952580
 -0.000072725257 -0.006607571528
   11    1    6
  4.189936084    
  1213.444000      274.6633000      87.11188000      32.75345000    
  13.63020000      6.039718000      2.745523000      1.238350000    
 0.9013199000     0.5851599000     0.2300177000    
 -0.000211716443
 -0.001987694805
 -0.010715240761
 -0.041289246334
 -0.116436366863
 -0.240433052459
 -0.332181228940
 -0.395143622690
  0.121423900524
 -0.220536508204
  0.004566724348
*
Spectral Representation Operator
Core primitive basis
Exchange
End of Spectral Representation Operator
 

/Si.ECP.Seijo.0s.0s.0e-AIMP-Lu2CaMg2Si3O12-Si(tet).
Embedding AIMP of Si(4+) in Lu2CaMg2Si3O12 
made Thu.Feb.23.06:09:53.CET.2012
   4.000    0
    0    0
*
* External AIMP: 
* Local Pot. Param. : (ECP convention)
*                      A(AIMP)=-Zeff*A(ECP)
*
M1
   12
  390564.1700      62340.17550      14730.20800      4118.807590    
  1315.286930      462.0788150      175.7239970      68.67503830    
  24.31956380      10.00546200      4.599620000      2.187540000    
 0.1747406507E-01 0.2052037388E-01 0.3746174685E-01 0.6377708655E-01
 0.1071259720     0.1746255279     0.2440897495     0.2475511845    
 0.3311584849     0.6340747468     0.5226391836     0.9950187838E-01
M2
    0
COREREP
   1.000
PROJOP
    1
   16    2    2    2
  138.1969834      12.70369963    
  1453205.000      183024.6000      37505.20000      9899.251000    
  3067.379000      1068.804000      406.1585000      164.8768000    
  70.46529000      31.35984000      14.24023000      5.516831000    
  2.457151000      1.099921000     0.2572950000     0.9153216000E-01
 -0.000039098715  0.000010879078
 -0.000053217668  0.000013903151
 -0.000449393693  0.000119903947
 -0.001979086438  0.000529379988
 -0.007581604036  0.002030072363
 -0.024909019219  0.006781159844
 -0.071383568660  0.019898366296
 -0.171131320259  0.051402744713
 -0.314720929460  0.108267659072
 -0.361785820139  0.173329820568
 -0.180704688567  0.110265205168
 -0.018630630067 -0.266278957451
  0.001287801612 -0.574895392537
 -0.000885725275 -0.313725866730
  0.000139102655 -0.011616674539
  0.000035568535  0.011747699925
   11    1    6
  8.942122035    
  1761.450000      352.2744000      103.8381000      36.92634000    
  14.69441000      6.229335000      2.705822000      1.176912000    
 0.4186666000     0.1604789000     0.5929782000E-01
 -0.000231242356
 -0.002624934243
 -0.015858912475
 -0.064156064679
 -0.180482618624
 -0.332882044826
 -0.391949095738
 -0.213074738142
 -0.022464399700
  0.008911538263
 -0.000203472514
*
Spectral Representation Operator
Core primitive basis
Exchange
End of Spectral Representation Operator
 
/Si.ECP.Seijo.16s11p.1s1p.0e-AIMP-Lu2CaMg2Si3O12-Si(tet).
Embedding AIMP of Si(4+) in Lu2CaMg2Si3O12 with orthogonality orbitals
made Thu.Feb.23.06:09:53.CET.2012
   4.000    1
   16    1
  1453205.000      183024.6000      37505.20000      9899.251000    
  3067.379000      1068.804000      406.1585000      164.8768000    
  70.46529000      31.35984000      14.24023000      5.516831000    
  2.457151000      1.099921000     0.2572950000     0.9153216000E-01
   0.000010879078
   0.000013903151
   0.000119903947
   0.000529379988
   0.002030072363
   0.006781159844
   0.019898366296
   0.051402744713
   0.108267659072
   0.173329820568
   0.110265205168
  -0.266278957451
  -0.574895392537
  -0.313725866730
  -0.011616674539
   0.011747699925
   11    1 
  1761.450000      352.2744000      103.8381000      36.92634000    
  14.69441000      6.229335000      2.705822000      1.176912000    
 0.4186666000     0.1604789000     0.5929782000E-01
 -0.000231242356
 -0.002624934243
 -0.015858912475
 -0.064156064679
 -0.180482618624
 -0.332882044826
 -0.391949095738
 -0.213074738142
 -0.022464399700
  0.008911538263
 -0.000203472514
*
* External AIMP: 
* Local Pot. Param. : (ECP convention)
*                      A(AIMP)=-Zeff*A(ECP)
*
M1
   12
  390564.1700      62340.17550      14730.20800      4118.807590    
  1315.286930      462.0788150      175.7239970      68.67503830    
  24.31956380      10.00546200      4.599620000      2.187540000    
 0.1747406507E-01 0.2052037388E-01 0.3746174685E-01 0.6377708655E-01
 0.1071259720     0.1746255279     0.2440897495     0.2475511845    
 0.3311584849     0.6340747468     0.5226391836     0.9950187838E-01
M2
    0
COREREP
   1.000
PROJOP
    1
   16    2    2    2
  138.1969834      12.70369963    
  1453205.000      183024.6000      37505.20000      9899.251000    
  3067.379000      1068.804000      406.1585000      164.8768000    
  70.46529000      31.35984000      14.24023000      5.516831000    
  2.457151000      1.099921000     0.2572950000     0.9153216000E-01
 -0.000039098715  0.000010879078
 -0.000053217668  0.000013903151
 -0.000449393693  0.000119903947
 -0.001979086438  0.000529379988
 -0.007581604036  0.002030072363
 -0.024909019219  0.006781159844
 -0.071383568660  0.019898366296
 -0.171131320259  0.051402744713
 -0.314720929460  0.108267659072
 -0.361785820139  0.173329820568
 -0.180704688567  0.110265205168
 -0.018630630067 -0.266278957451
  0.001287801612 -0.574895392537
 -0.000885725275 -0.313725866730
  0.000139102655 -0.011616674539
  0.000035568535  0.011747699925
   11    1    6
  8.942122035    
  1761.450000      352.2744000      103.8381000      36.92634000    
  14.69441000      6.229335000      2.705822000      1.176912000    
 0.4186666000     0.1604789000     0.5929782000E-01
 -0.000231242356
 -0.002624934243
 -0.015858912475
 -0.064156064679
 -0.180482618624
 -0.332882044826
 -0.391949095738
 -0.213074738142
 -0.022464399700
  0.008911538263
 -0.000203472514
*
Spectral Representation Operator
Core primitive basis
Exchange
End of Spectral Representation Operator
 

/O.ECP.Seijo.0s.0s.0e-AIMP-Lu2CaMg2Si3O12-O.   
Embedding AIMP of O(2-)  in Lu2CaMg2Si3O12 
made Thu.Feb.23.06:19:23.CET.2012
  -2.000    0
    0    0
*
* External AIMP: 
* Local Pot. Param. : (ECP convention)
*                      A(AIMP)=-Zeff*A(ECP)
*
M1
   12
  282885.8300      34740.01200      6502.573000      1486.426000    
  406.8273300      124.8370000      41.98461900      13.81633000    
  4.272136000      1.610321600     0.6078900000     0.2644720000    
 -.2174230124E-01 -.3188761167E-01 -.6529857544E-01 -.1219742317    
 -.2184811383     -.3843088314     -.5103141984     -.4603767616    
 -.7578810079     -1.311165150     -1.050535288     -.6603490517E-01
M2
    0
COREREP
   1.000
PROJOP
    1
    8    2    2    2
  40.30738060      2.011436063    
  2048.050000      309.0990000      70.41410000      19.70120000    
  6.031450000      10.22970000     0.9340900000     0.2862500000    
  0.006201811976  0.001316692821
  0.045637958342  0.009609917403
  0.200045758796  0.046601297026
  0.473802571640  0.115809102354
  0.380812473230  0.102541784341
  0.028913728696  0.065279029306
  0.024673642722 -0.465893791739
 -0.005608681773 -0.639400936339
    6    1    6
 0.4981329583    
  34.97120000      7.845090000      2.303320000     0.7219800000    
 0.2155300000     0.5900000000E-01
  0.013152275326
  0.085614659783
  0.248343136667
  0.442040589255
  0.500944742537
 -0.083250416464
*
Spectral Representation Operator
Core primitive basis
Exchange
End of Spectral Representation Operator
 
 
